# Supplementary material for: Peripheral blood microbial signatures in current and former smokers
Source: PubMed Central journal article supplement (PMC8494912; doi:10.1038/s41598-021-99238-4), 2021-10-06

Plot of model residuals

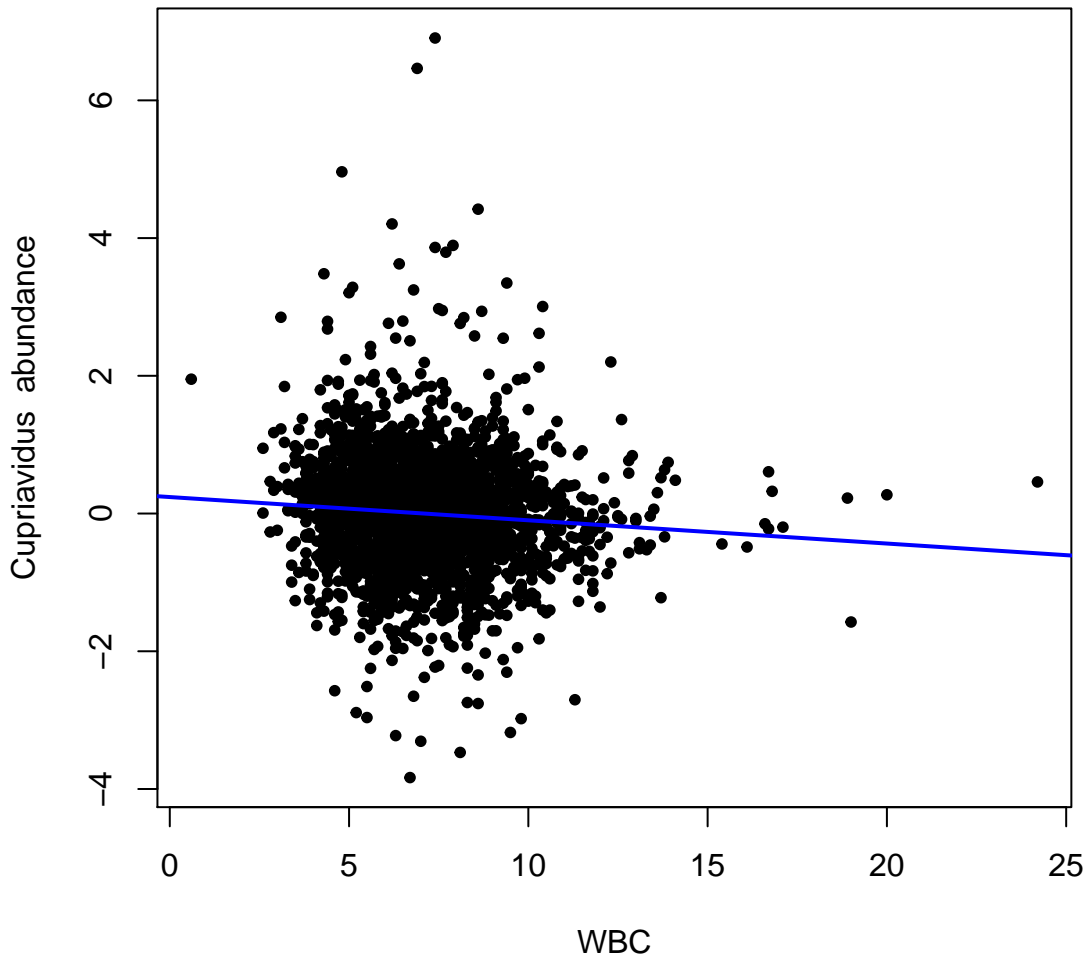

Plot of model residuals

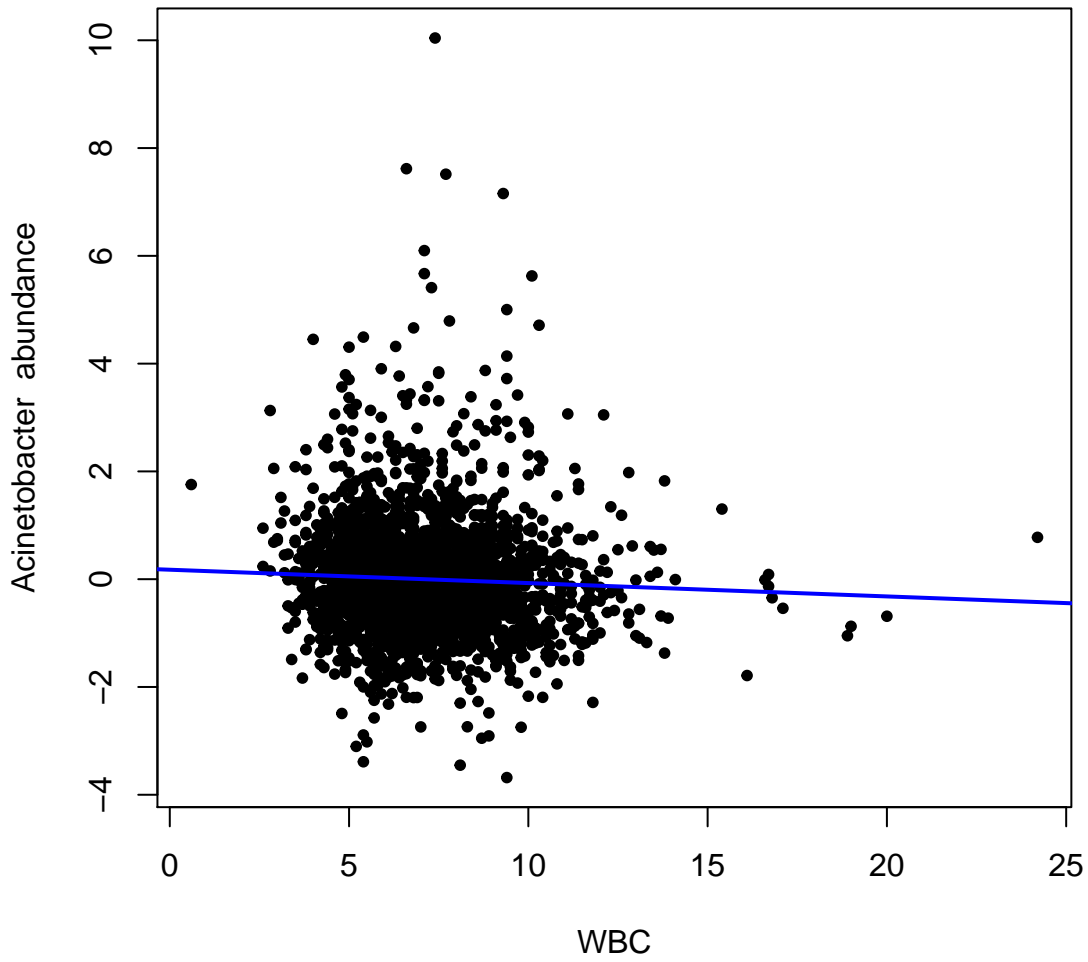

### Plot of model residuals

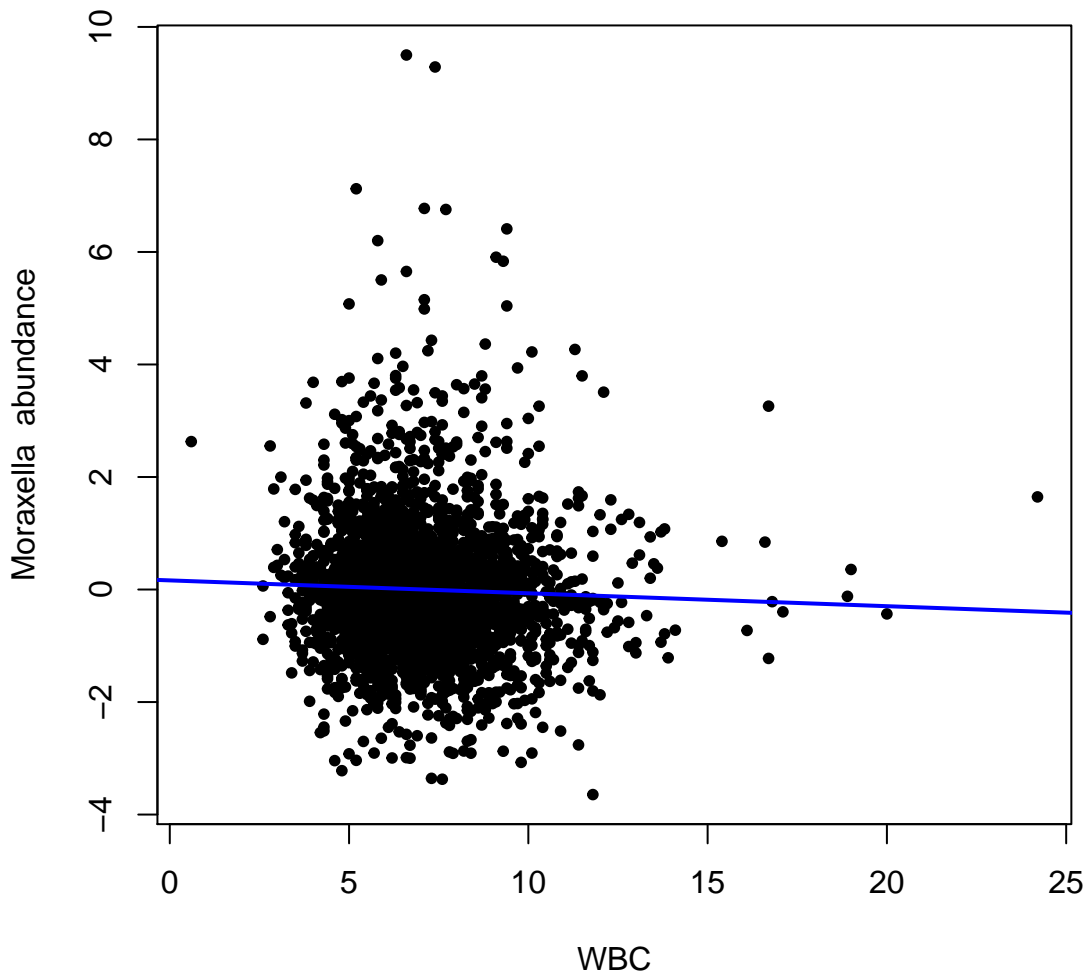

Plot of model residuals

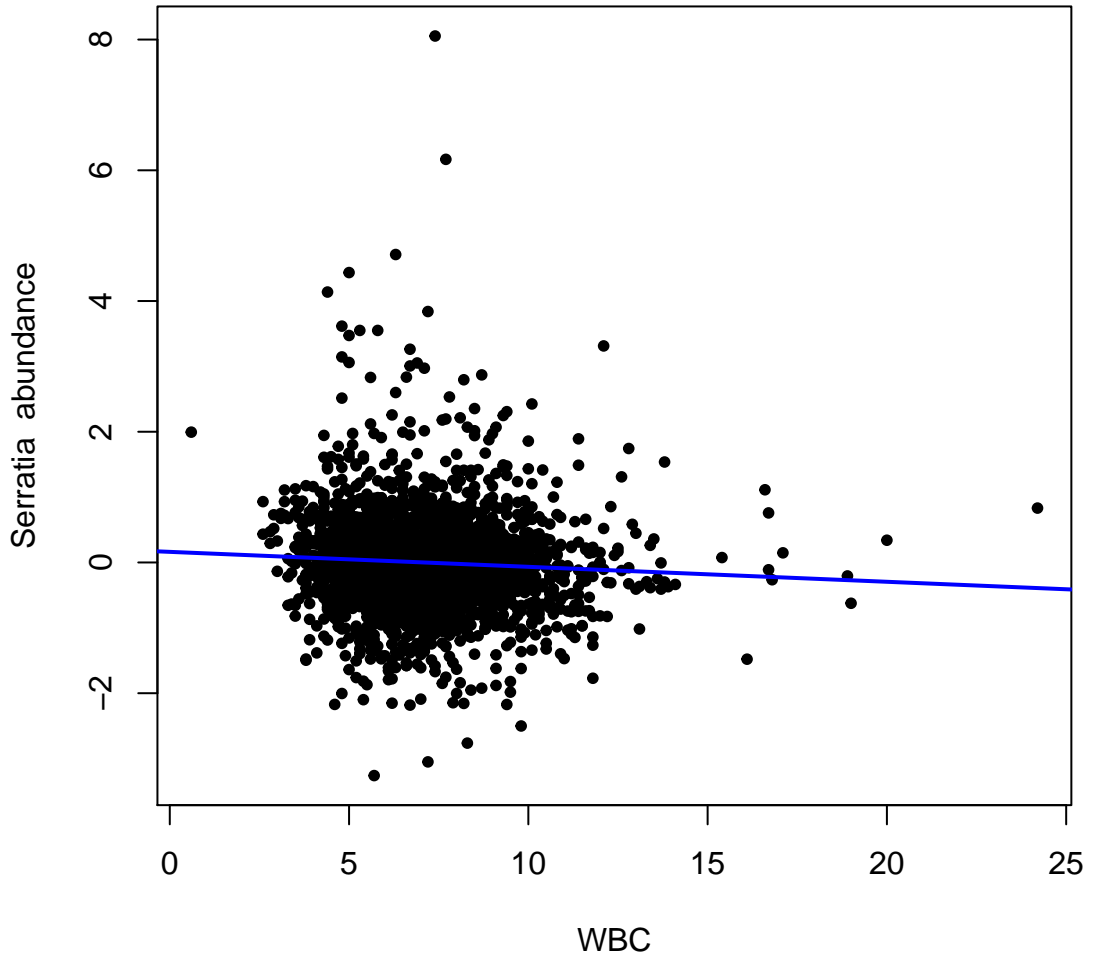

### Plot of model residuals

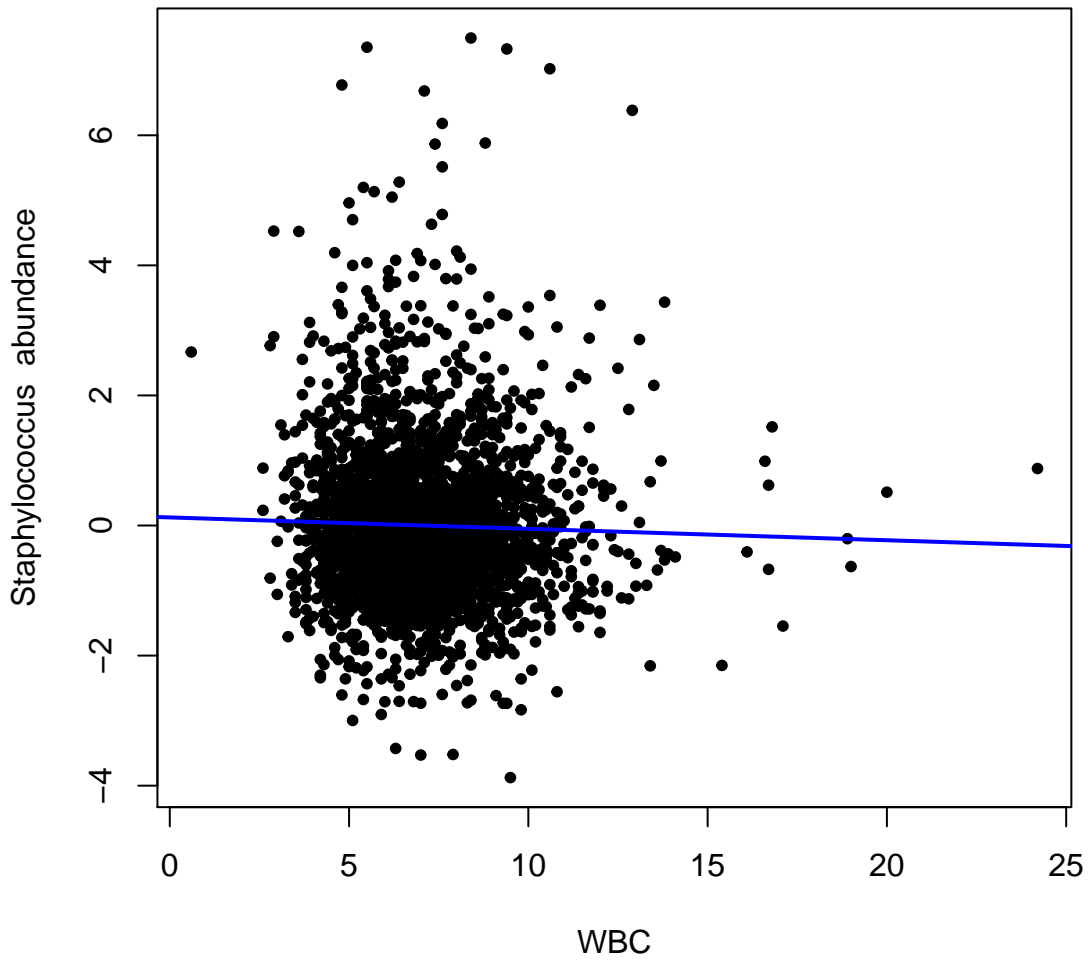

Plot of model residuals

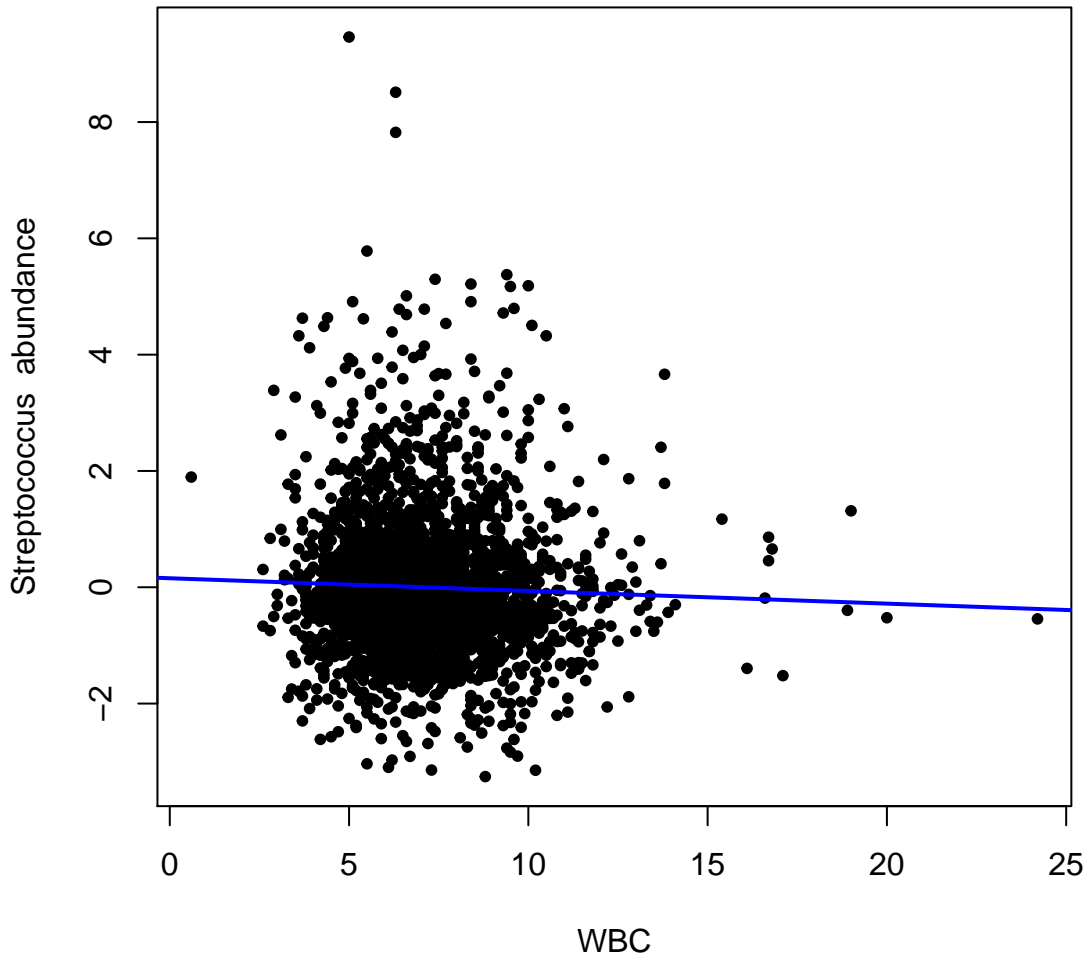

Plot of model residuals

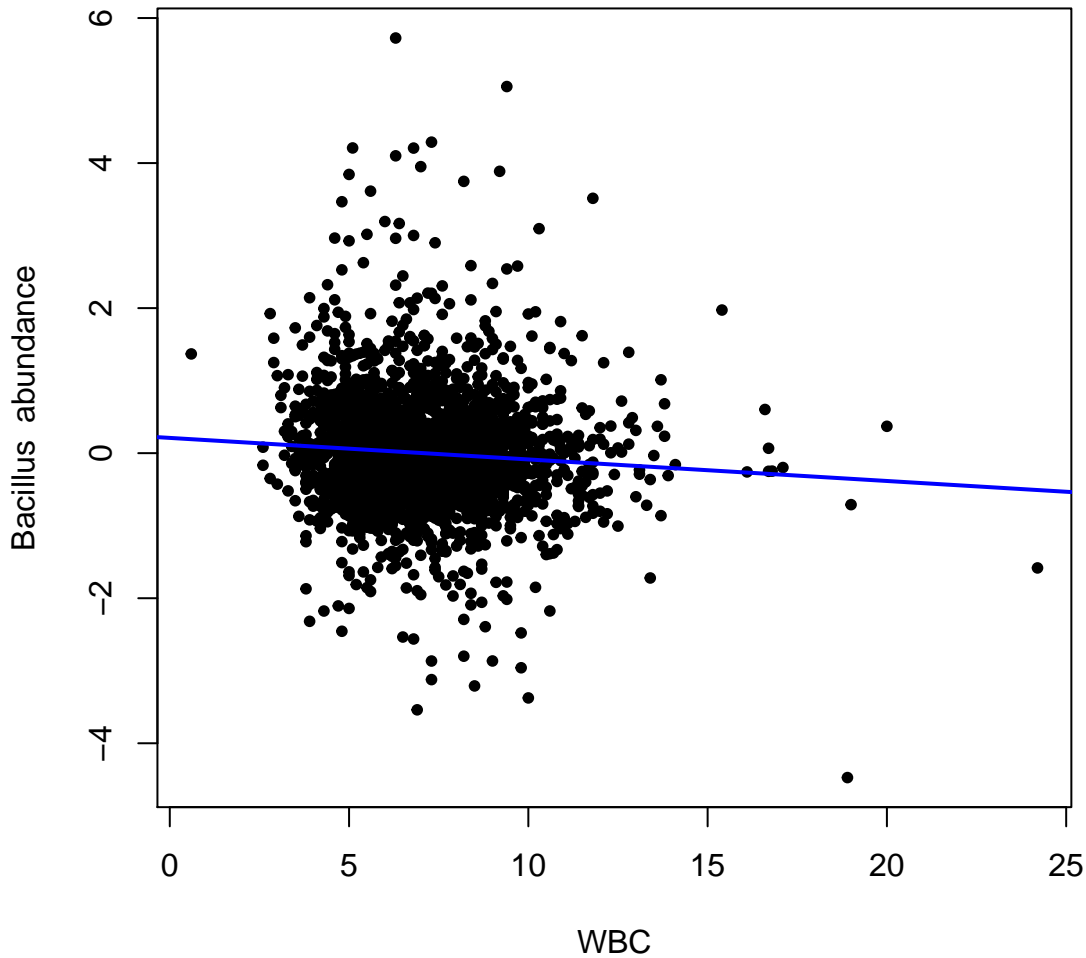

### Plot of model residuals

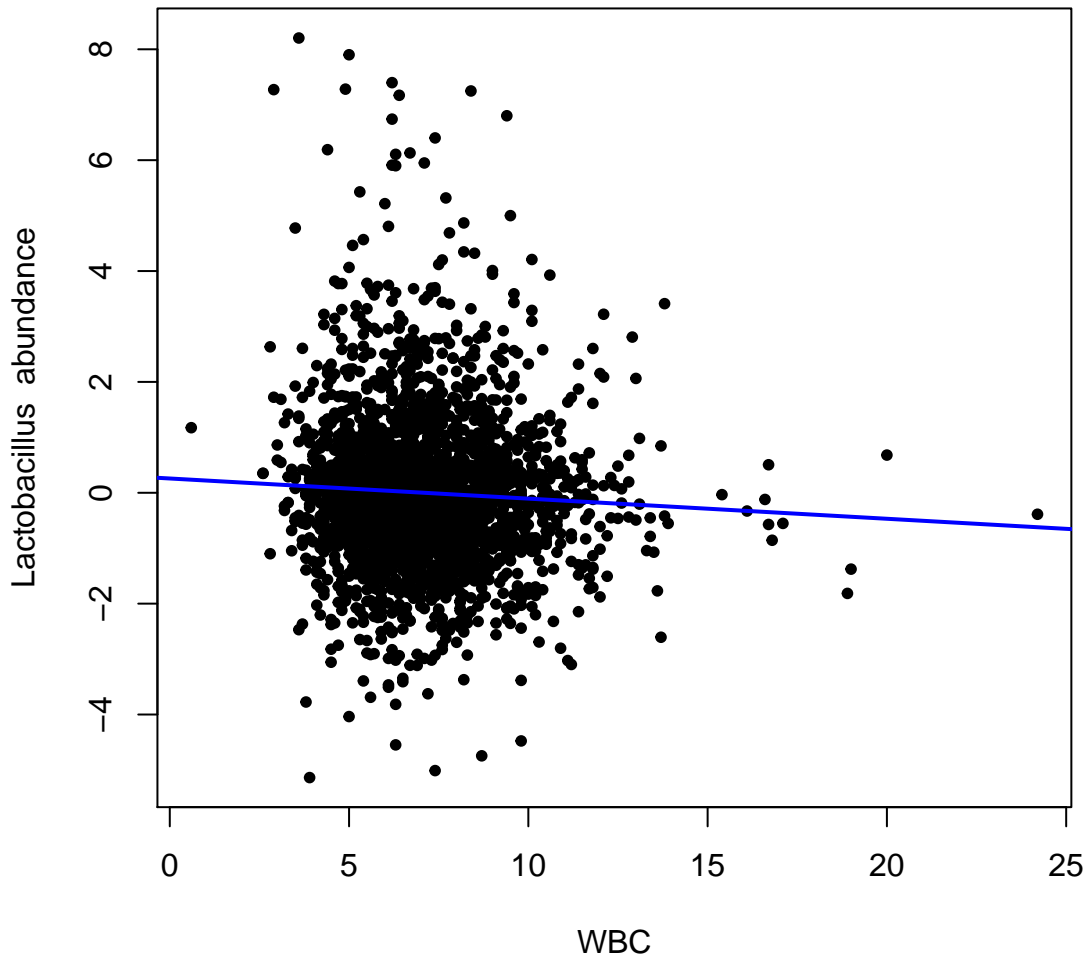



Plot of model residuals

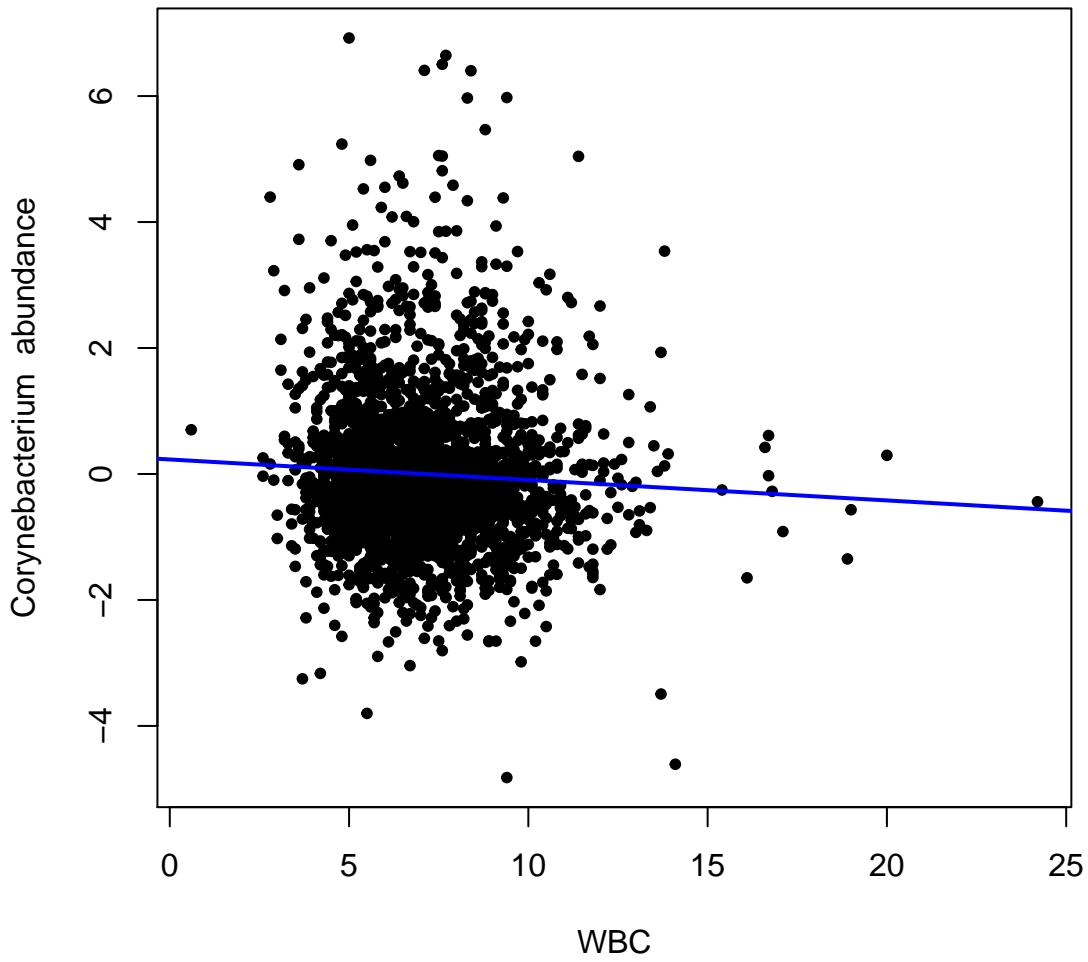

Plot of model residuals

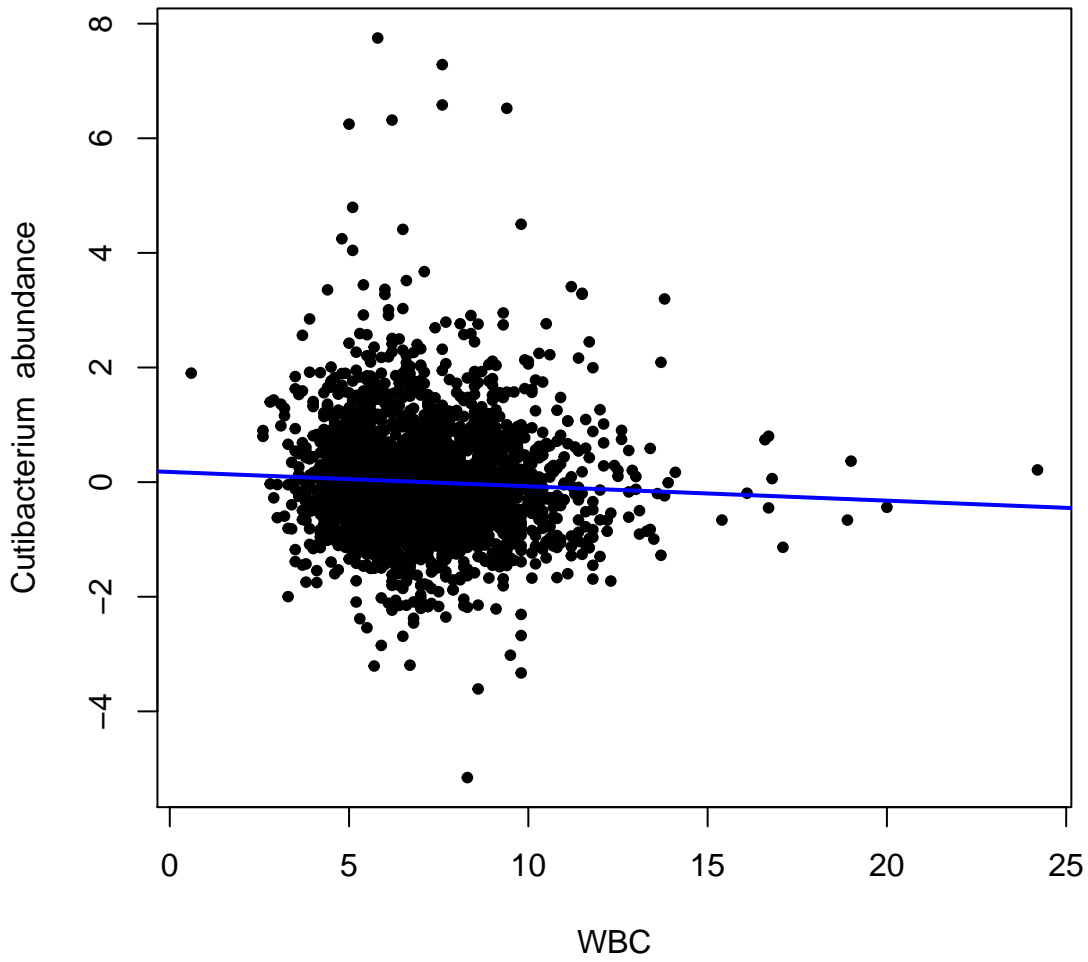

Plot of model residuals

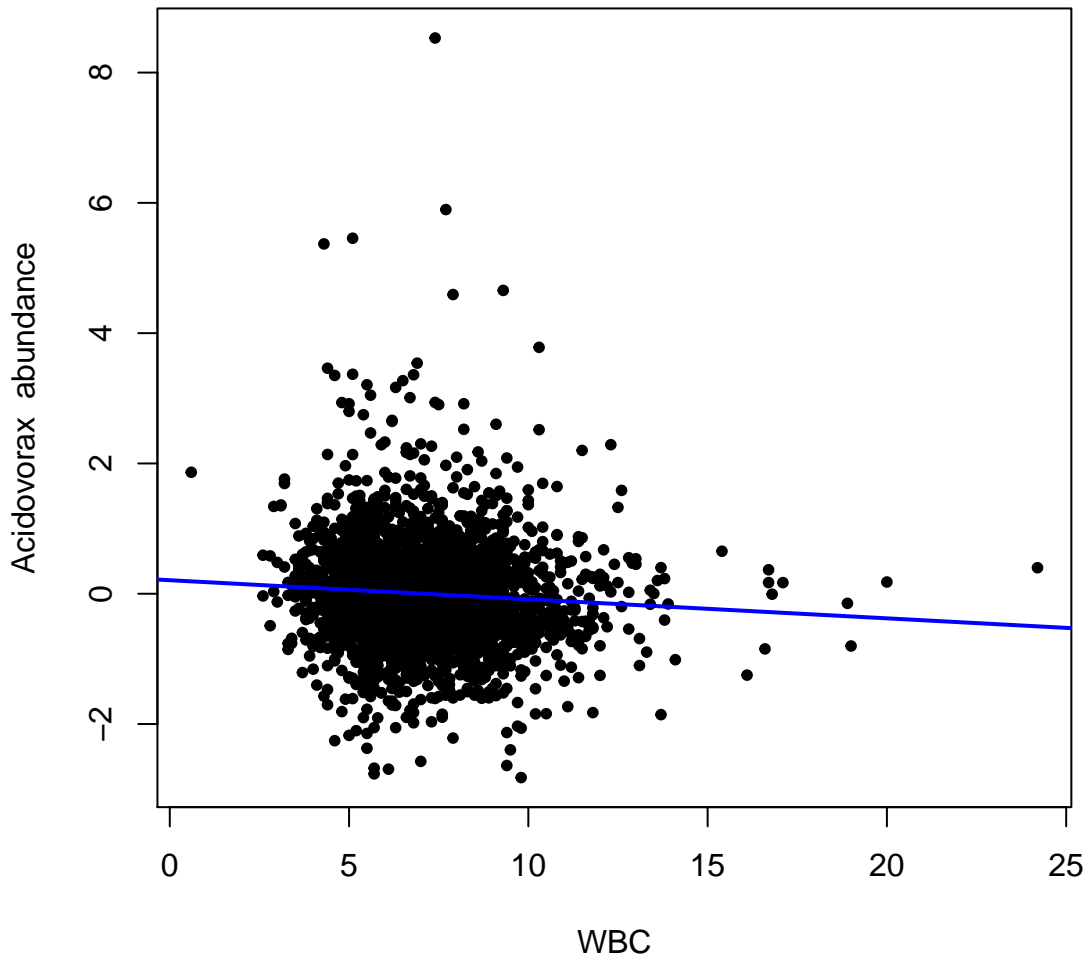

Plot of model residuals

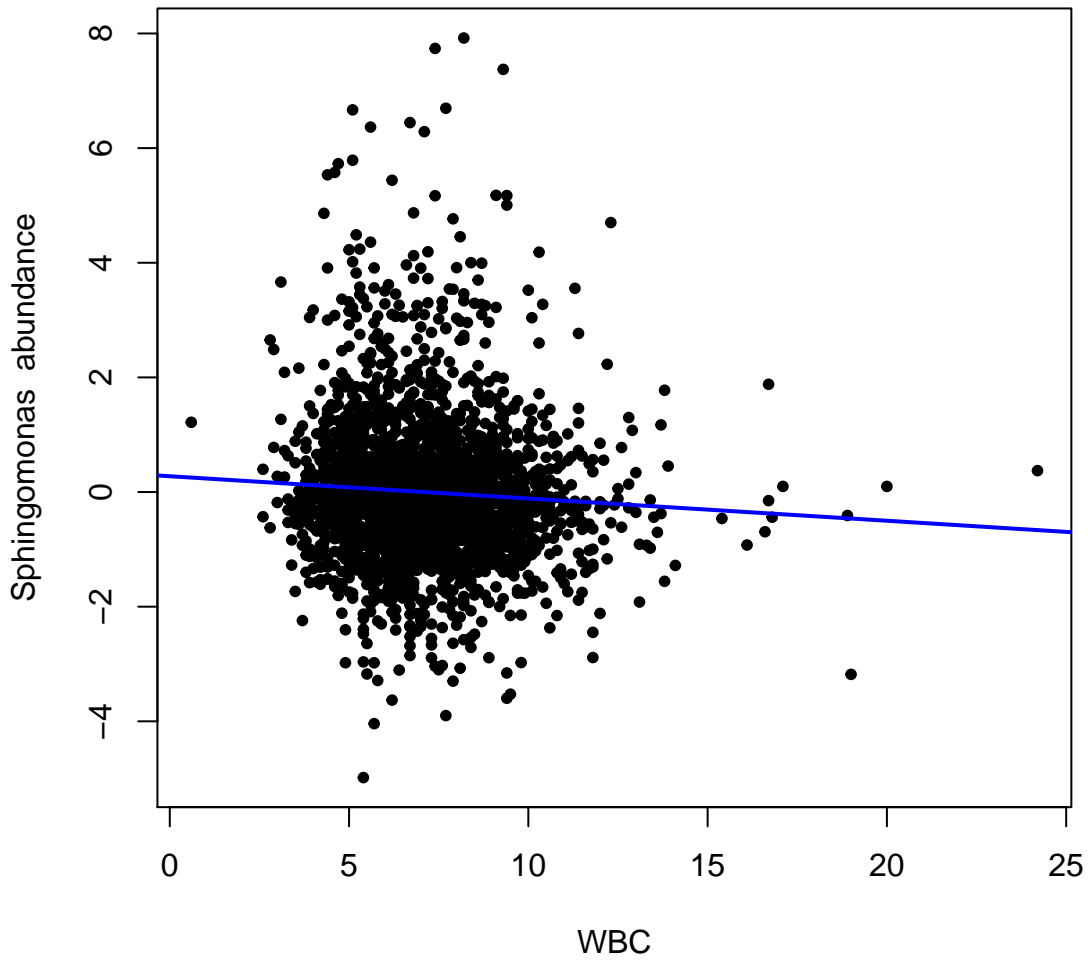

Plot of model residuals

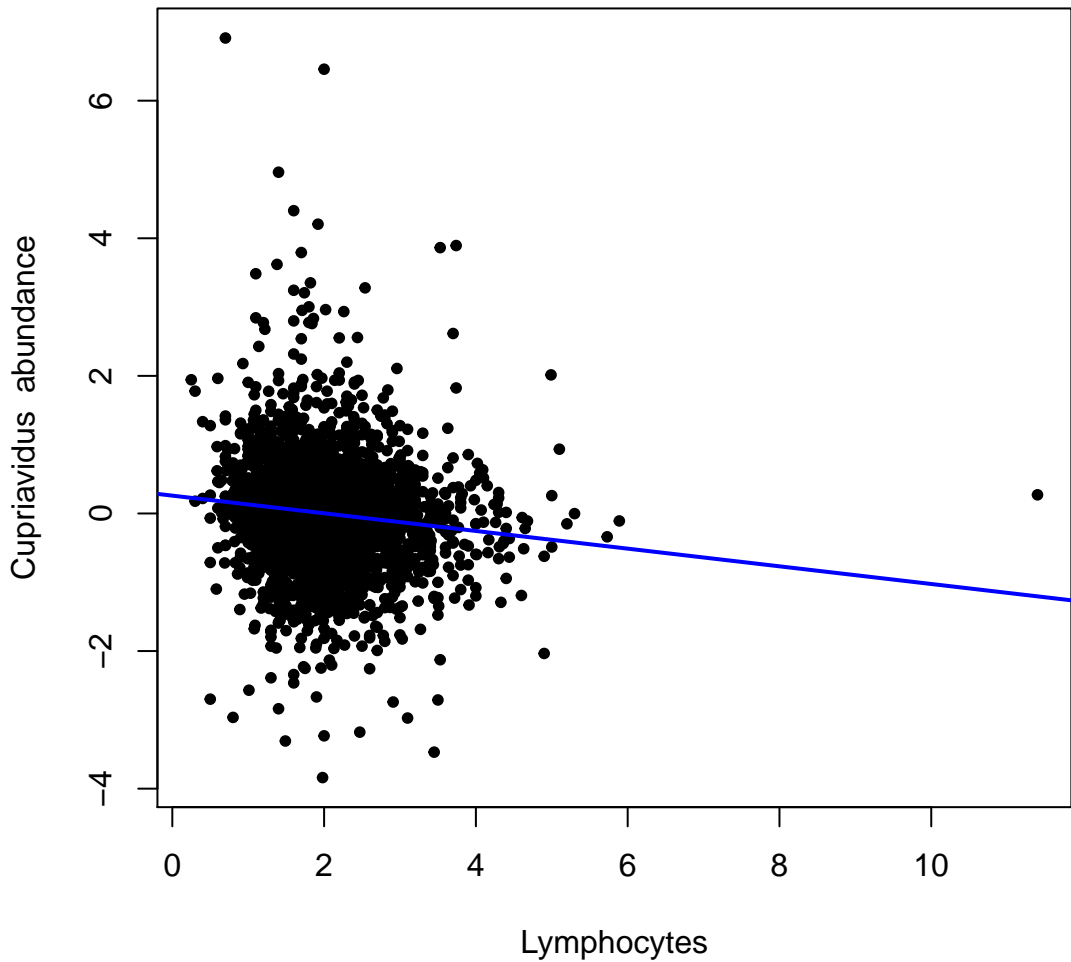

Plot of model residuals

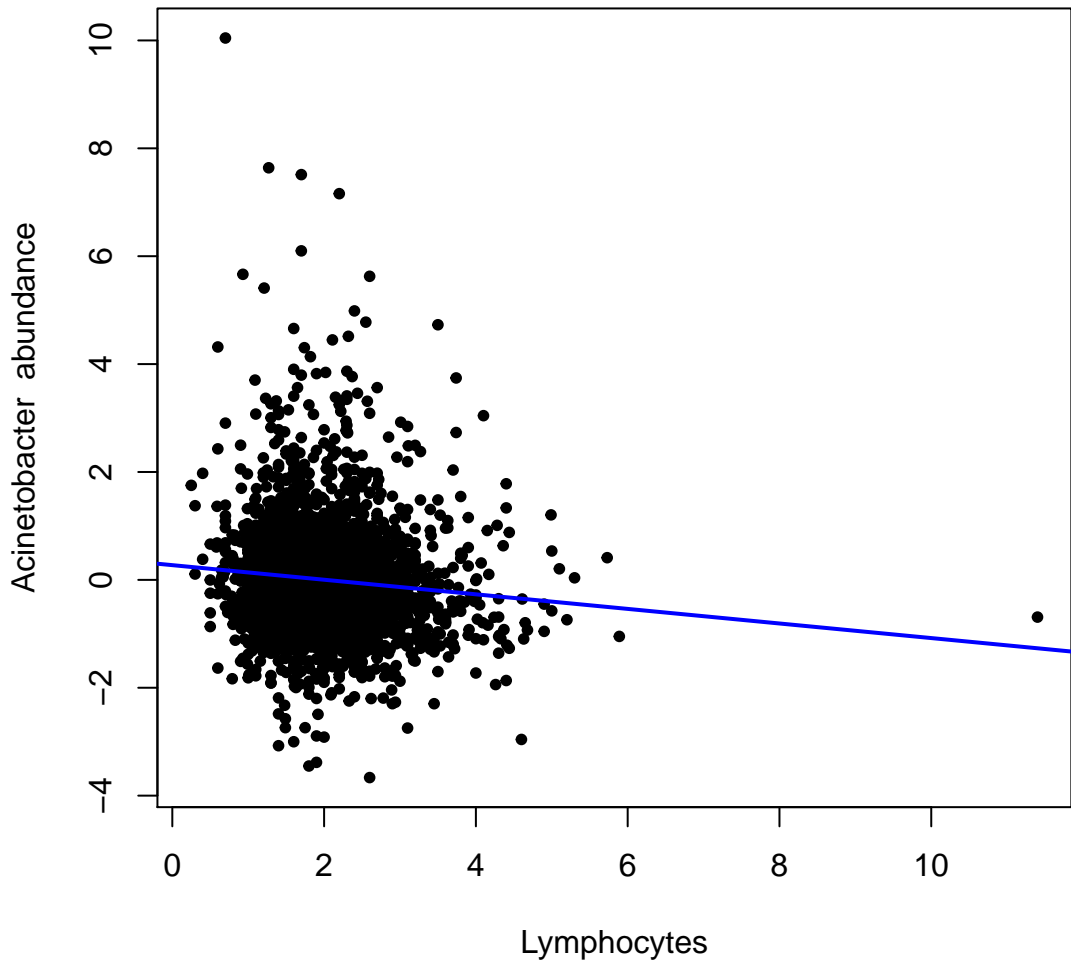

Plot of model residuals

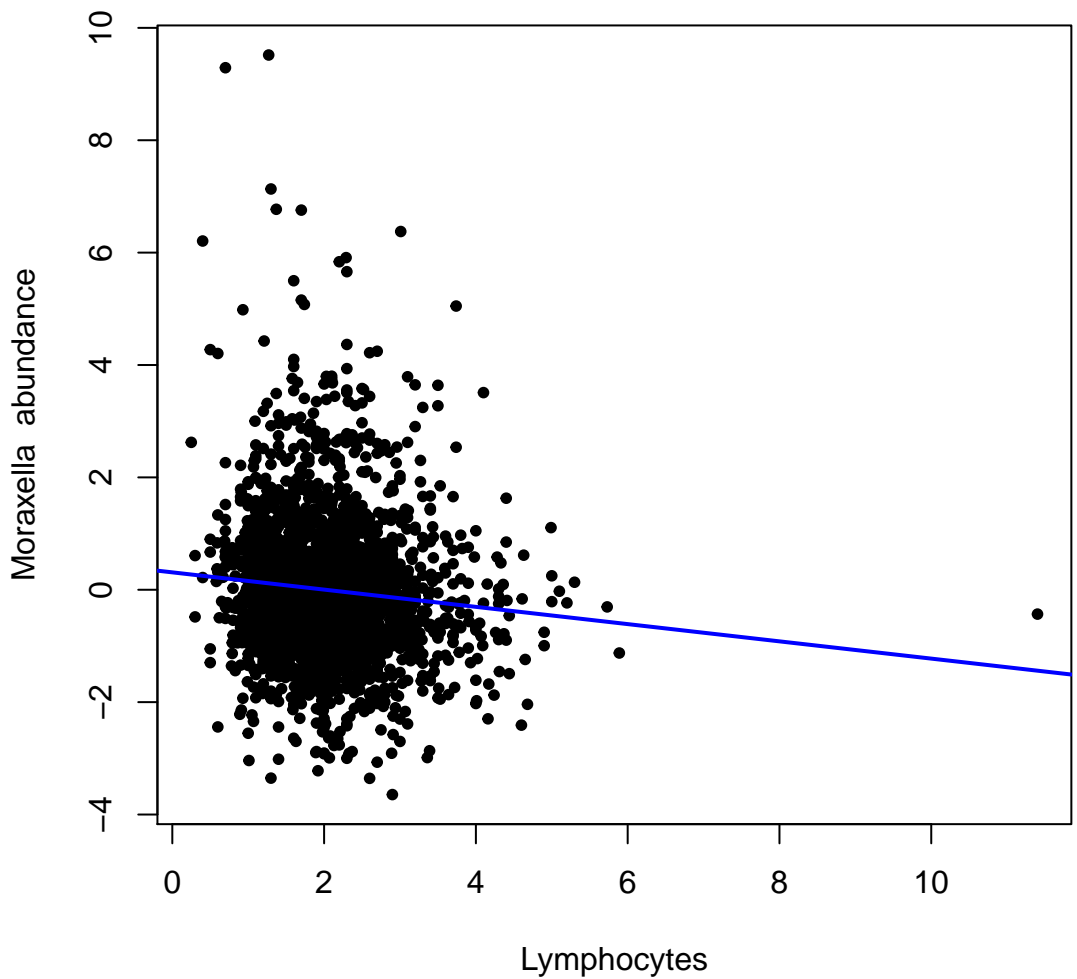

Plot of model residuals

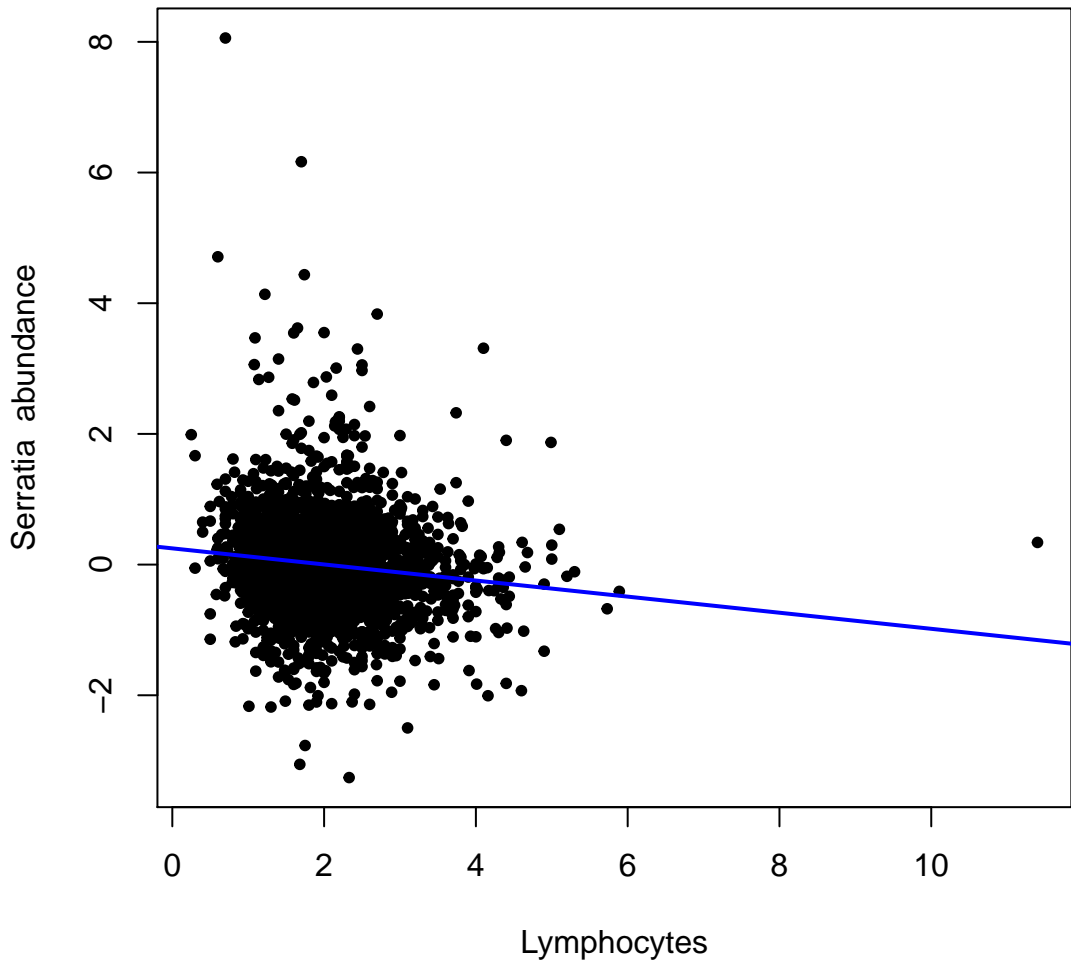



Plot of model residuals

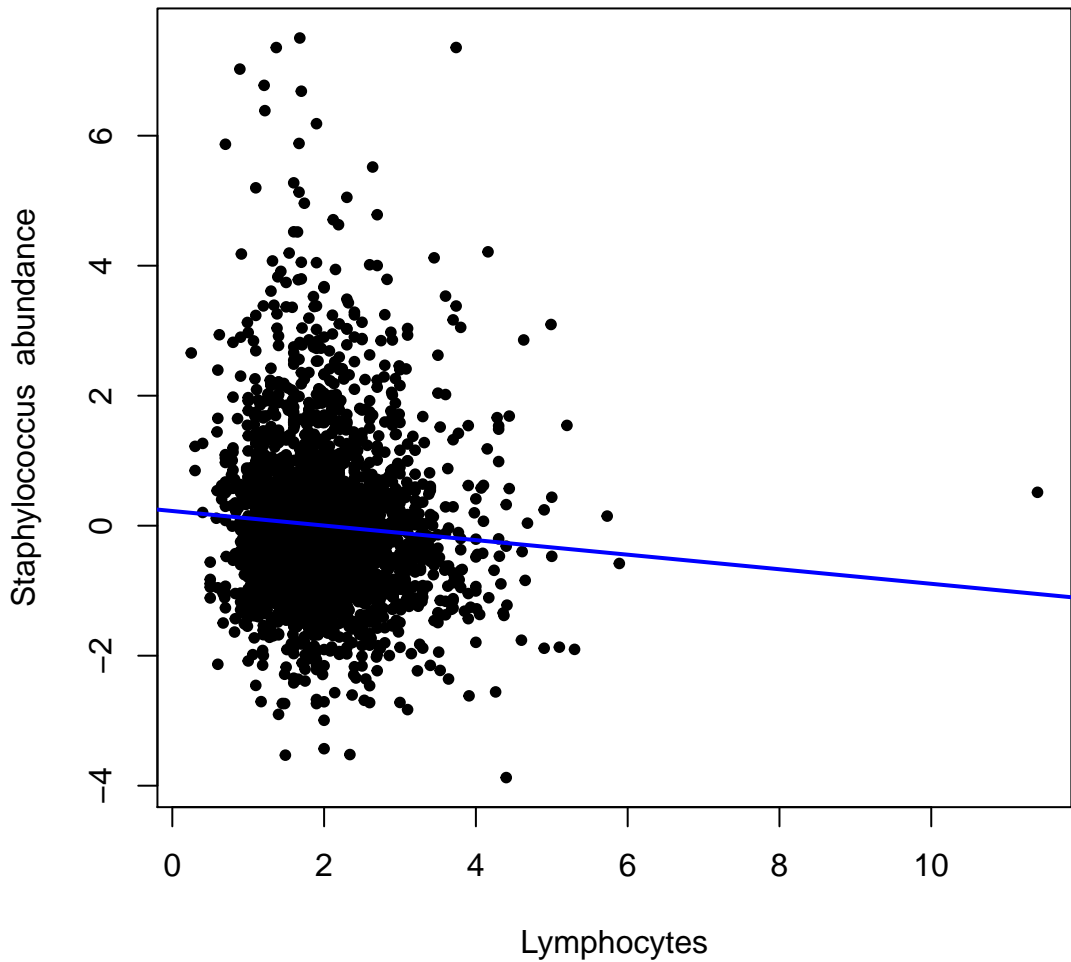

Plot of model residuals

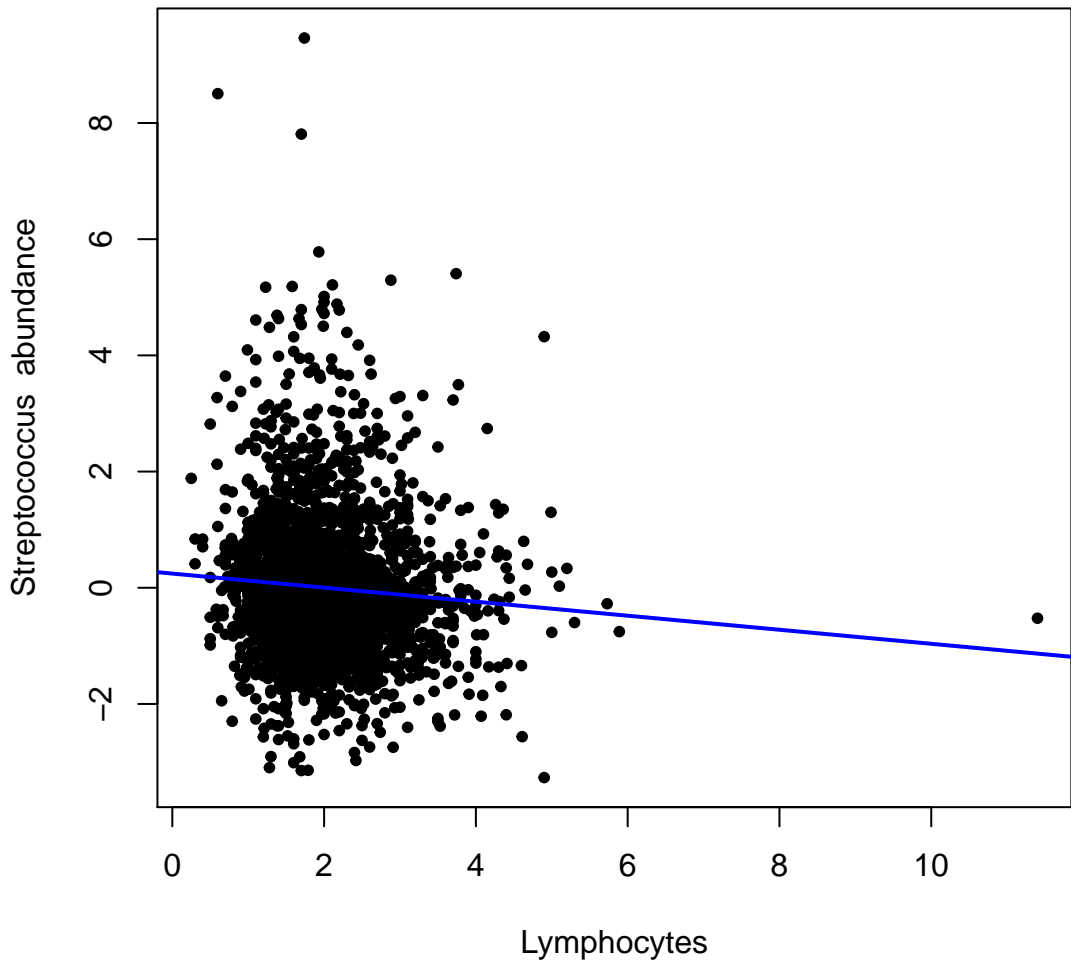

Plot of model residuals

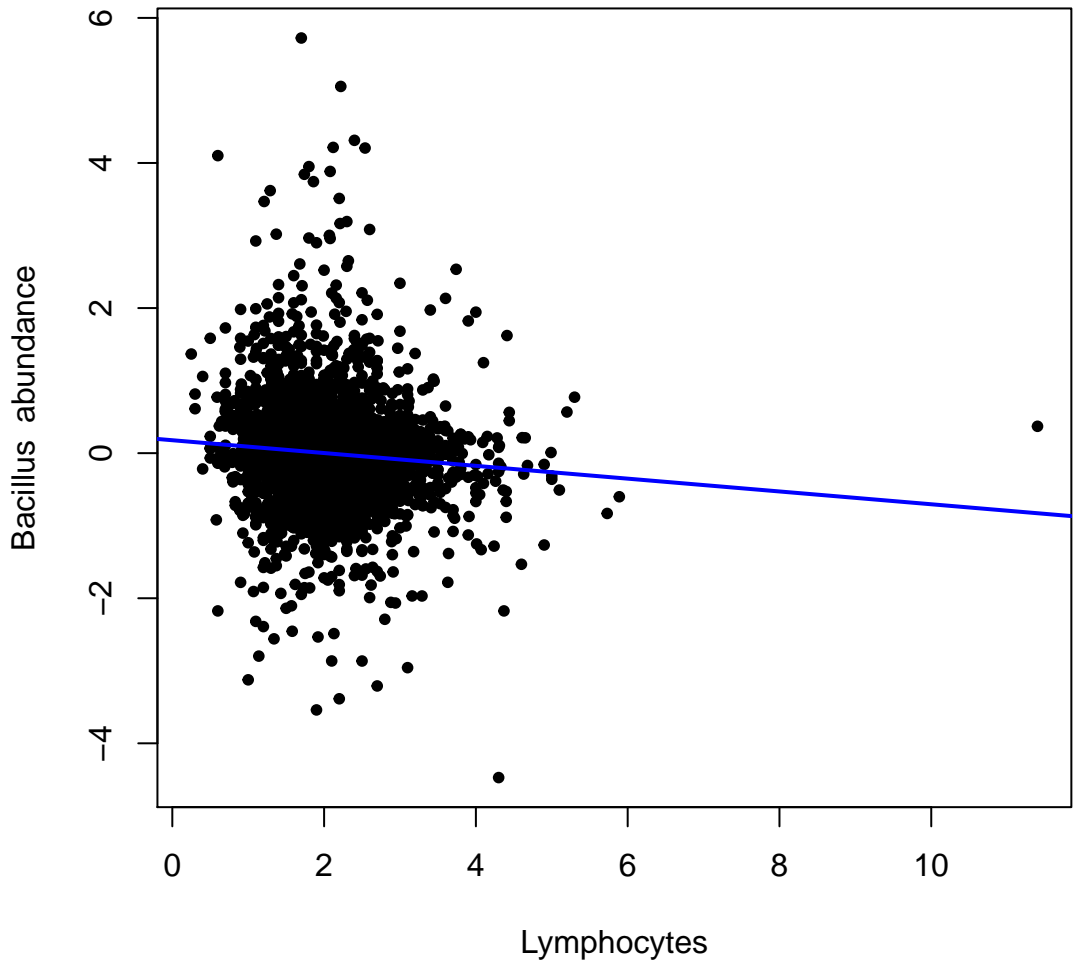

Plot of model residuals

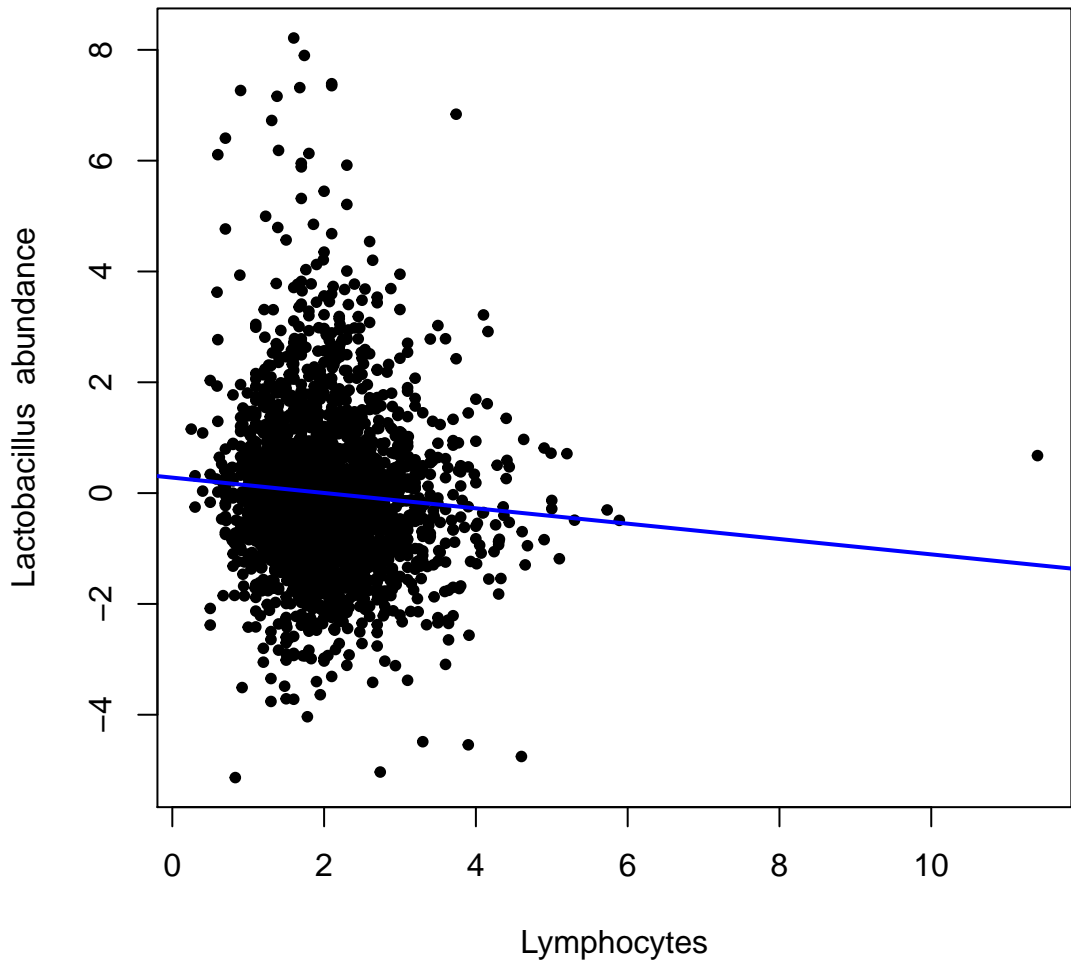

Plot of model residuals

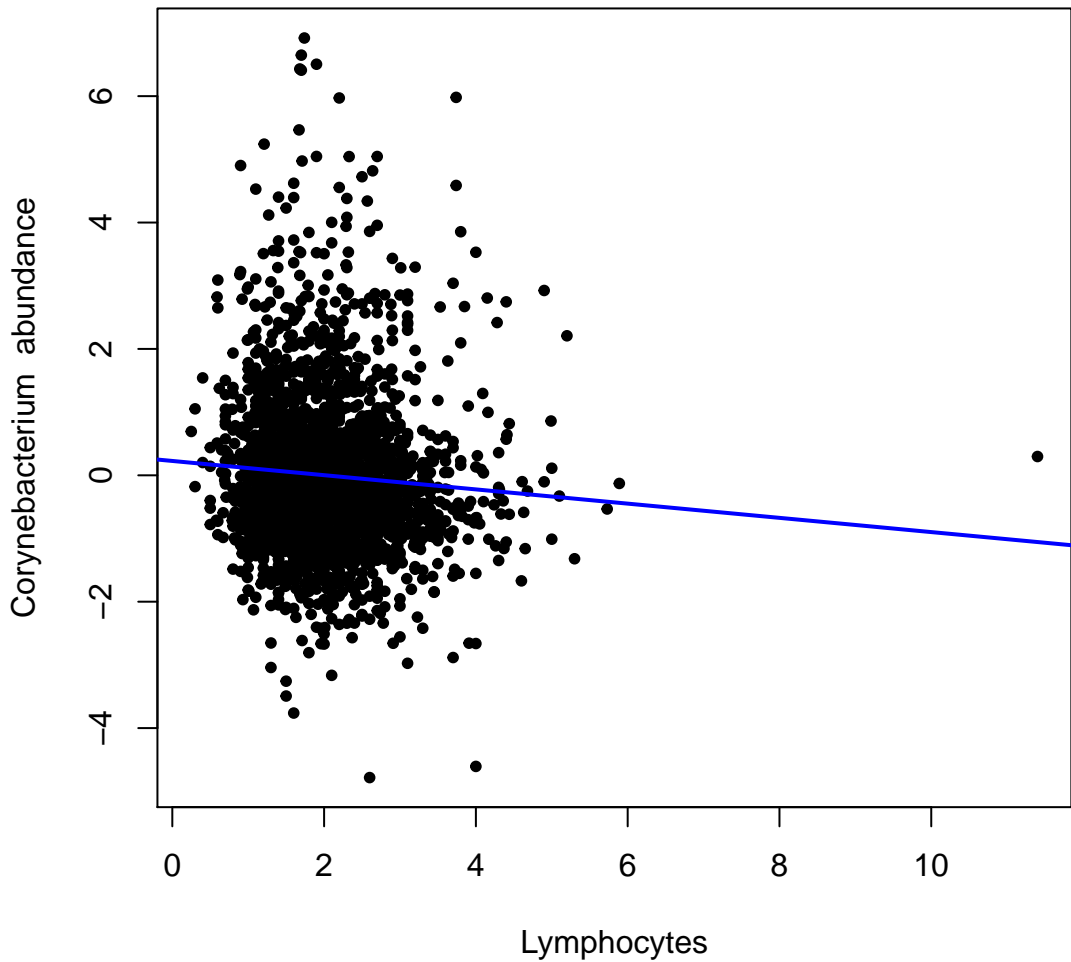

Plot of model residuals

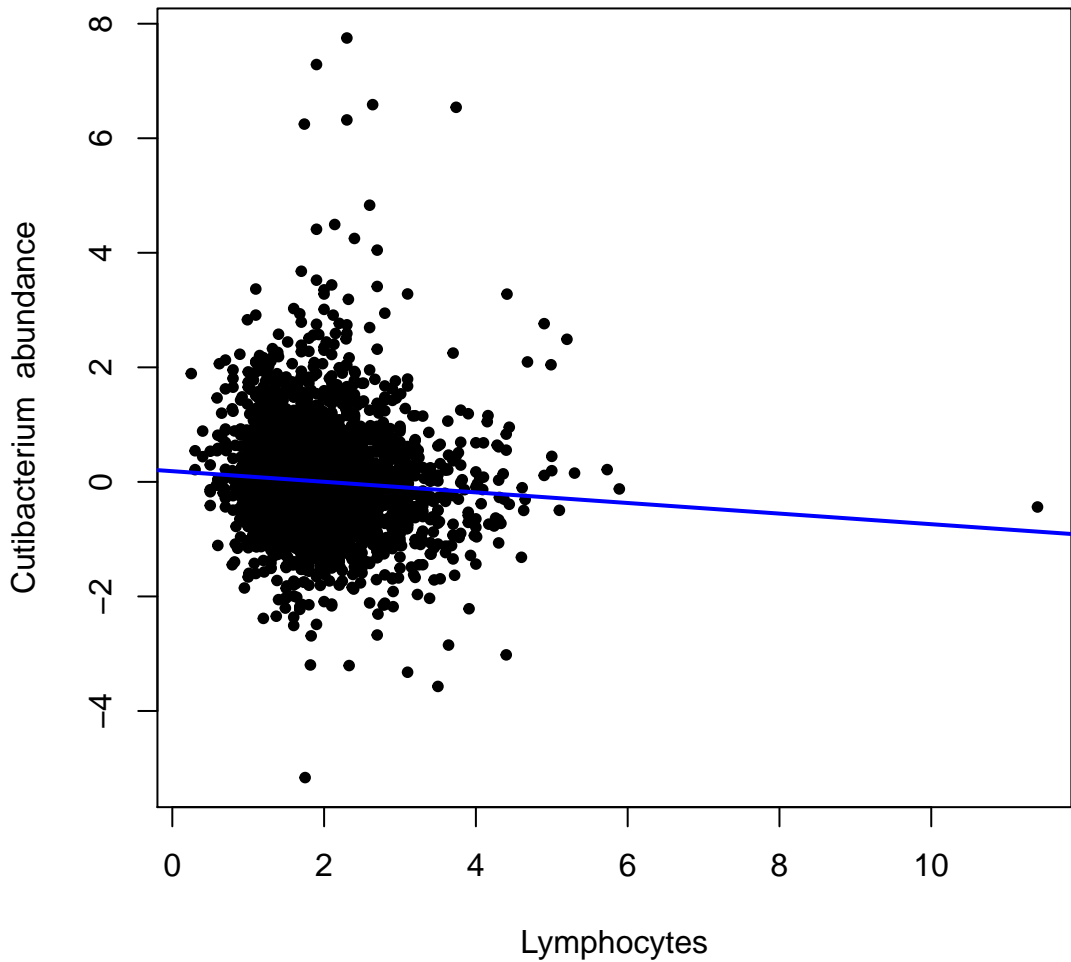

Plot of model residuals

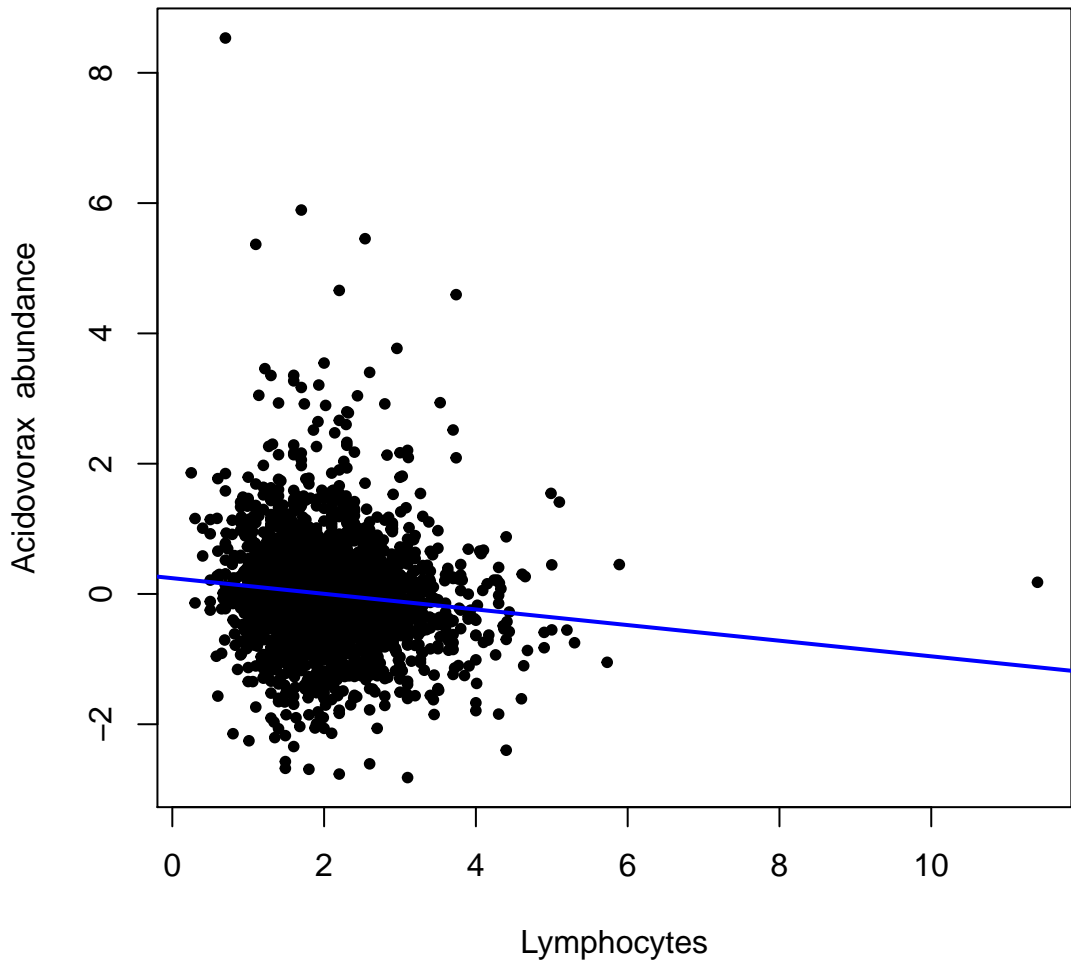

Plot of model residuals

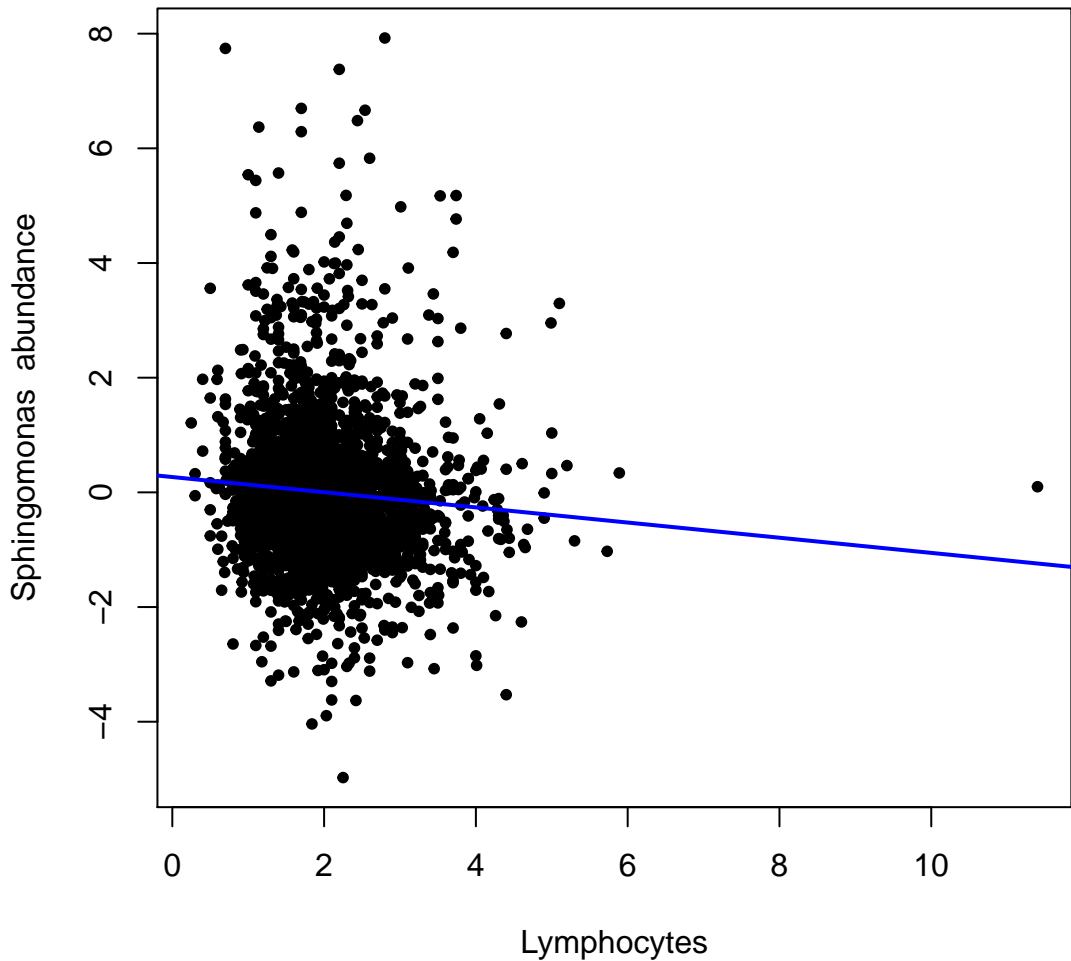



Plot of model residuals

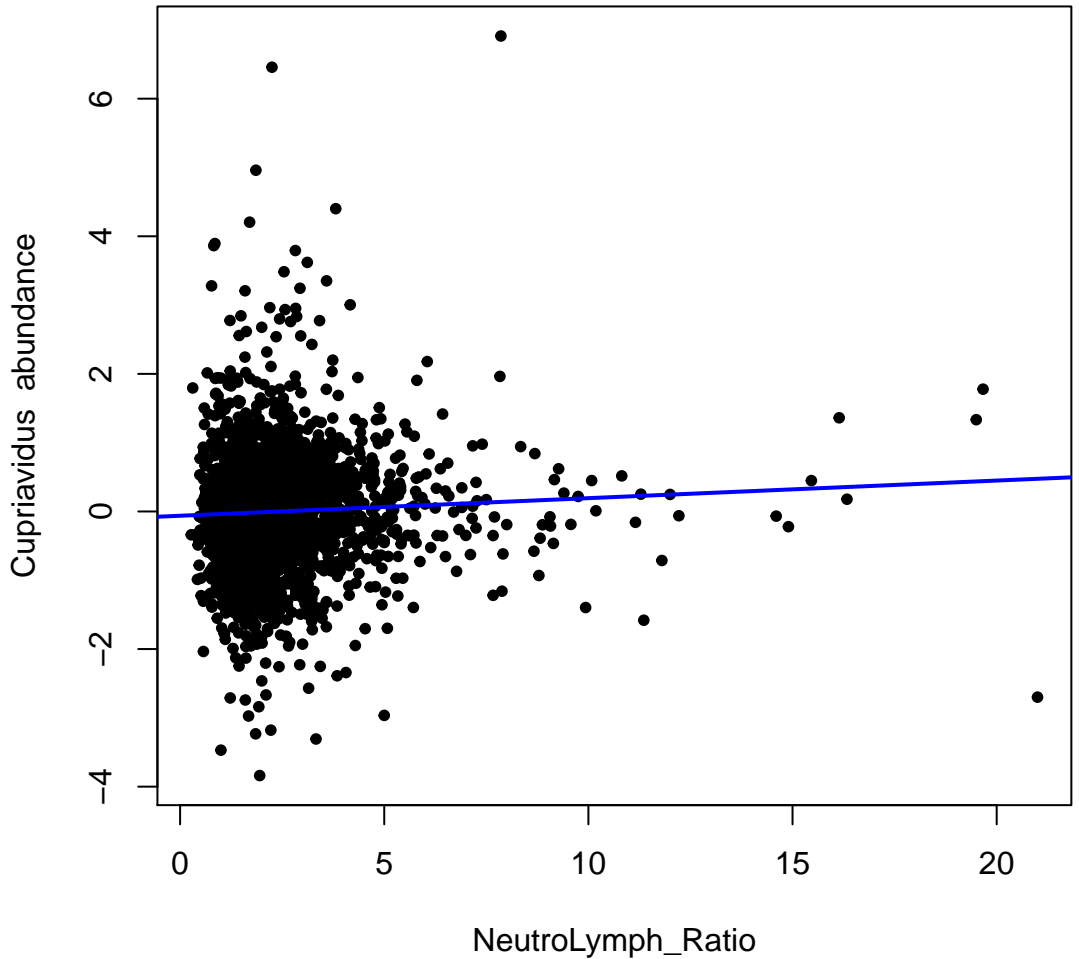

Plot of model residuals

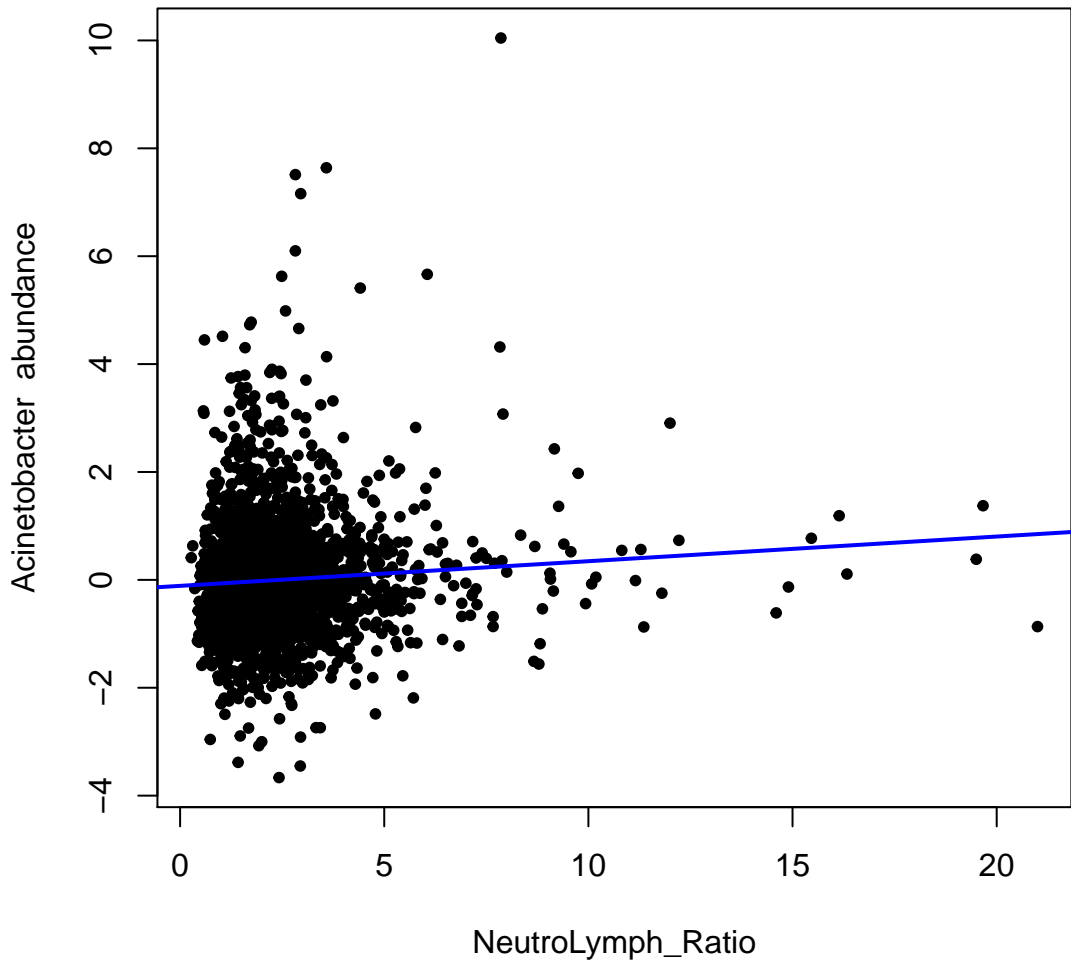

Plot of model residuals

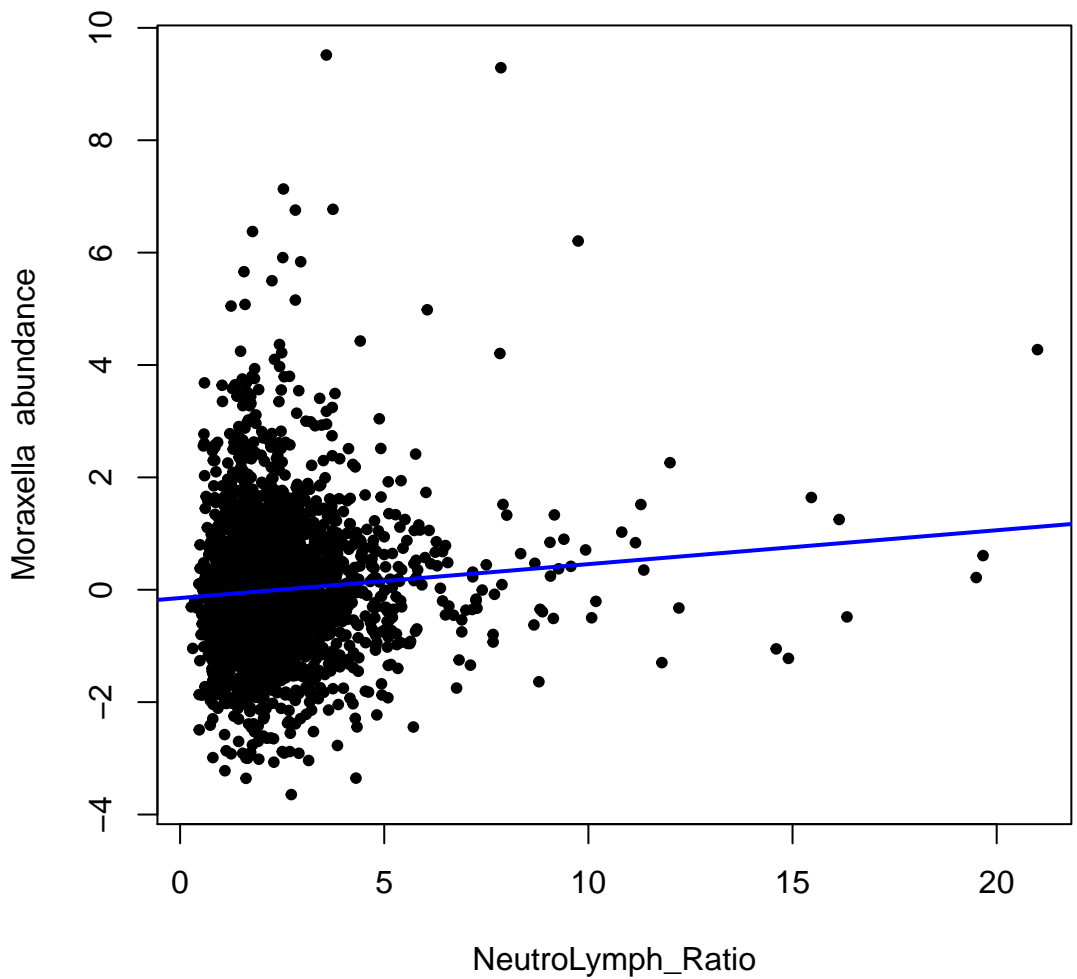

Plot of model residuals

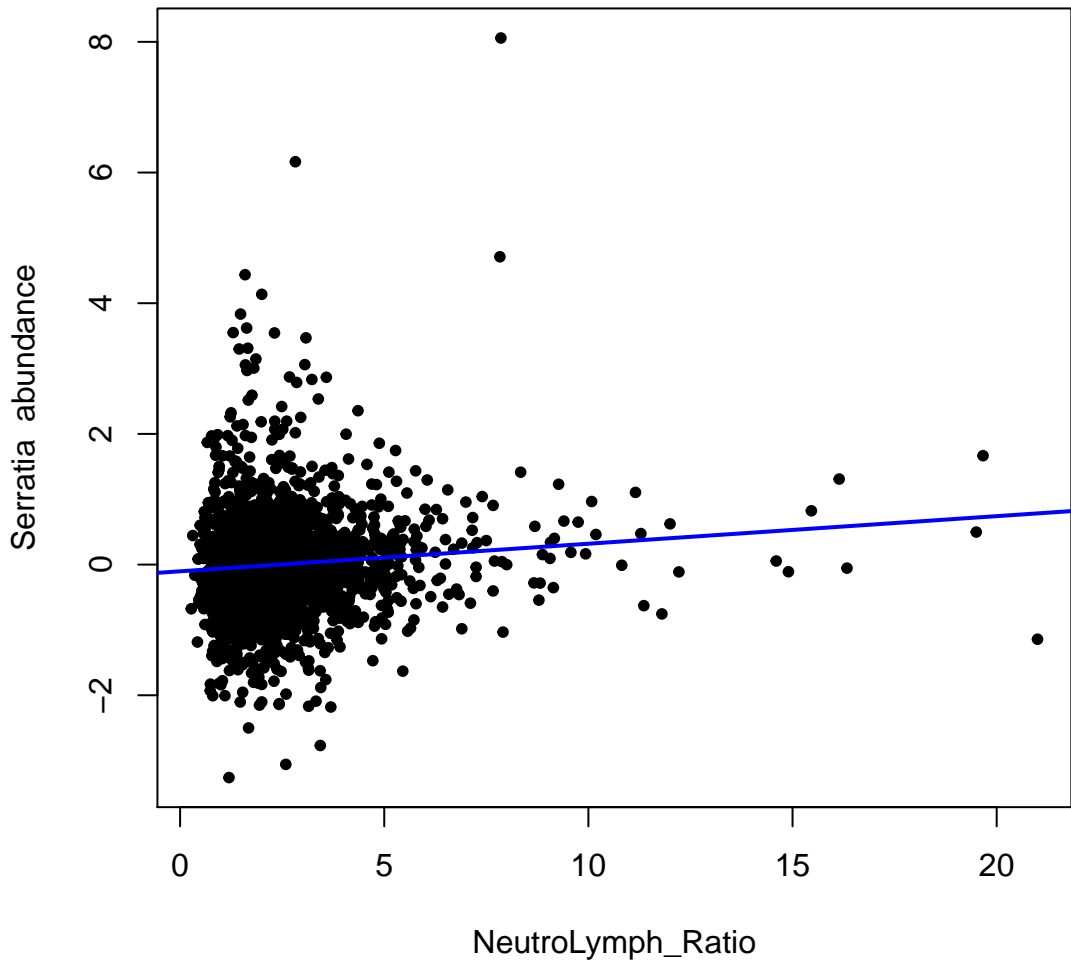

Plot of model residuals

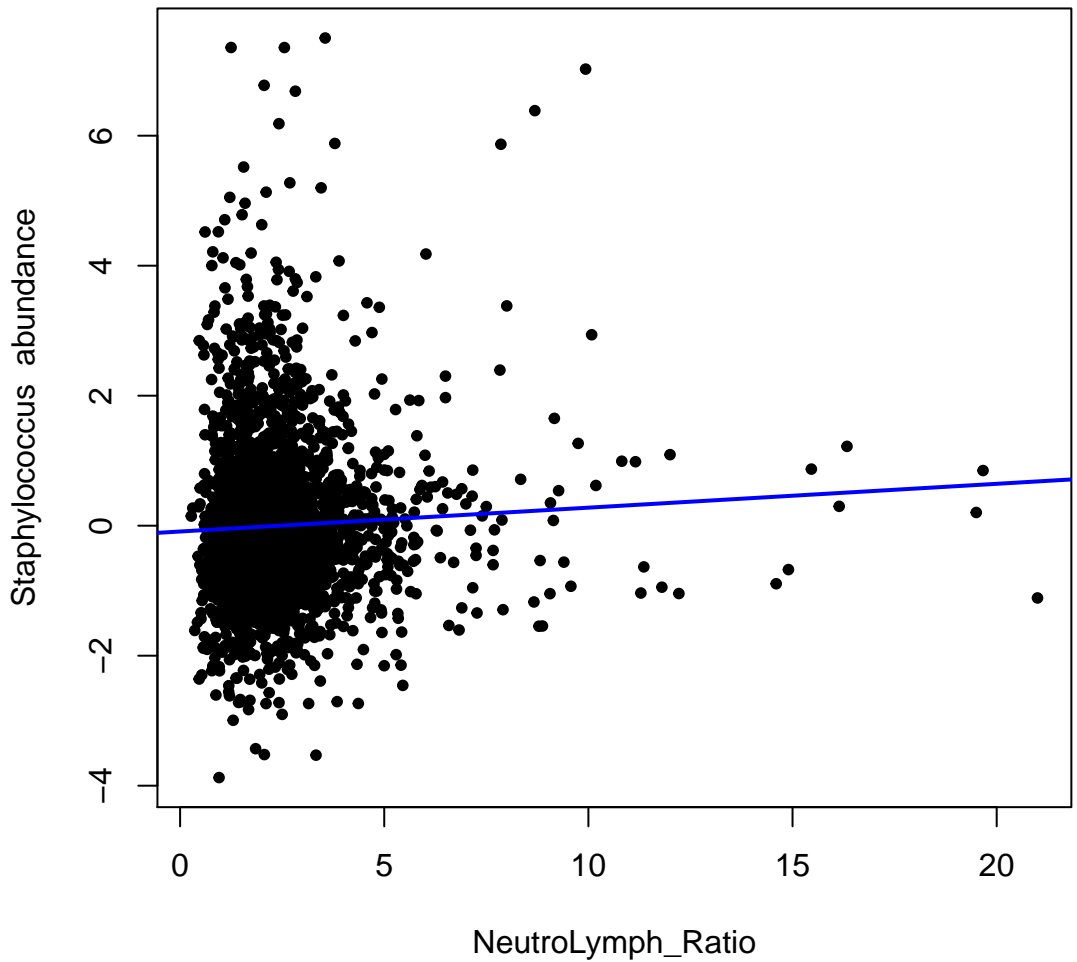

Plot of model residuals

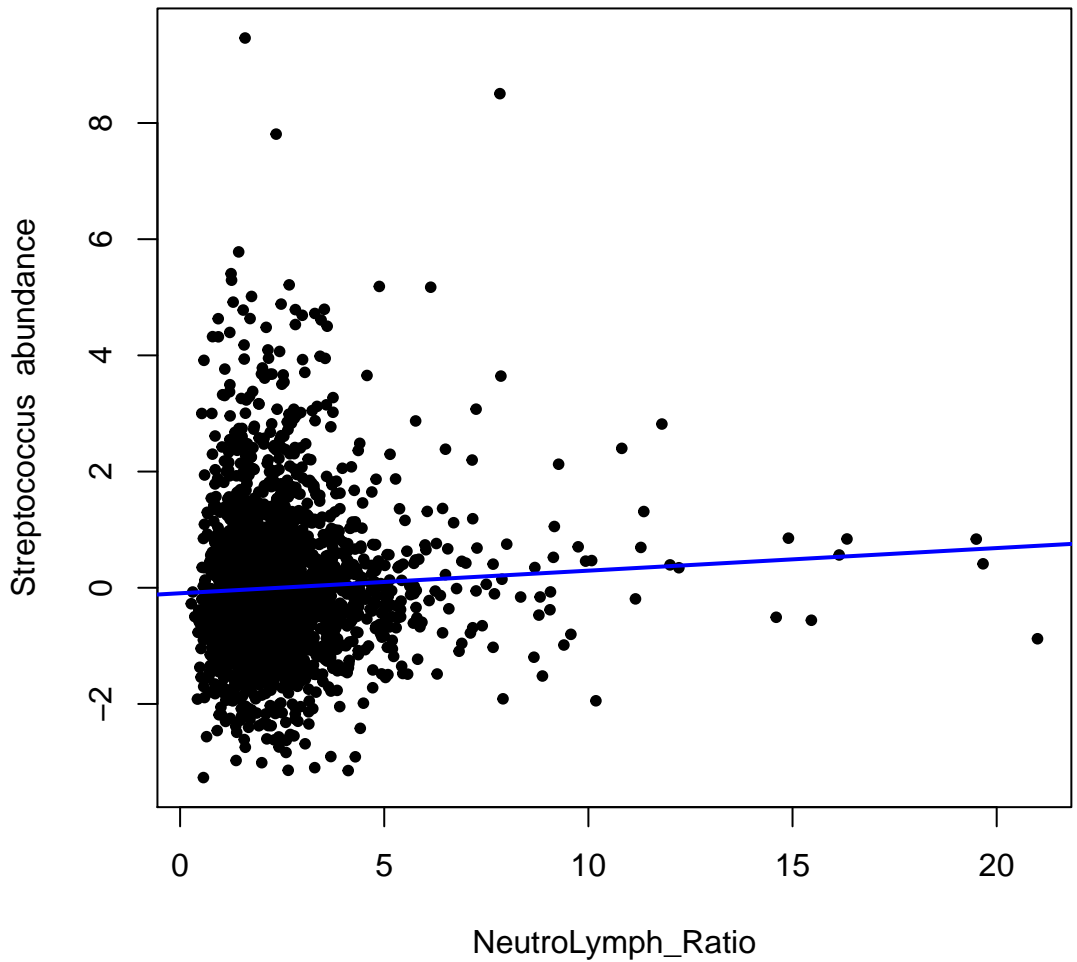

Plot of model residuals

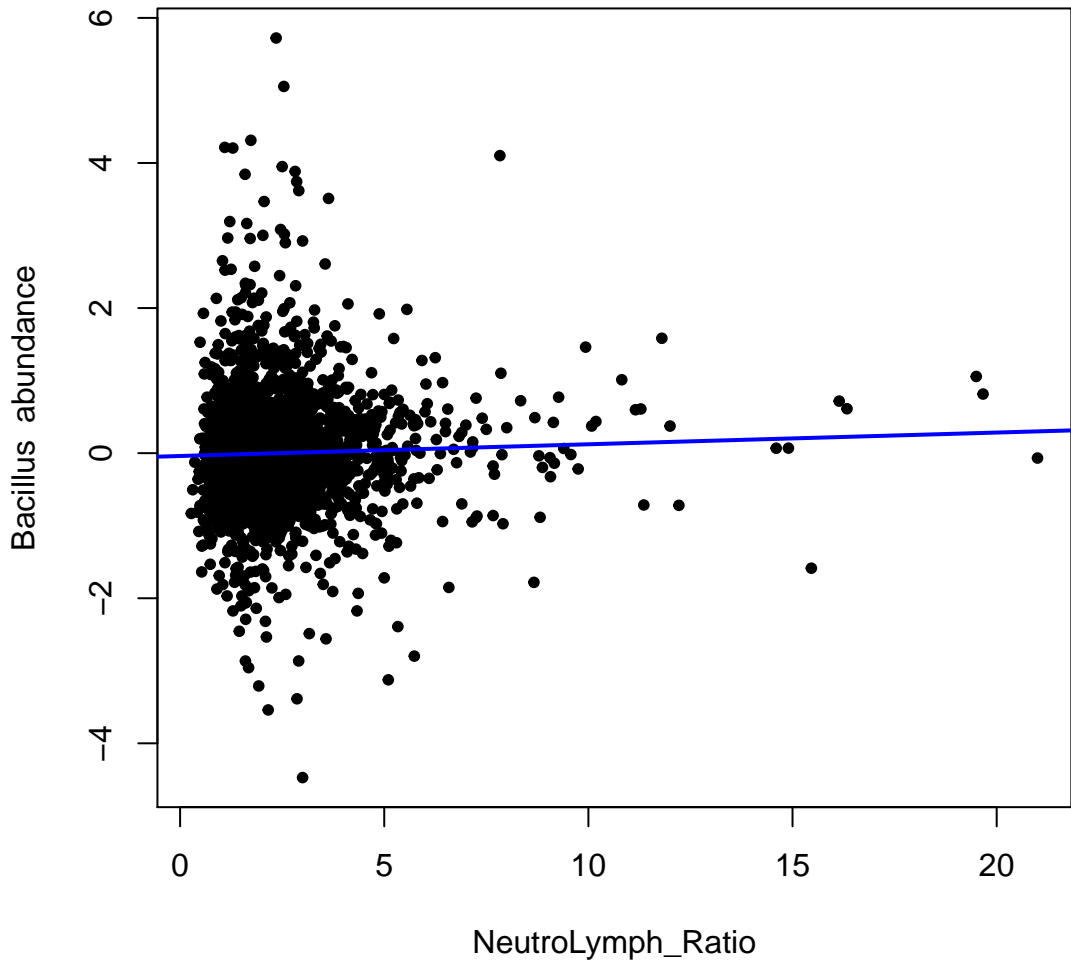

Plot of model residuals

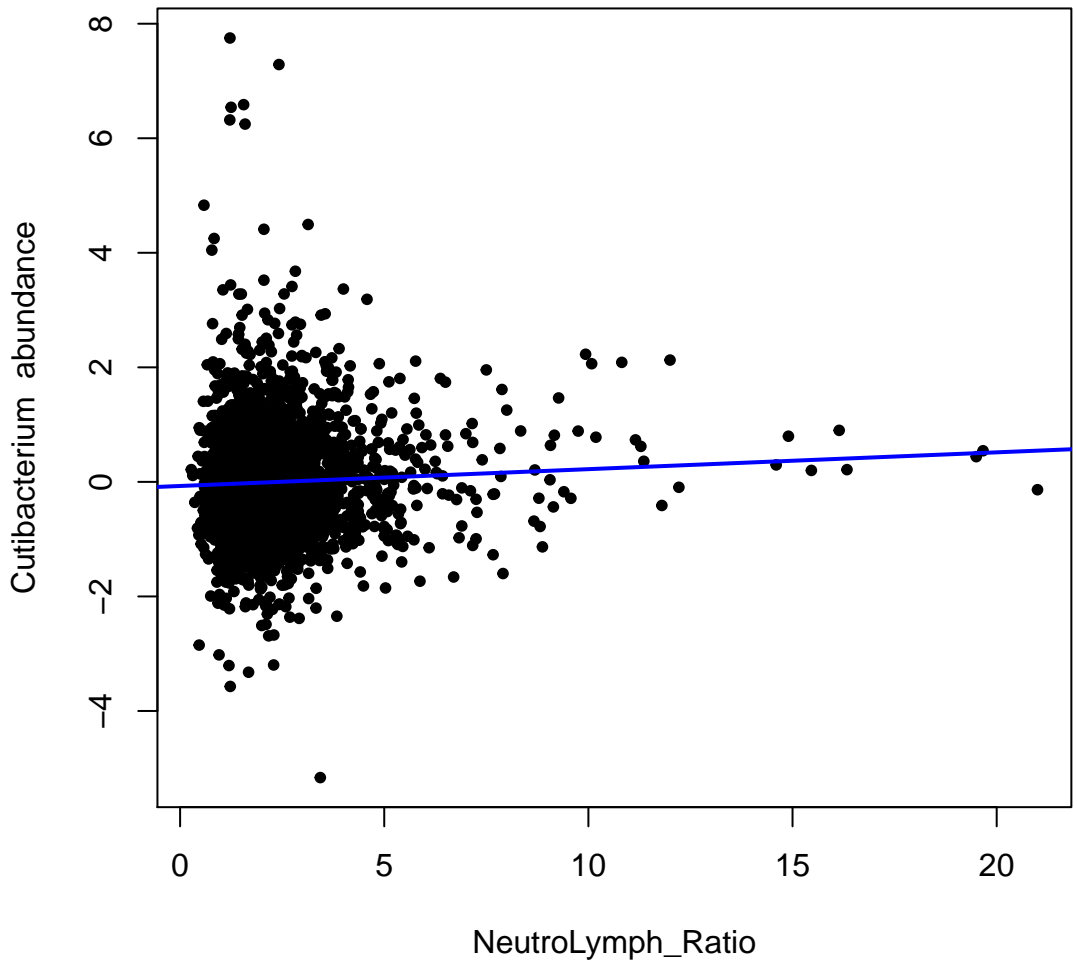



**Plot of model residuals**

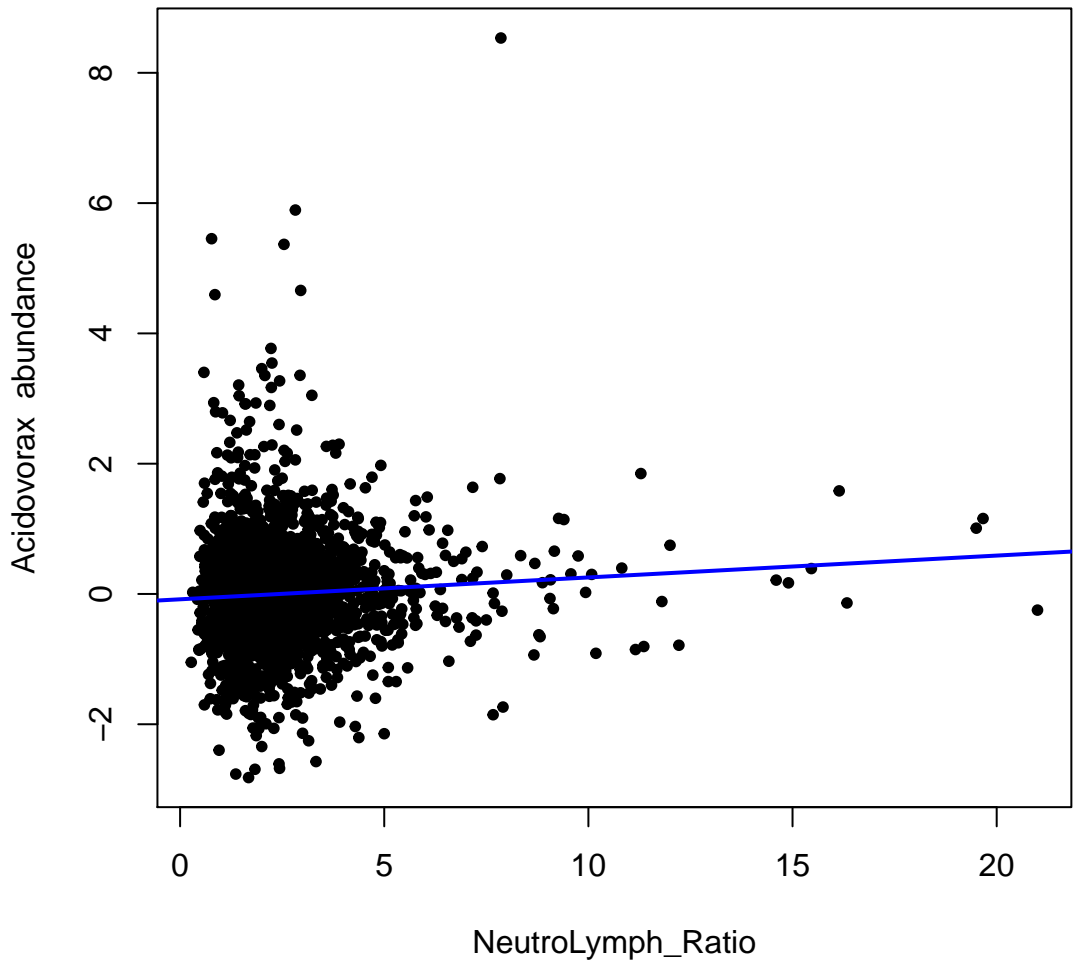

Plot of model residuals

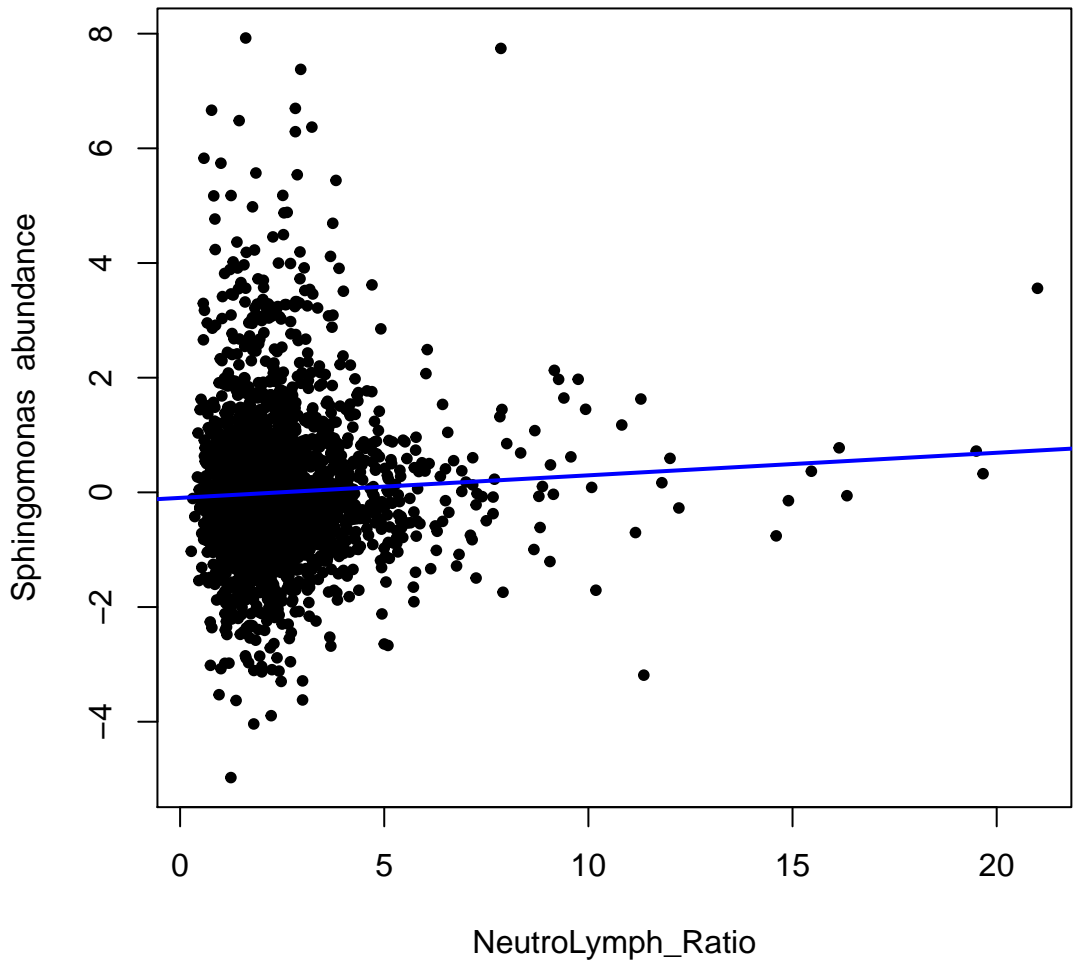

Plot of model residuals

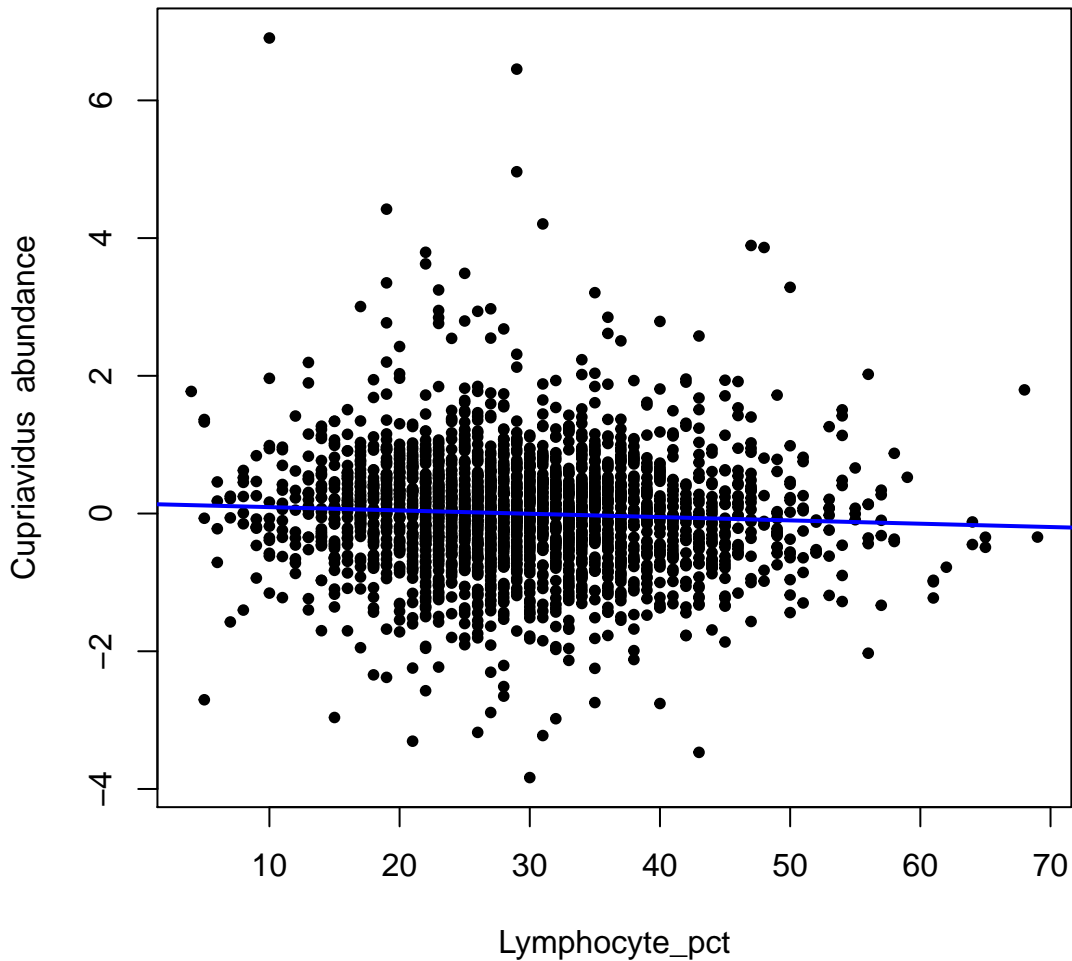

Plot of model residuals

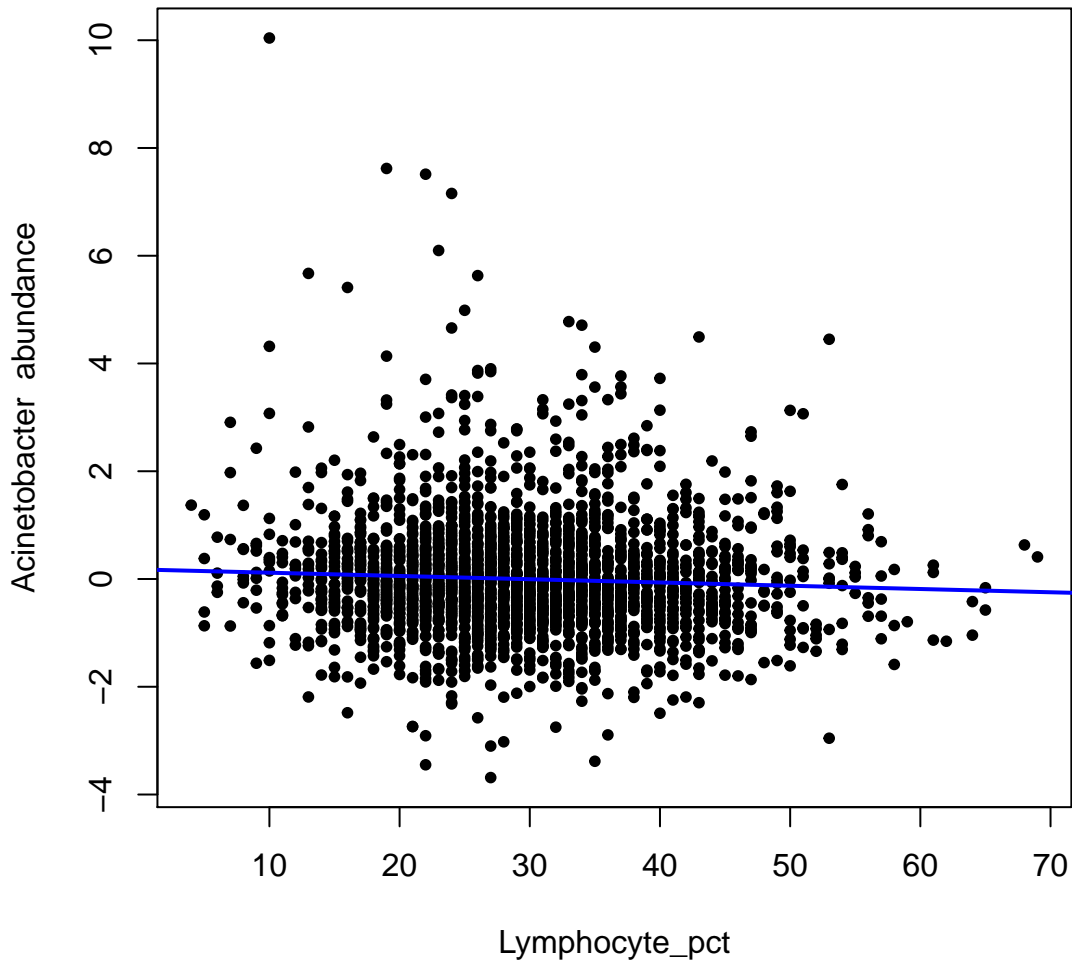

Plot of model residuals

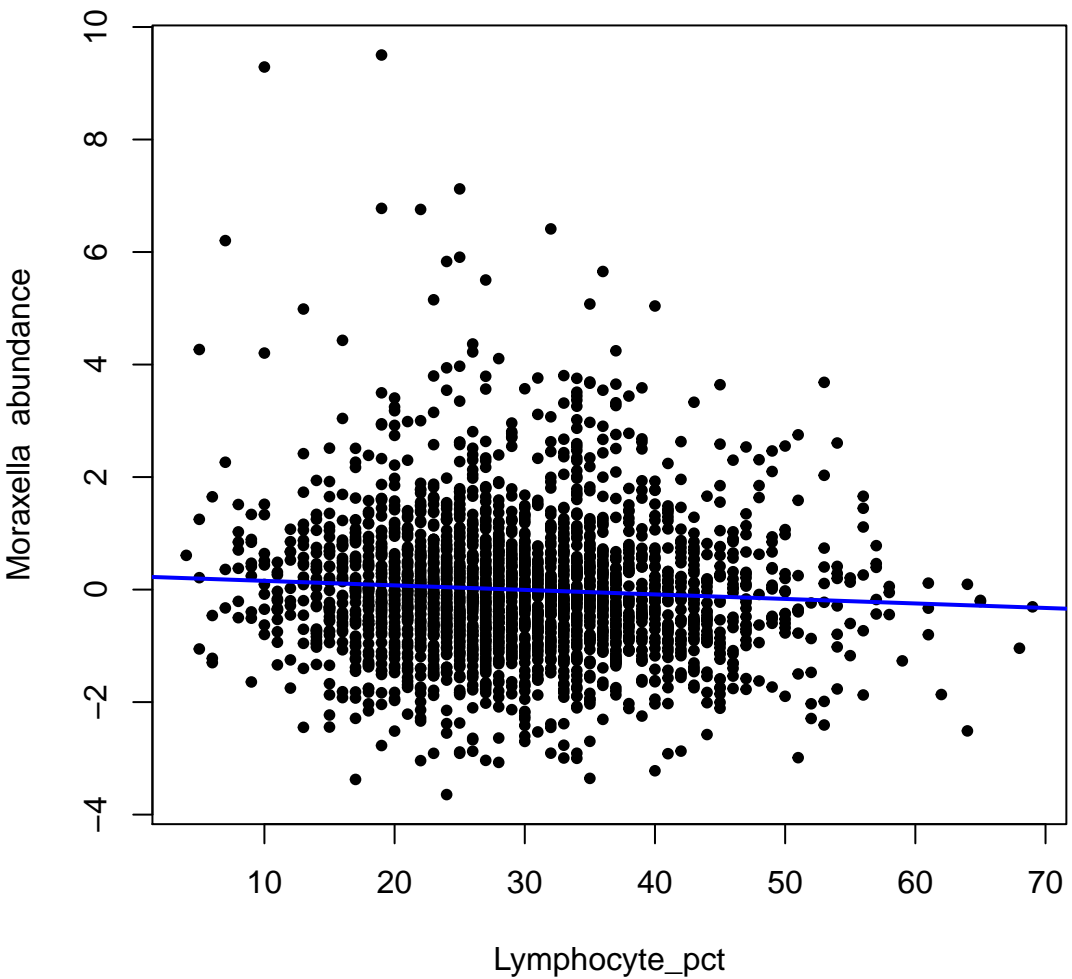

Plot of model residuals

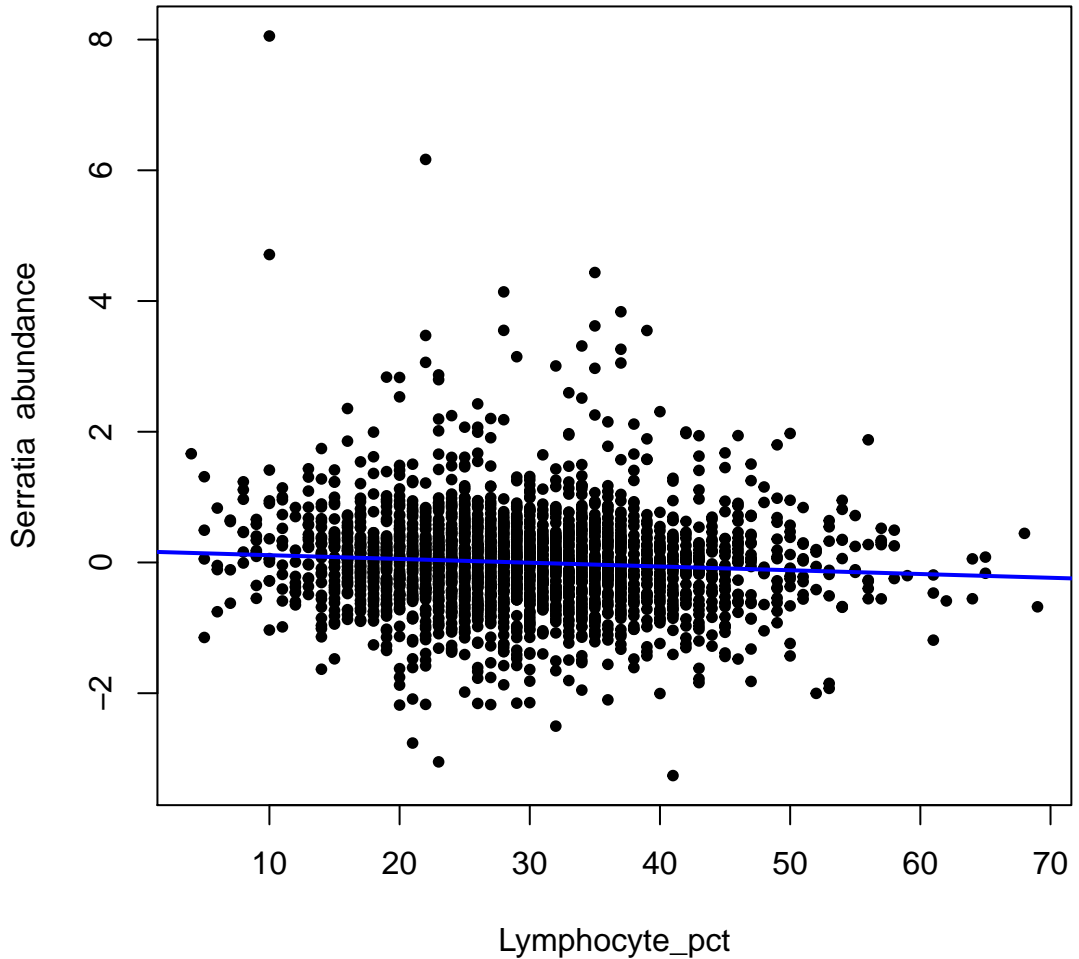

Plot of model residuals

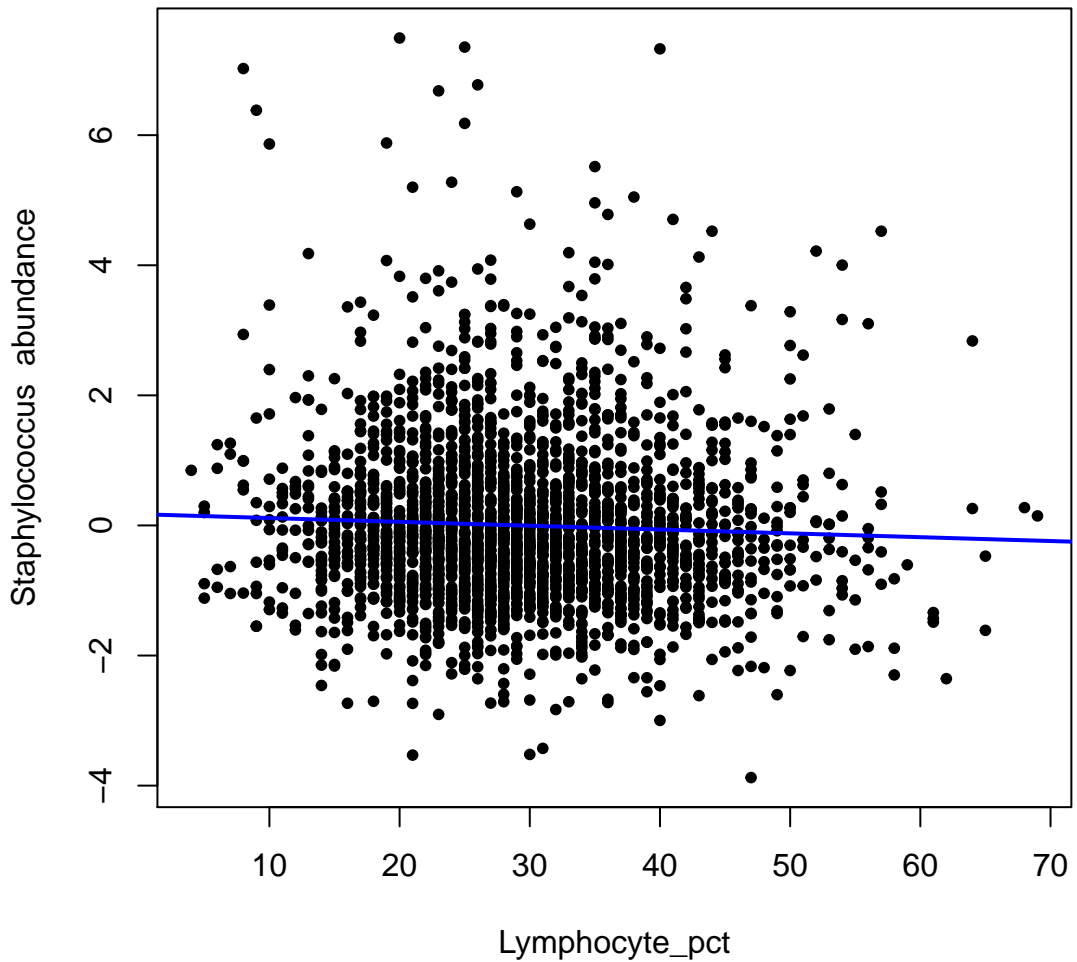

Plot of model residuals

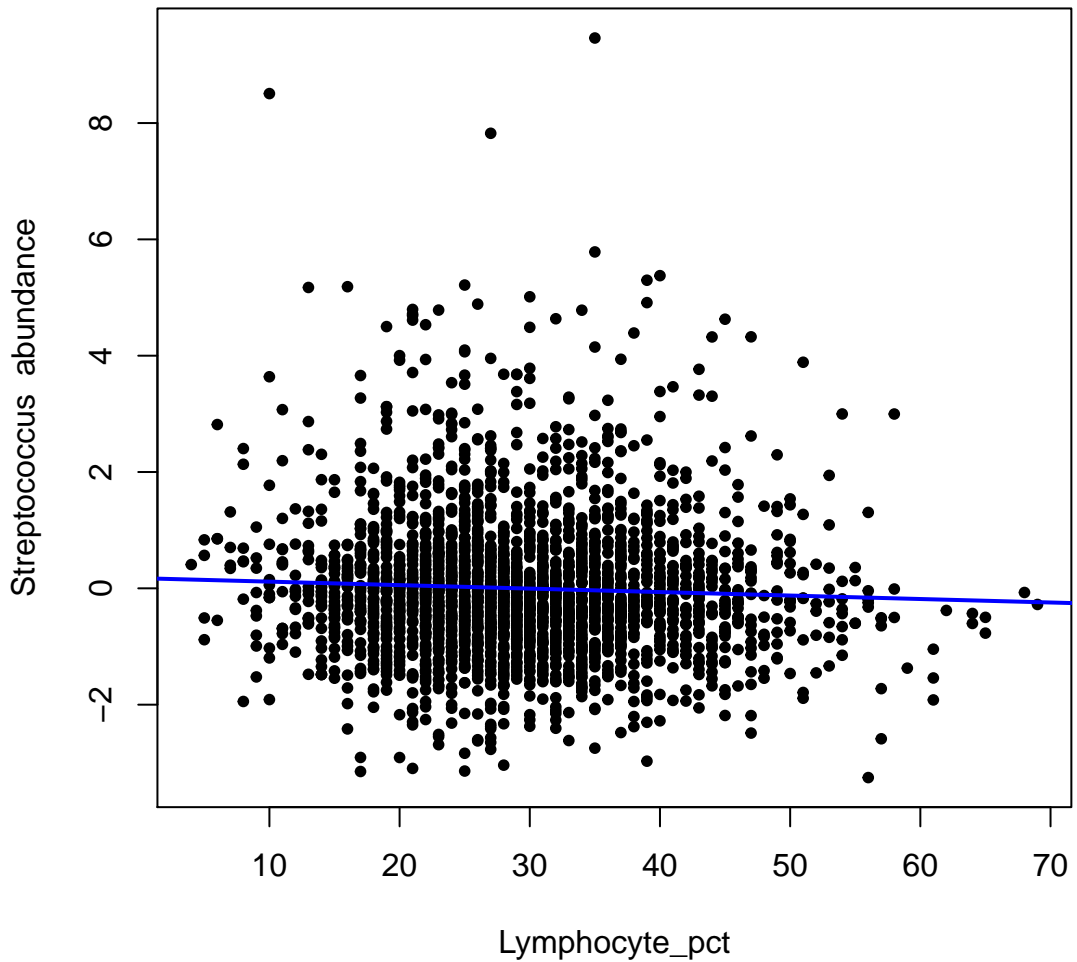



Plot of model residuals

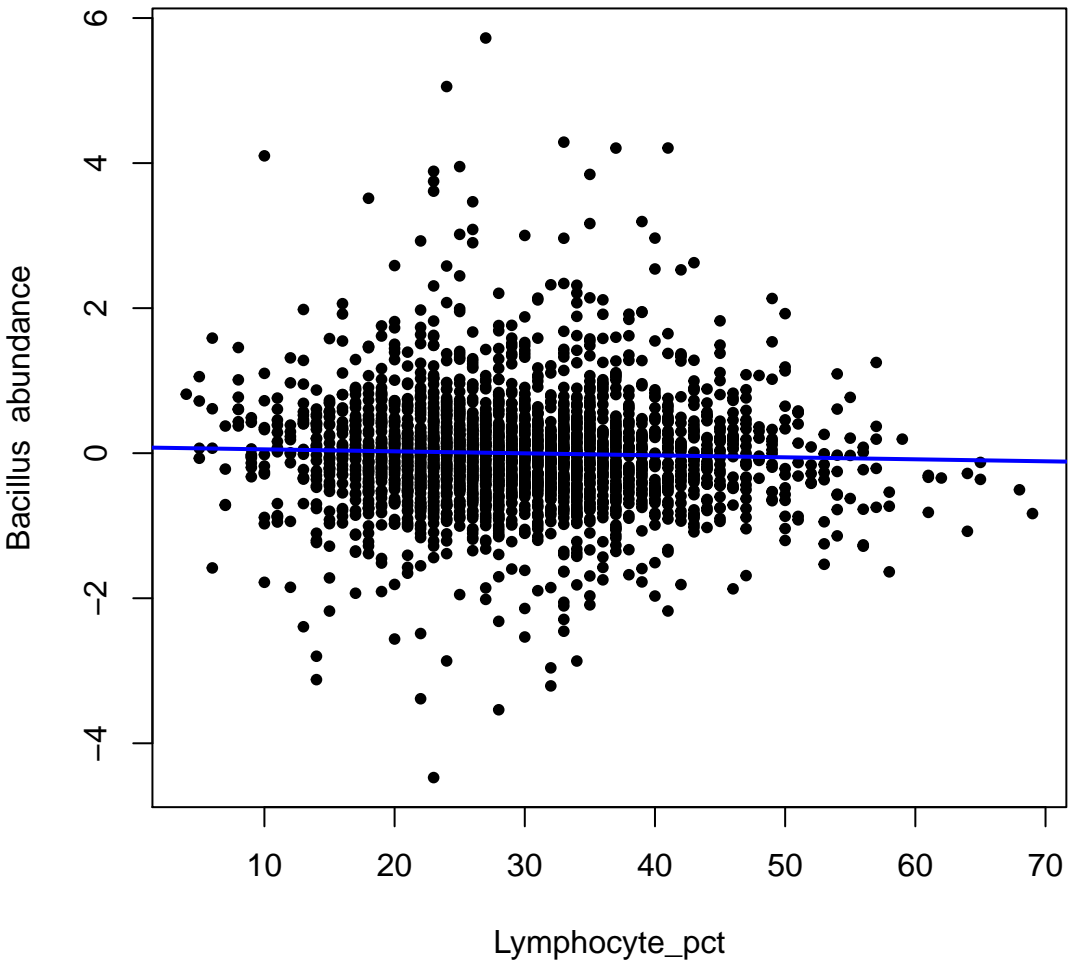

Plot of model residuals

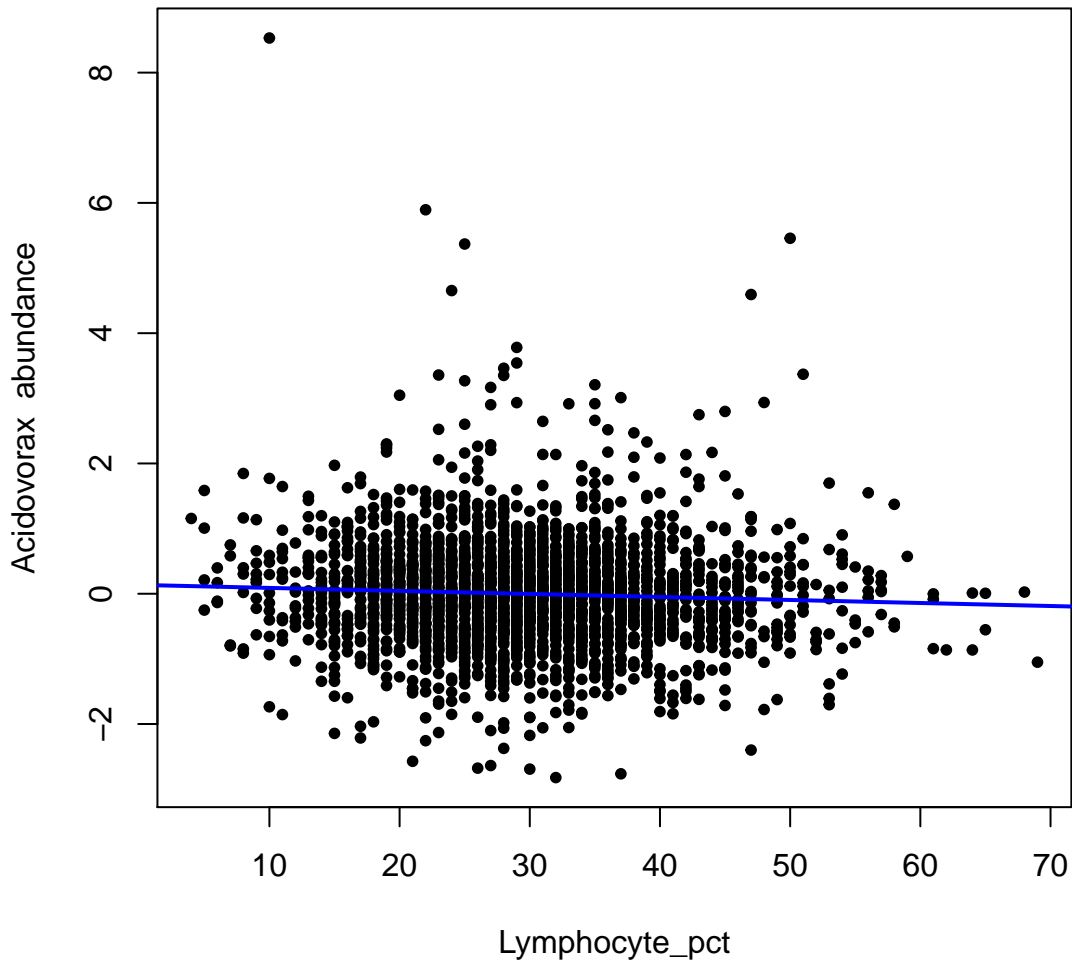

Plot of model residuals

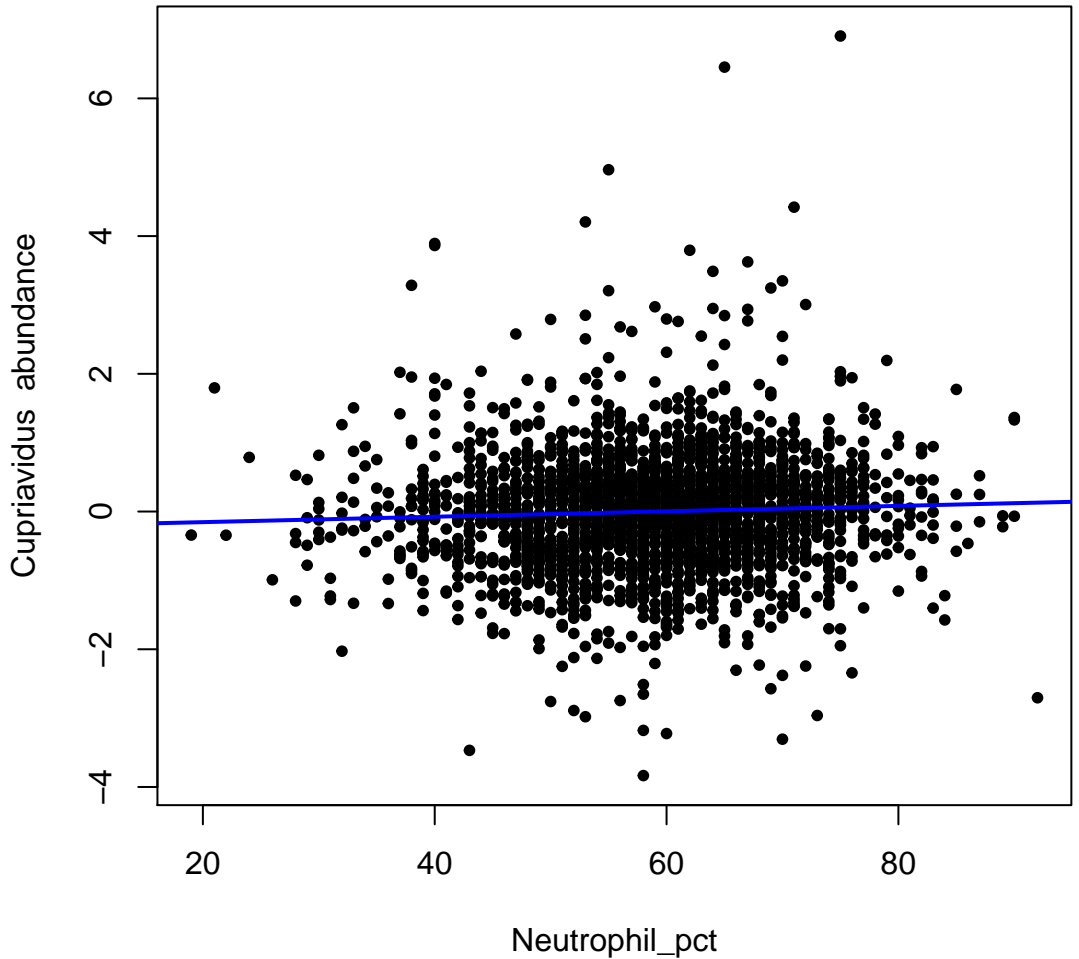

Plot of model residuals

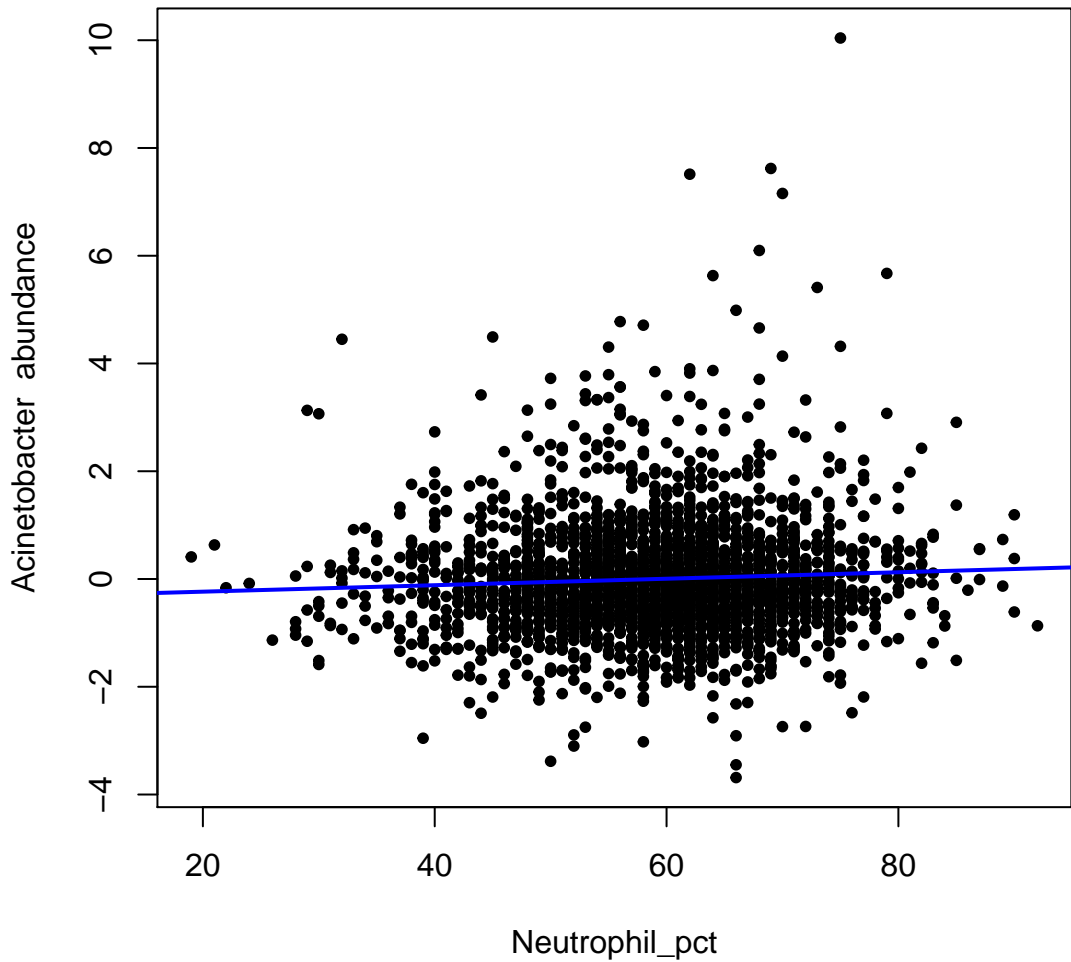

Plot of model residuals

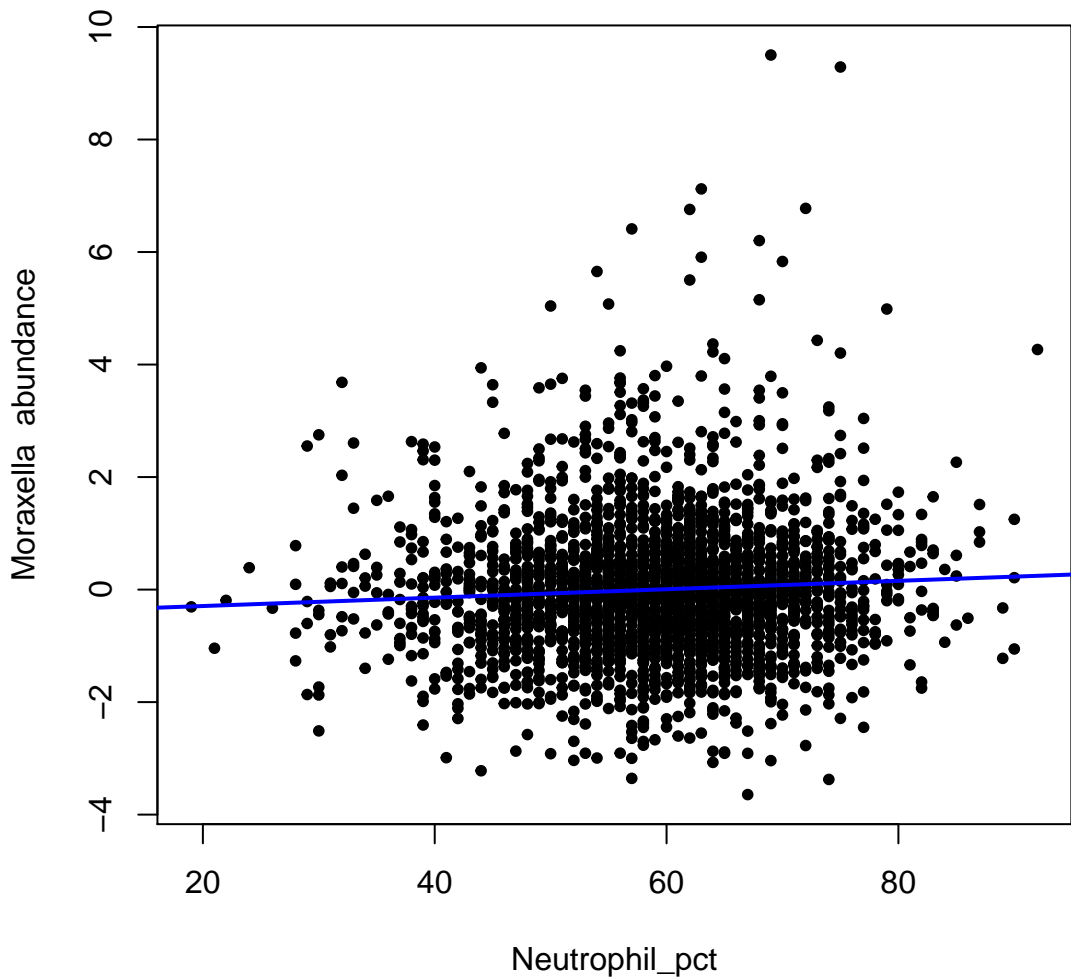

Plot of model residuals

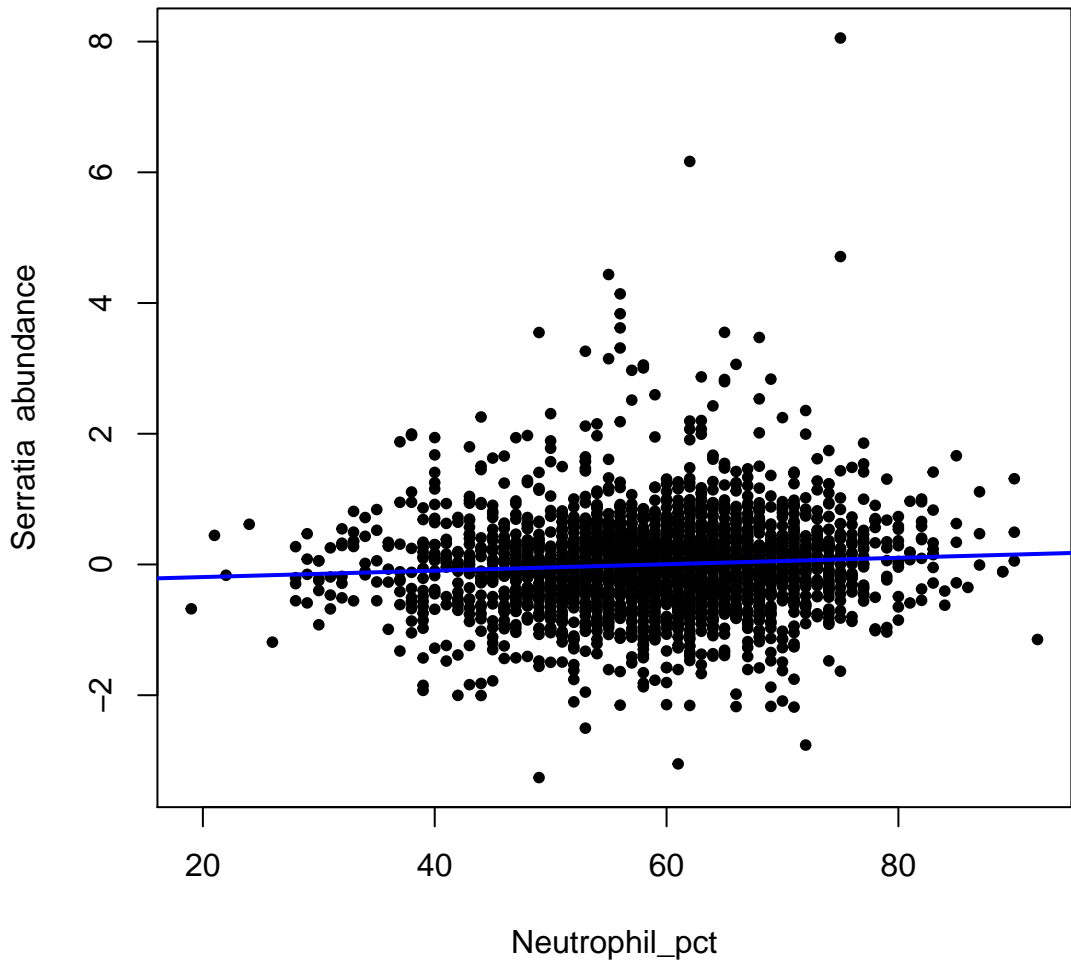

Plot of model residuals

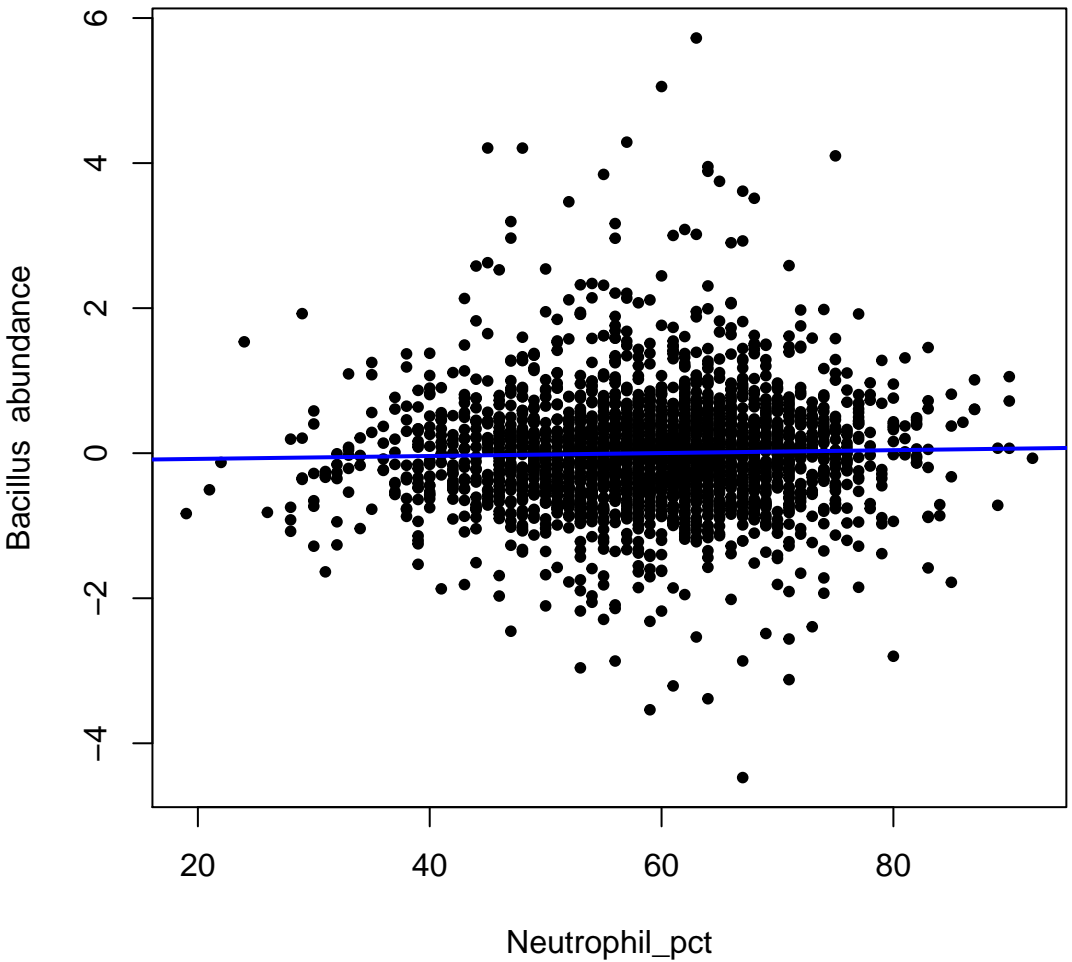

Plot of model residuals

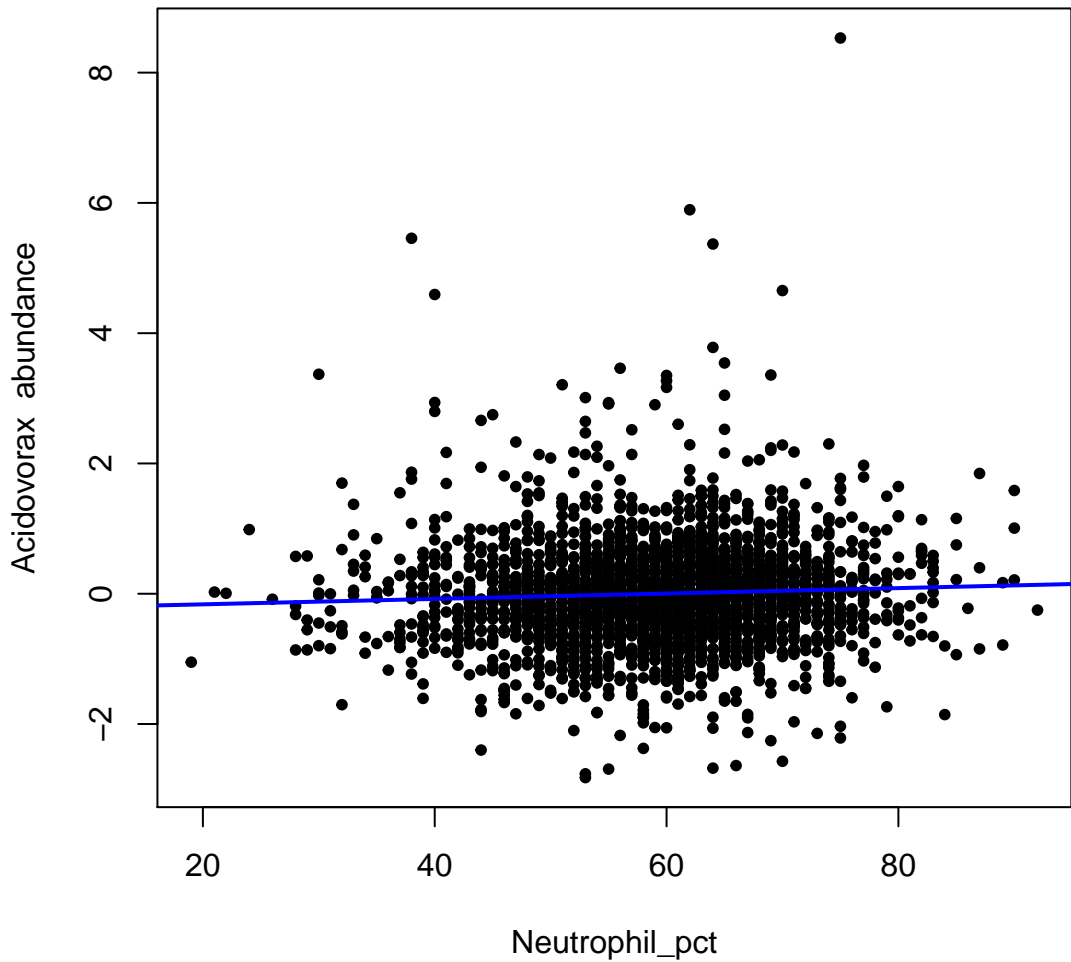



Plot of model residuals

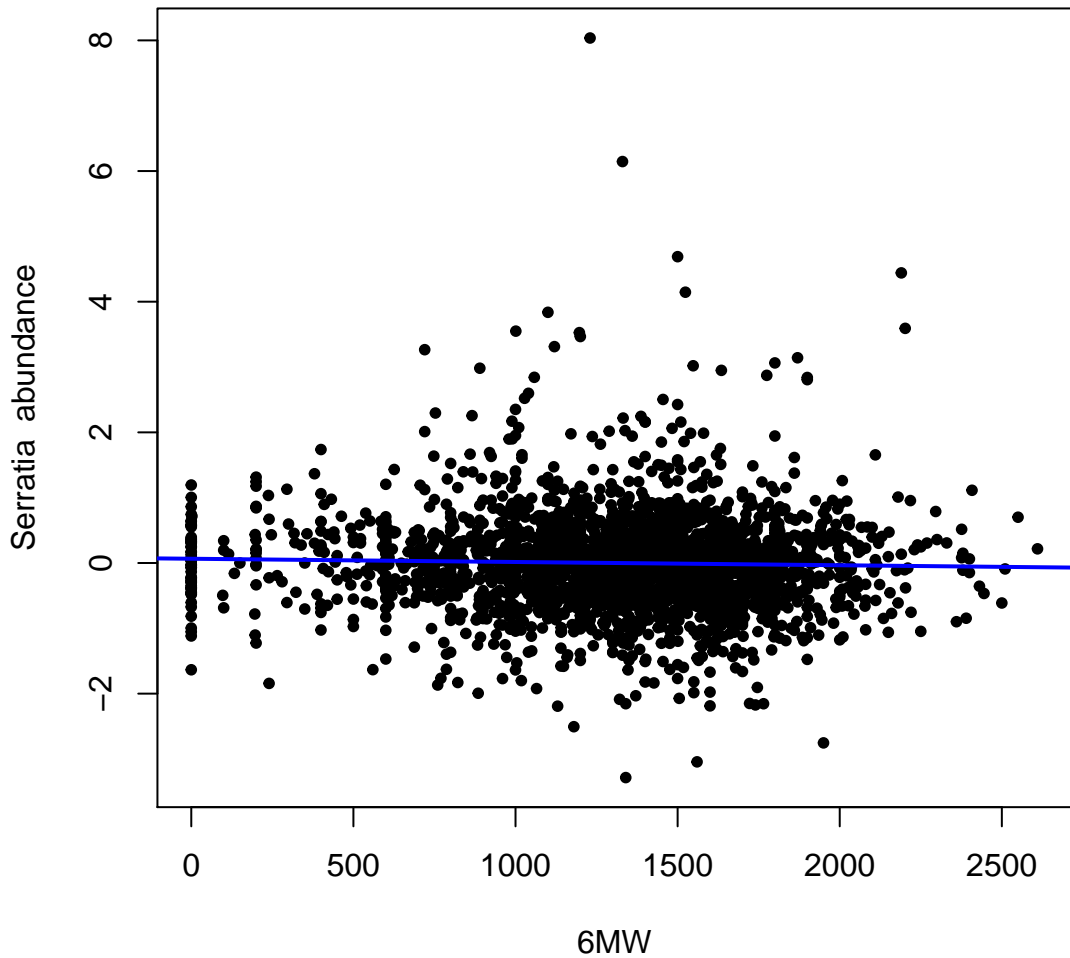

# Box plot of model residuals

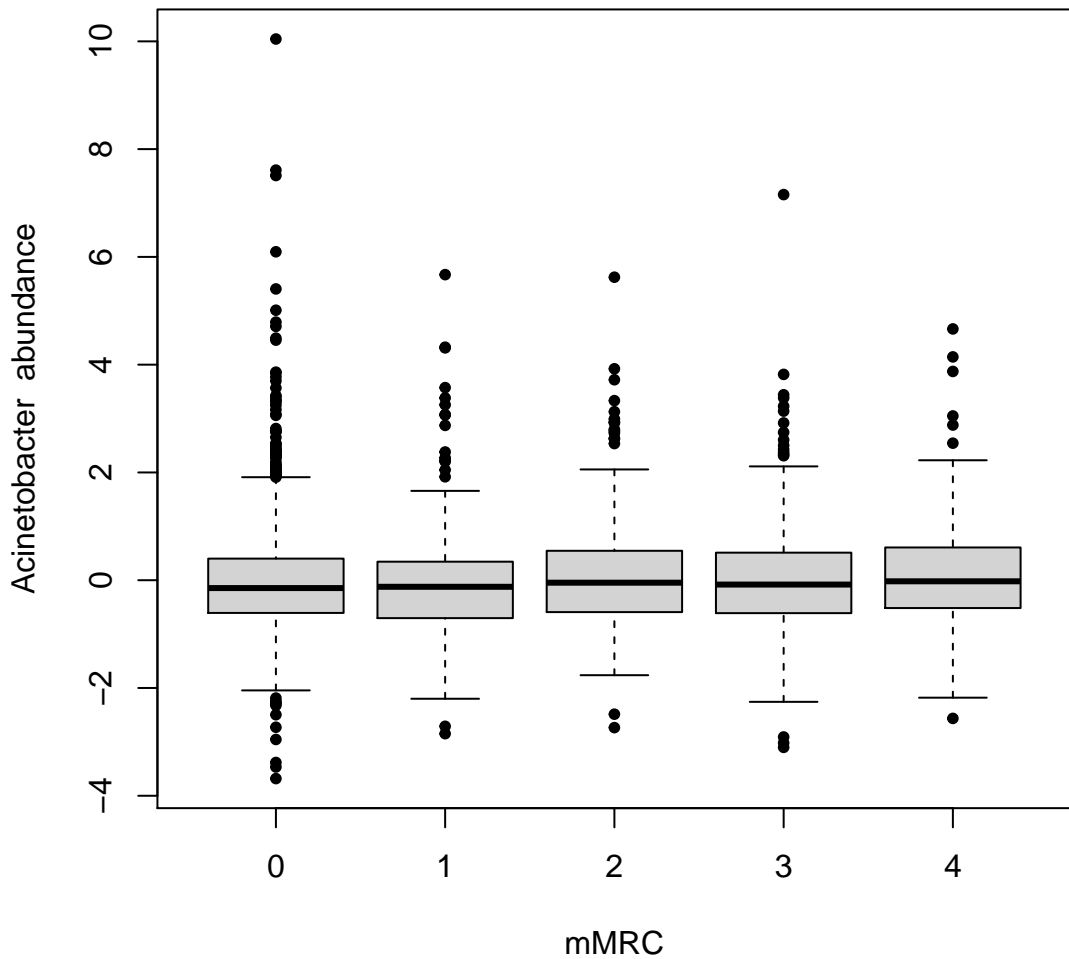

# Box plot of model residuals

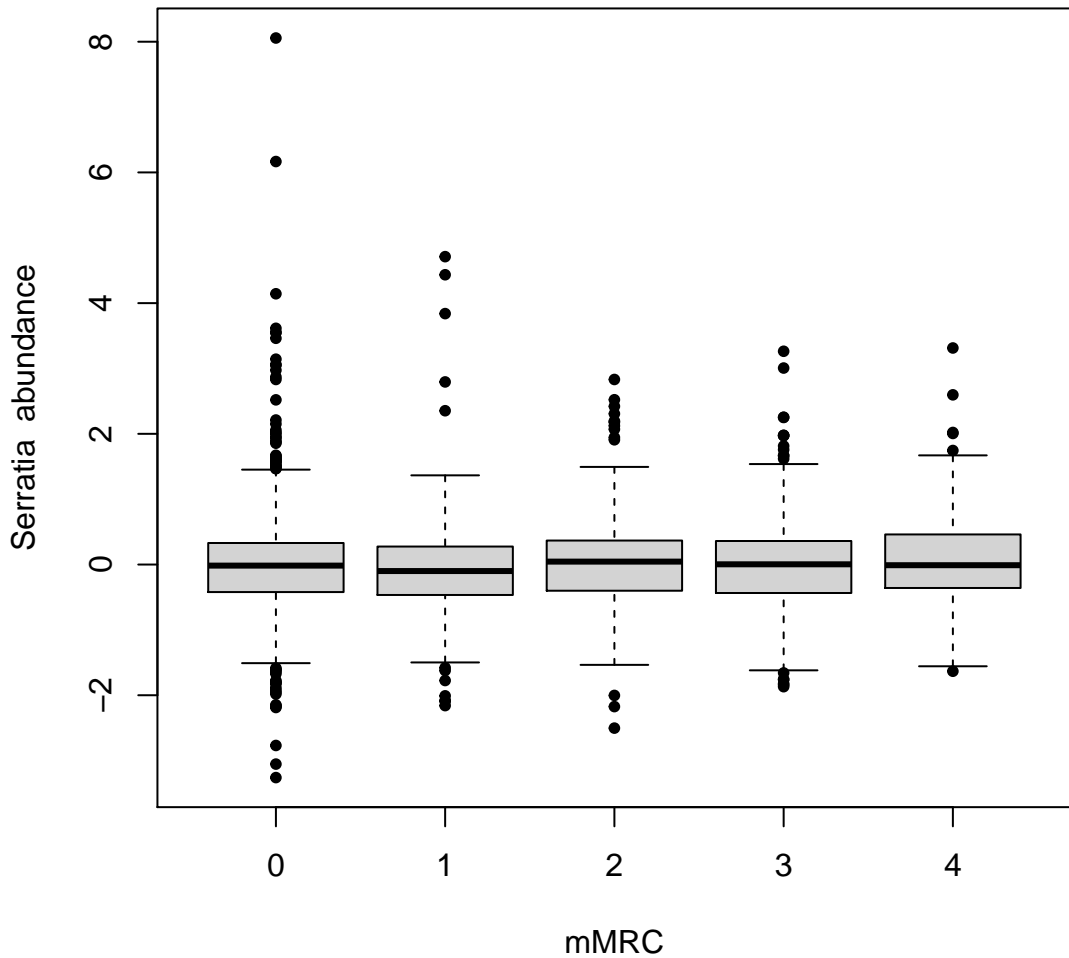

# Box plot of model residuals

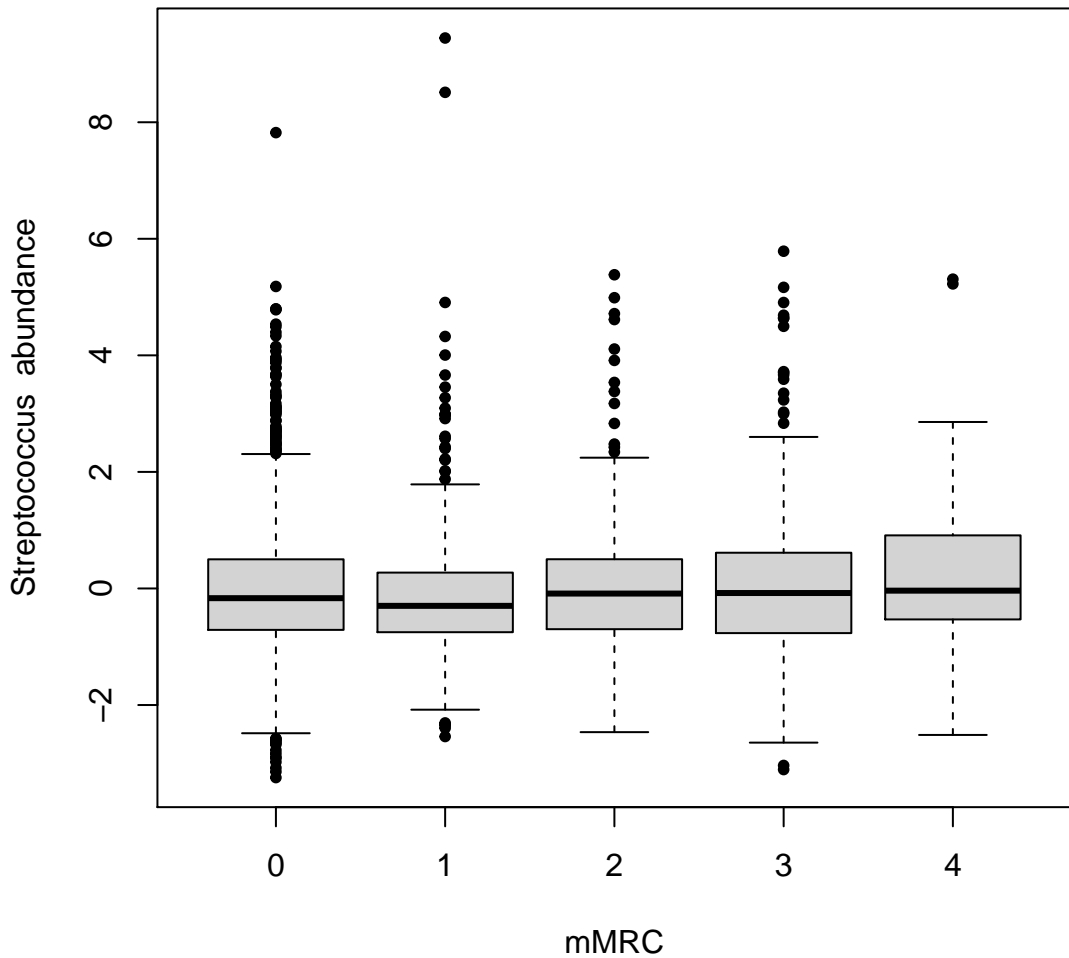

# Box plot of model residuals

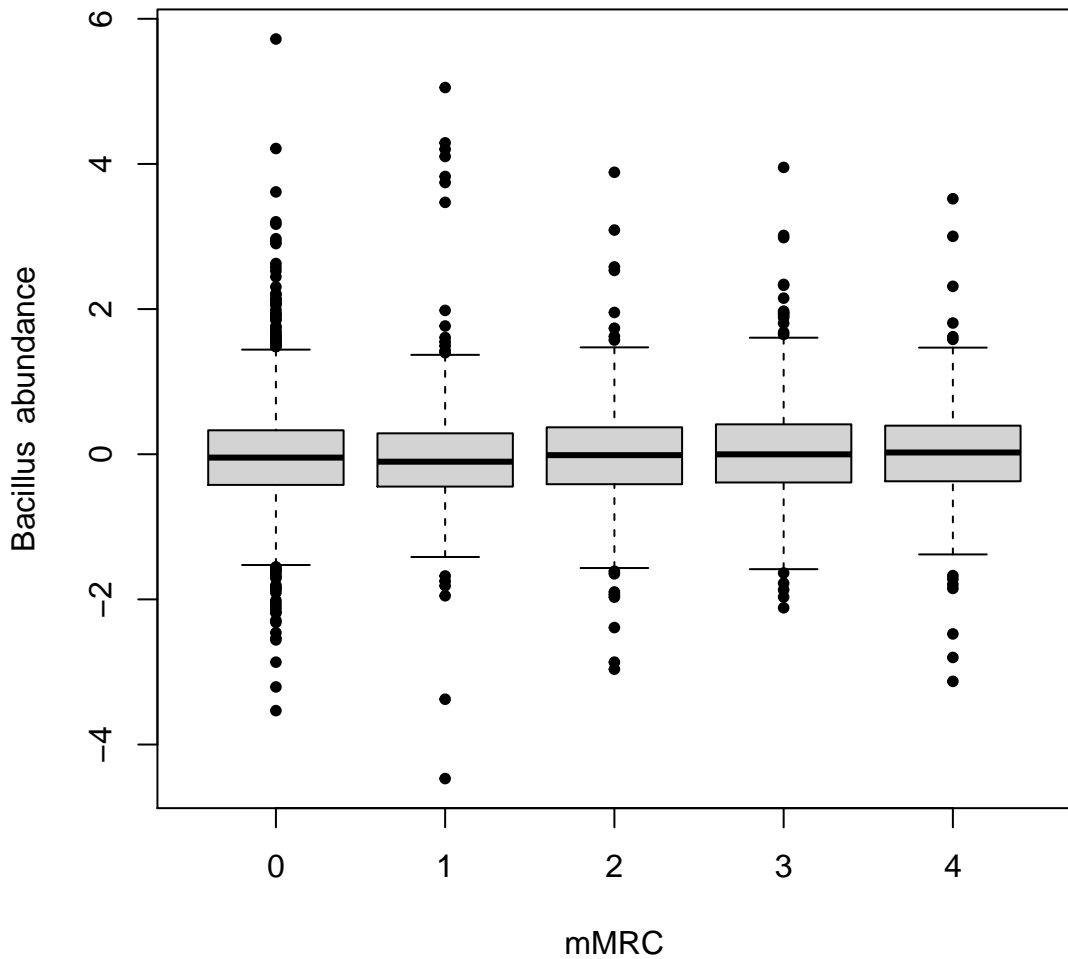

Plot of model residuals

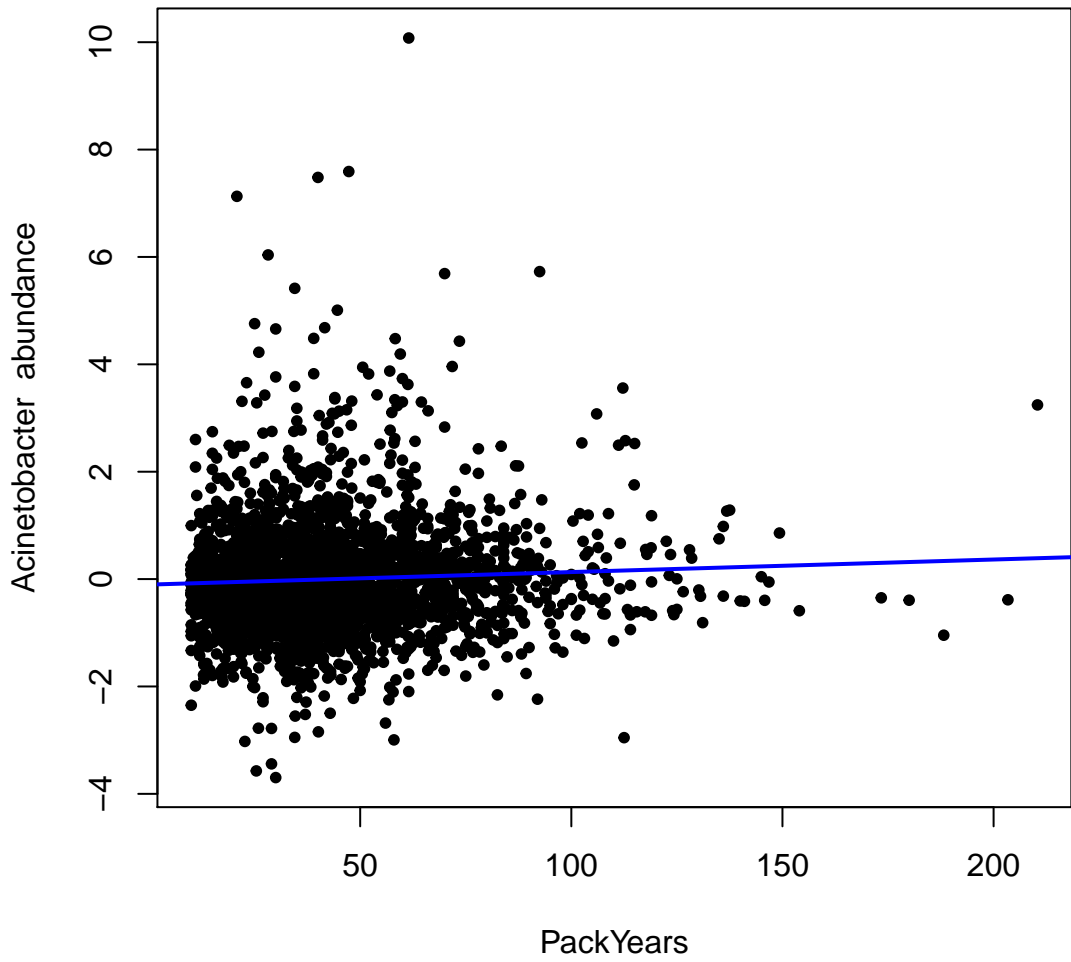

Plot of model residuals

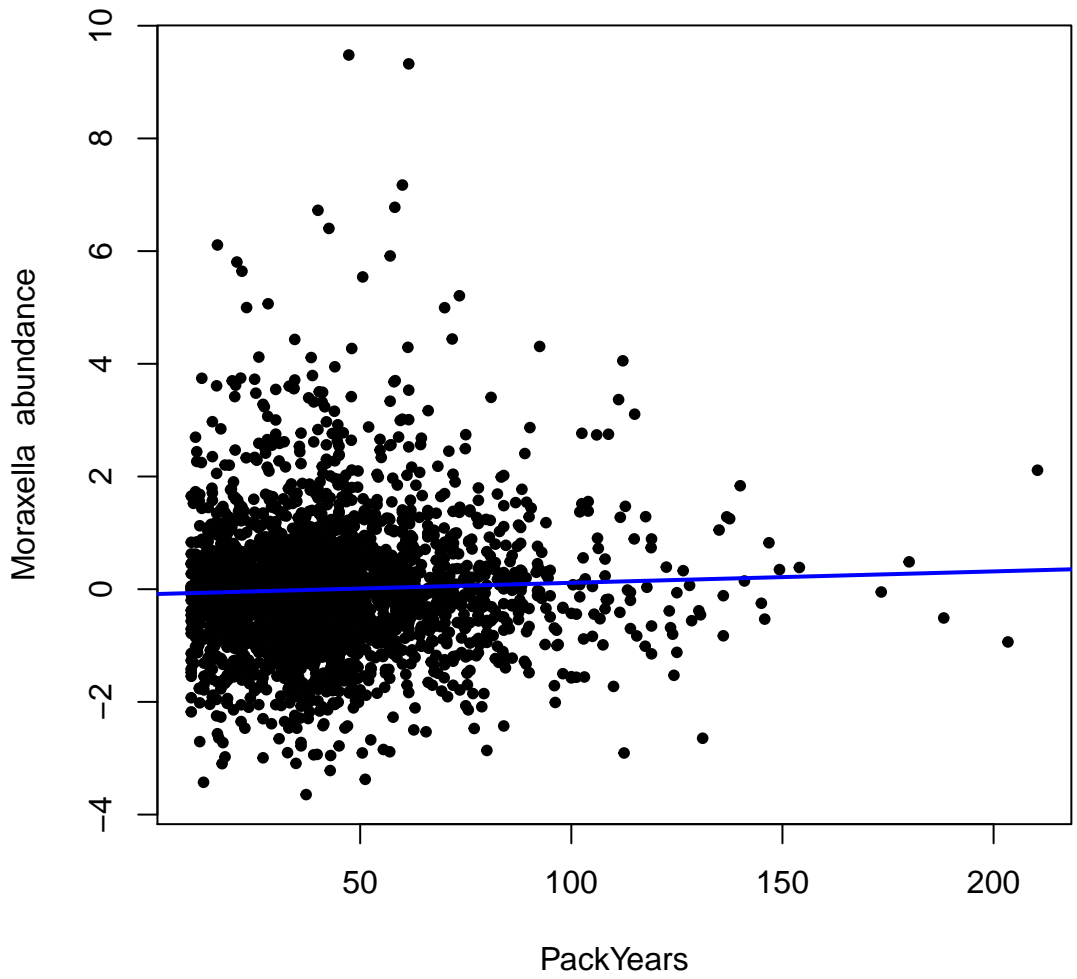

### Box plot of model residuals

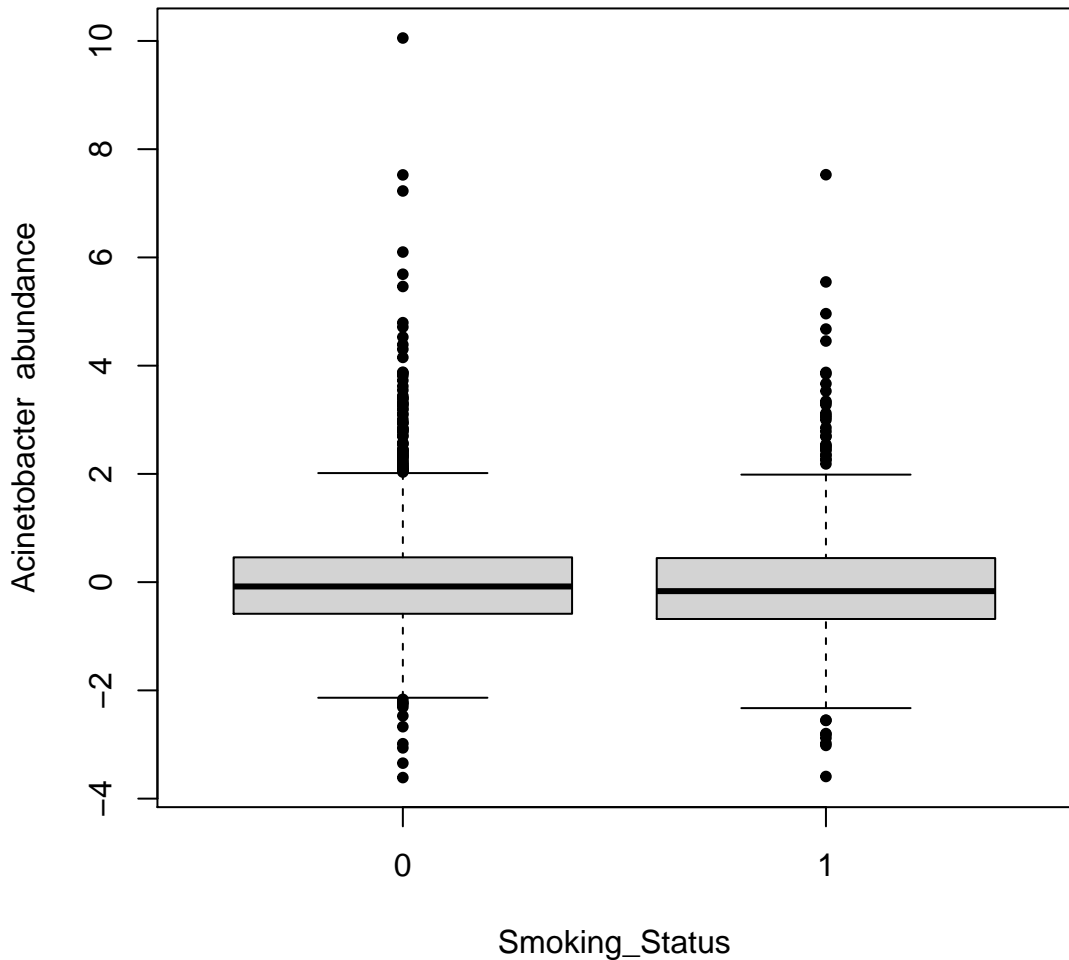



# Box plot of model residuals

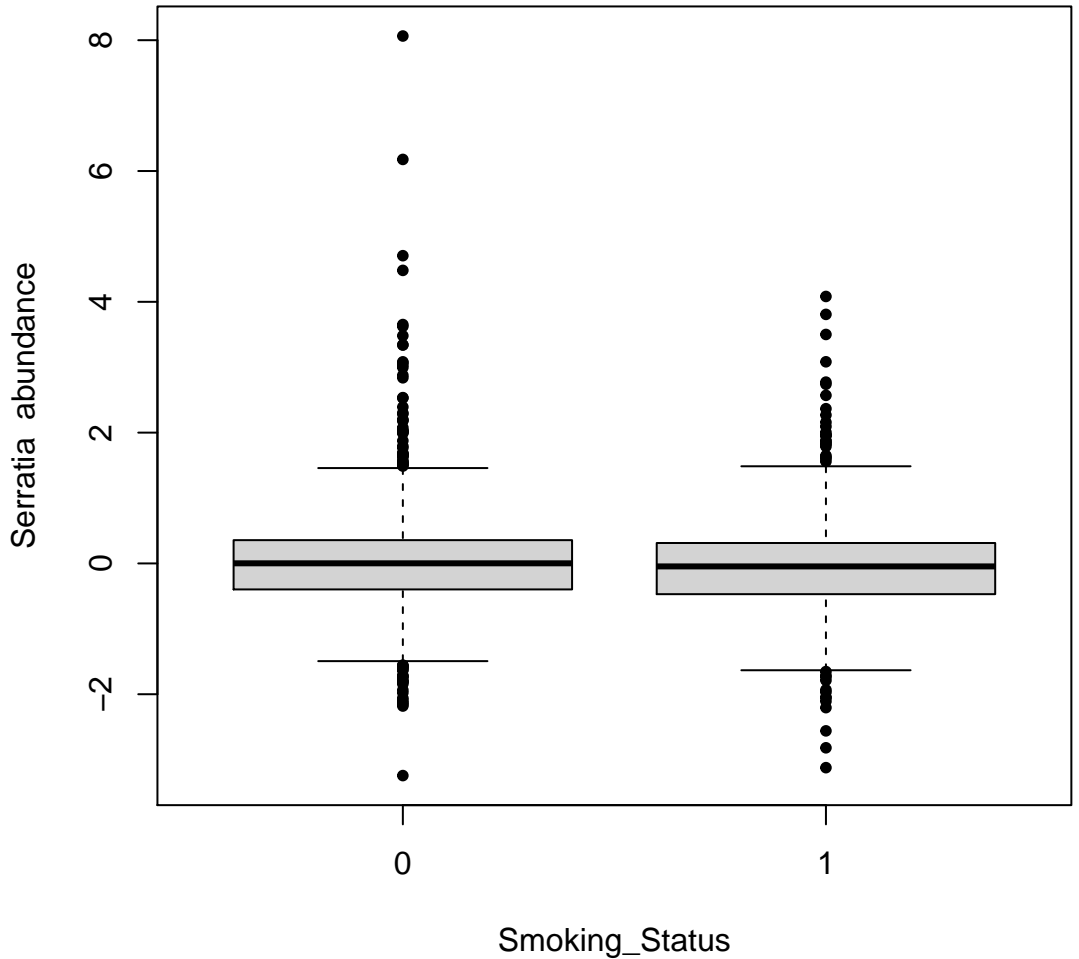

### Box plot of model residuals

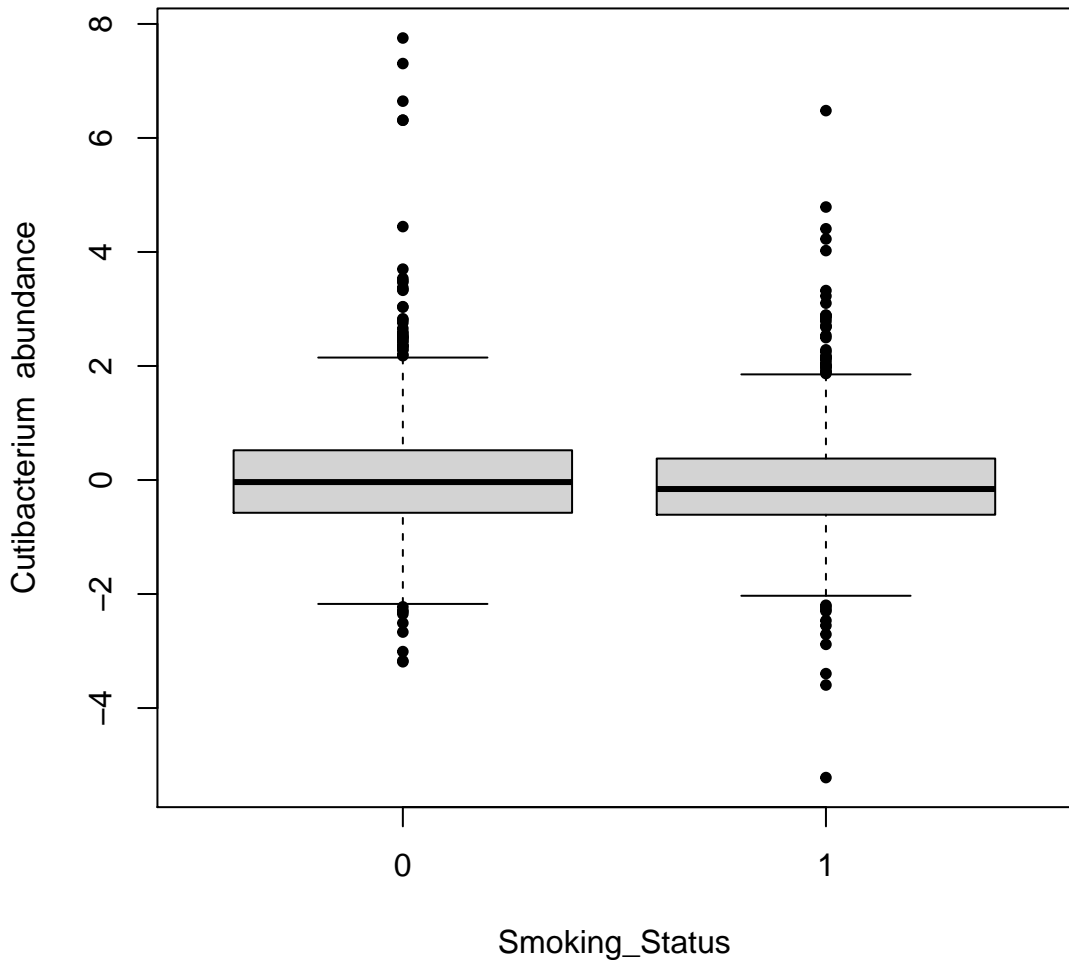

# Box plot of model residuals

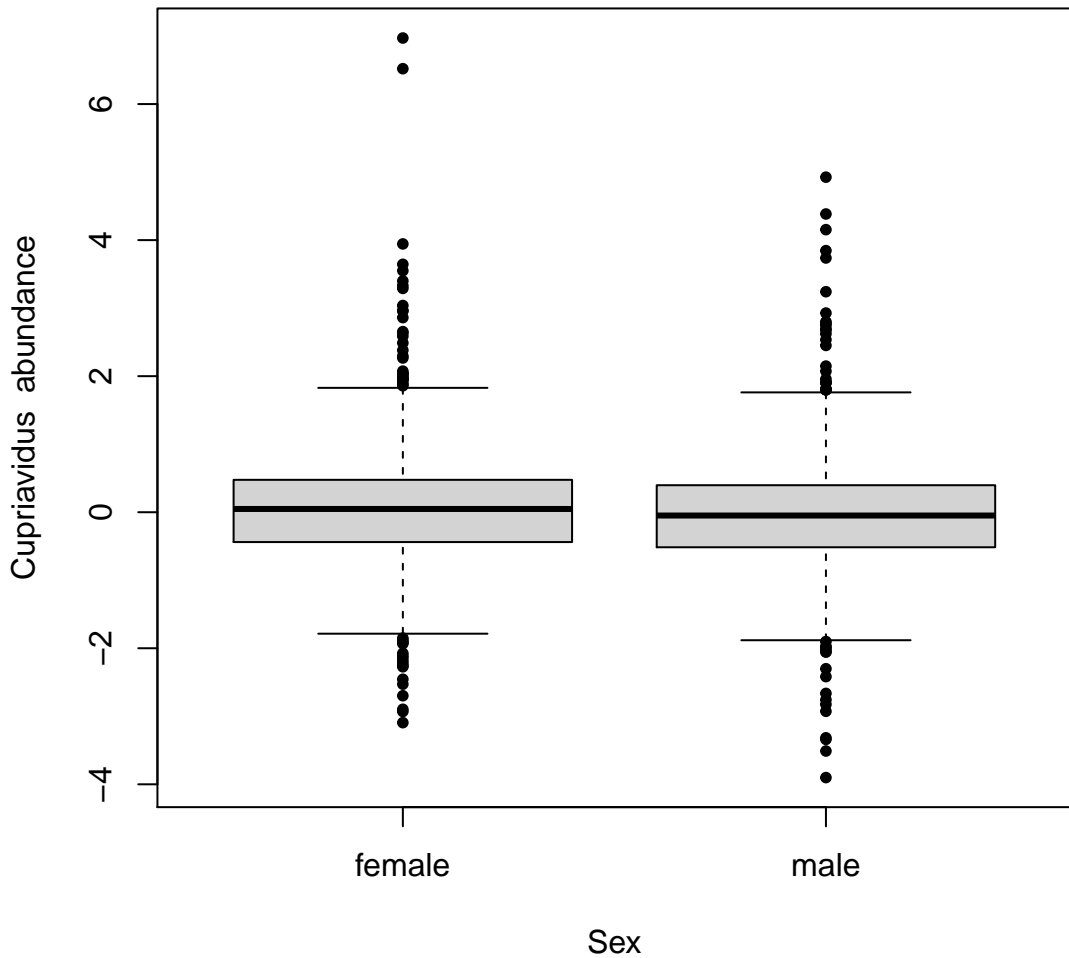

# Box plot of model residuals

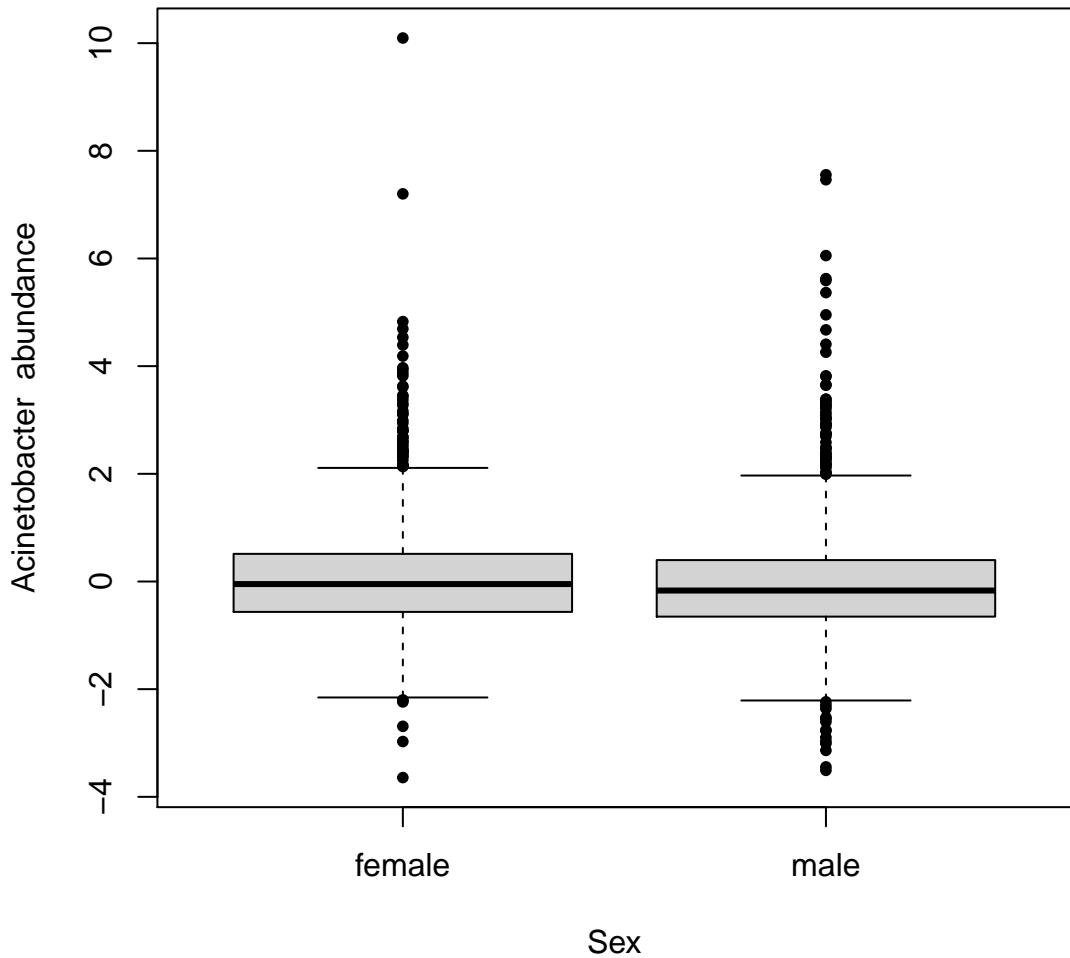

# Box plot of model residuals

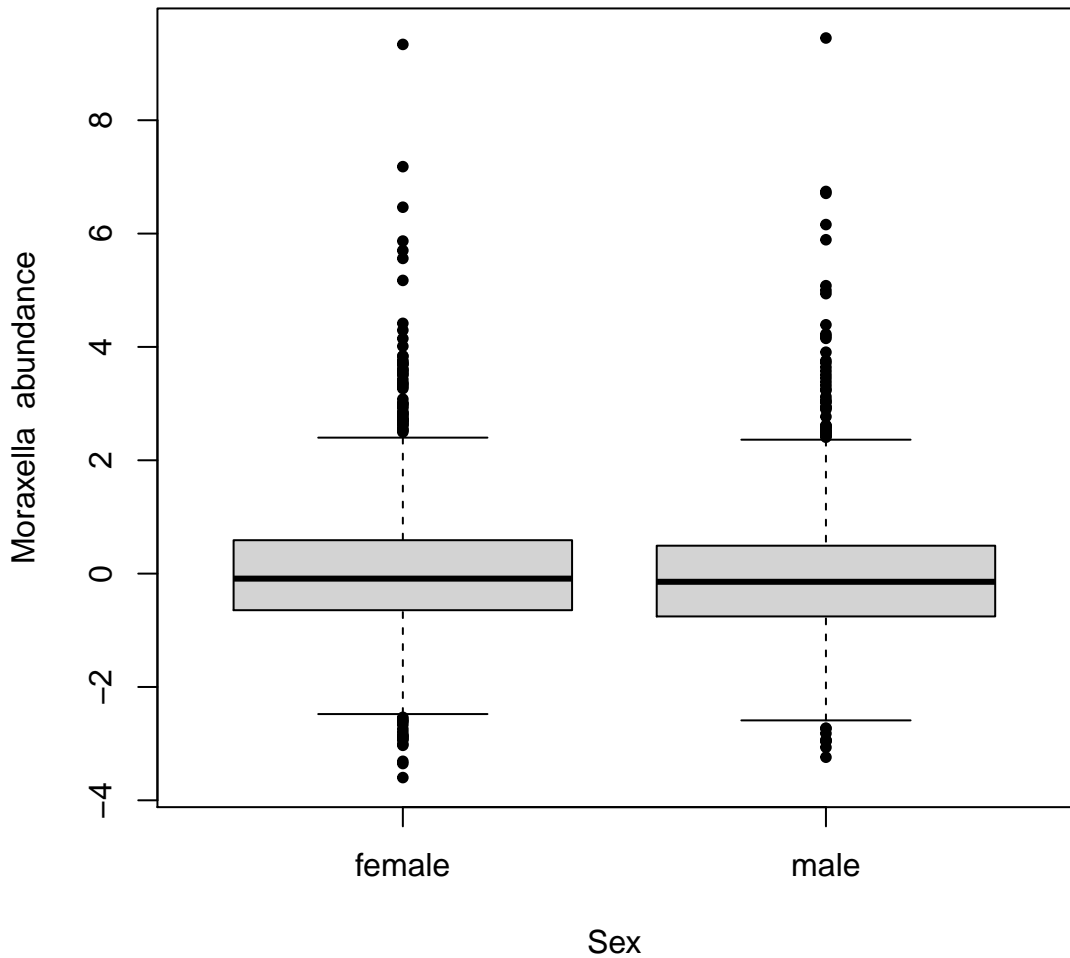

# Box plot of model residuals

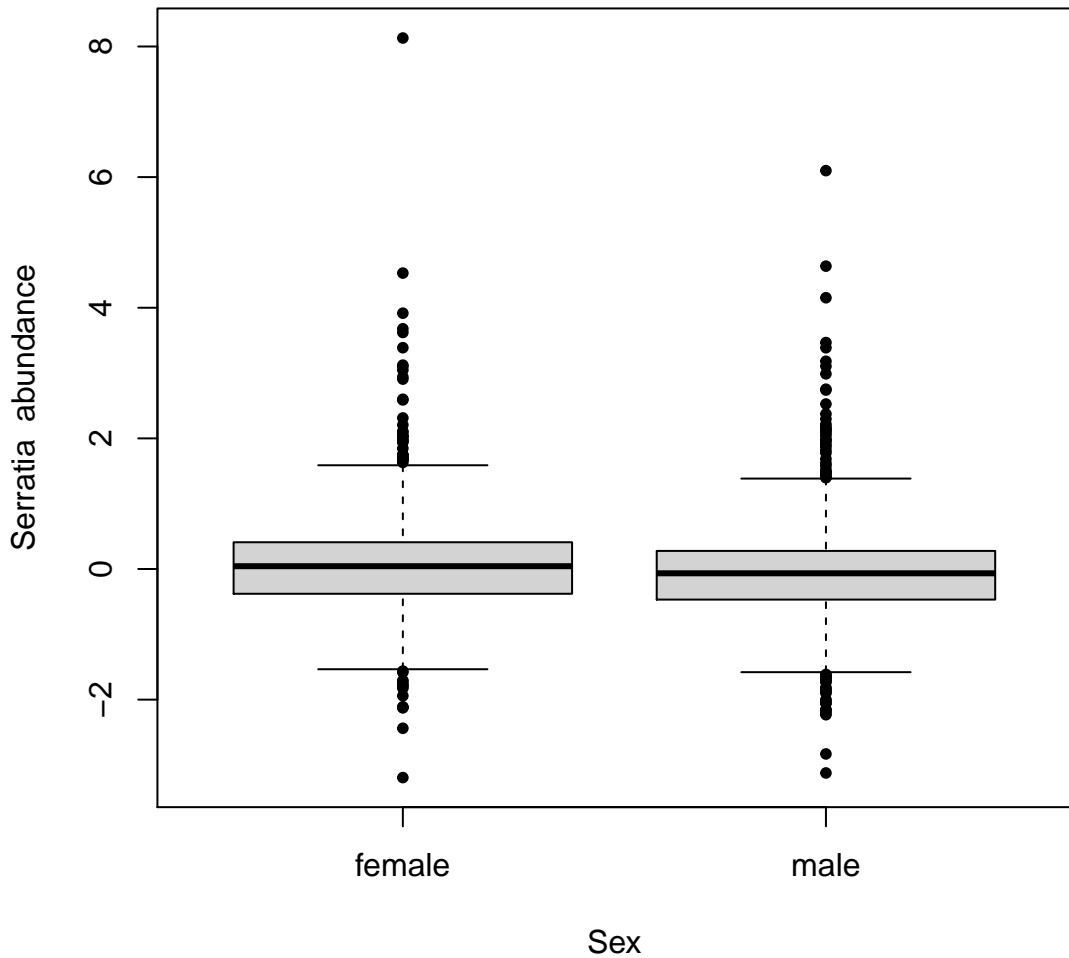

# Box plot of model residuals

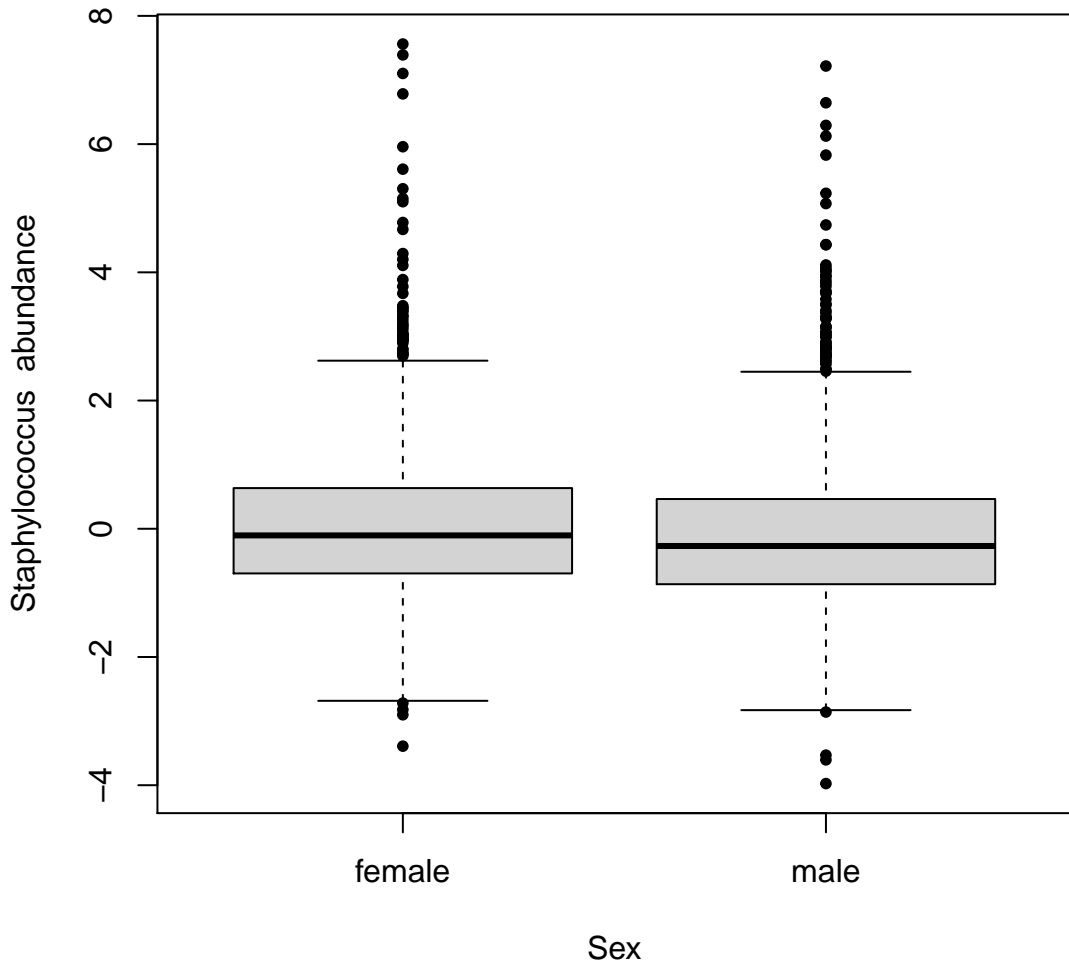

# Box plot of model residuals

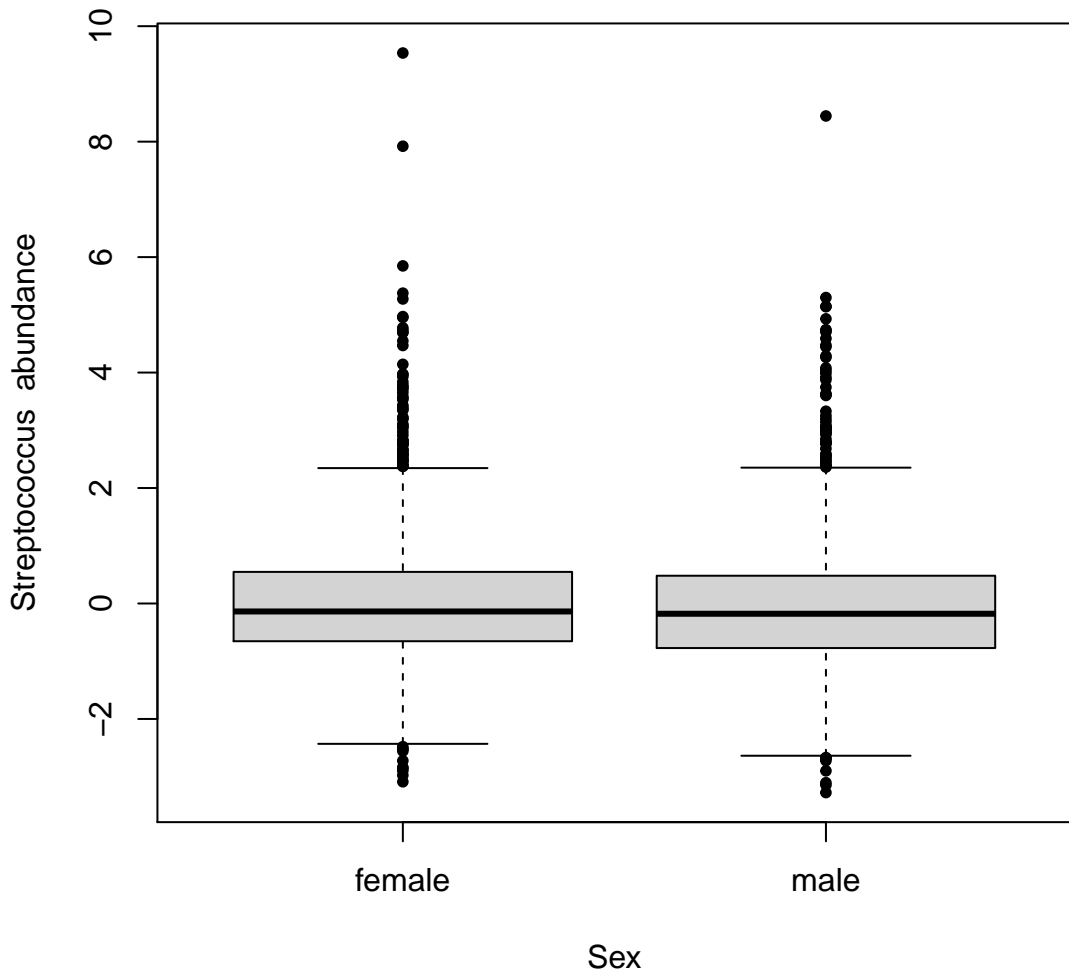



# Box plot of model residuals

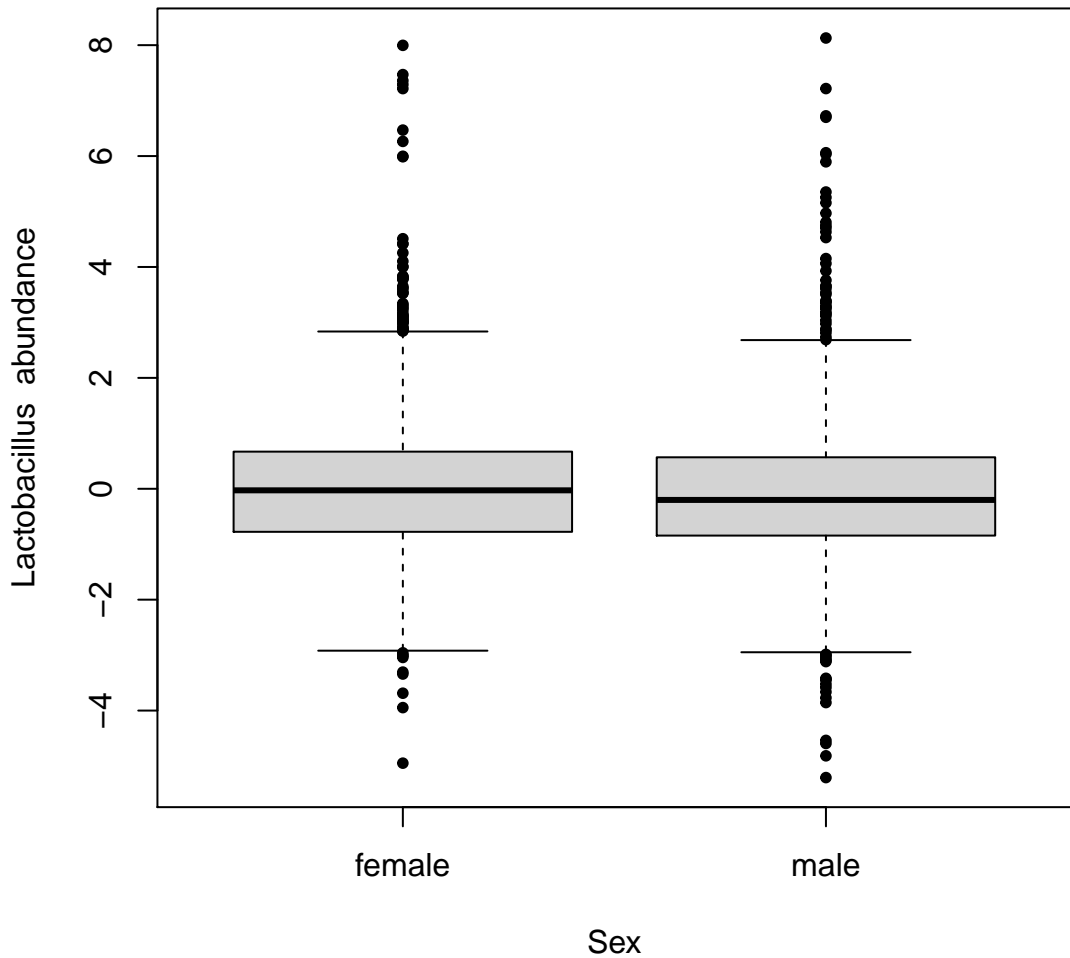

# Box plot of model residuals

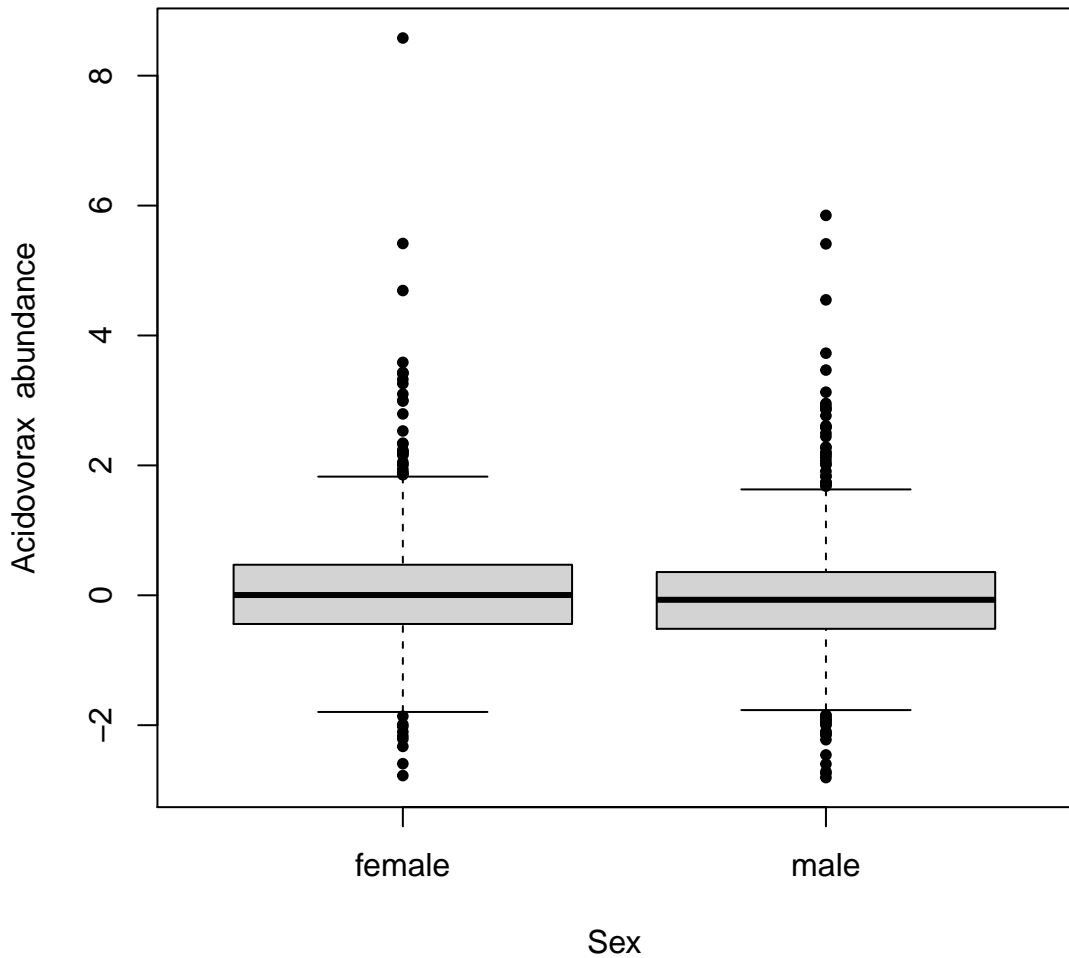

# Box plot of model residuals

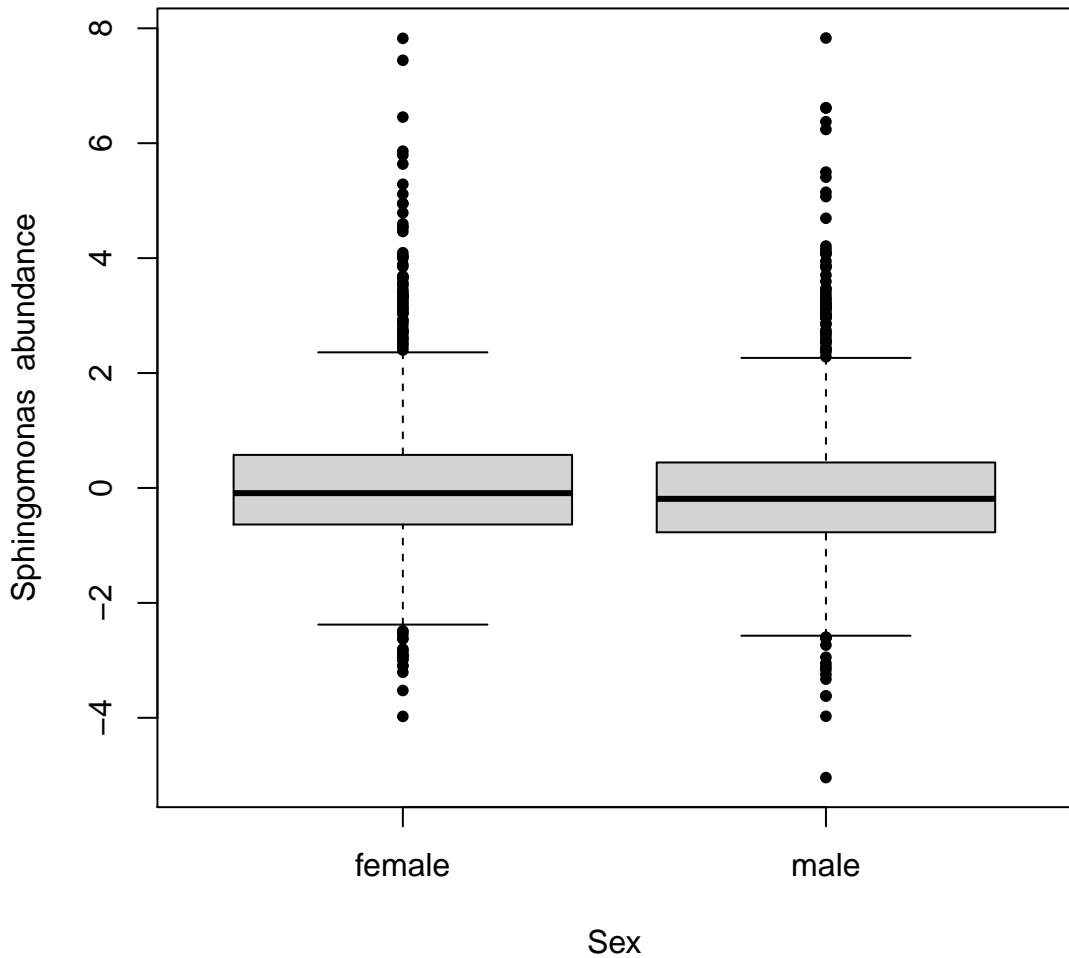

# Box plot of model residuals

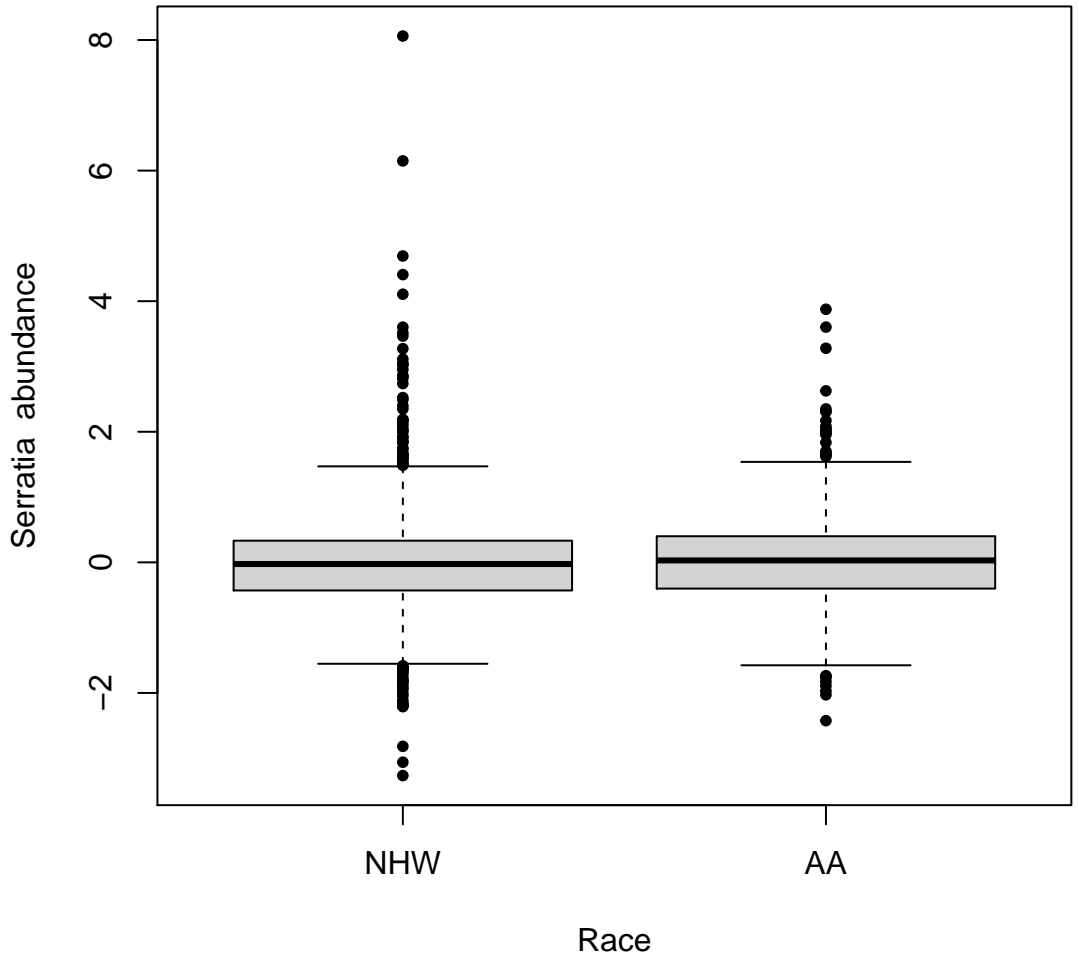

# Box plot of model residuals

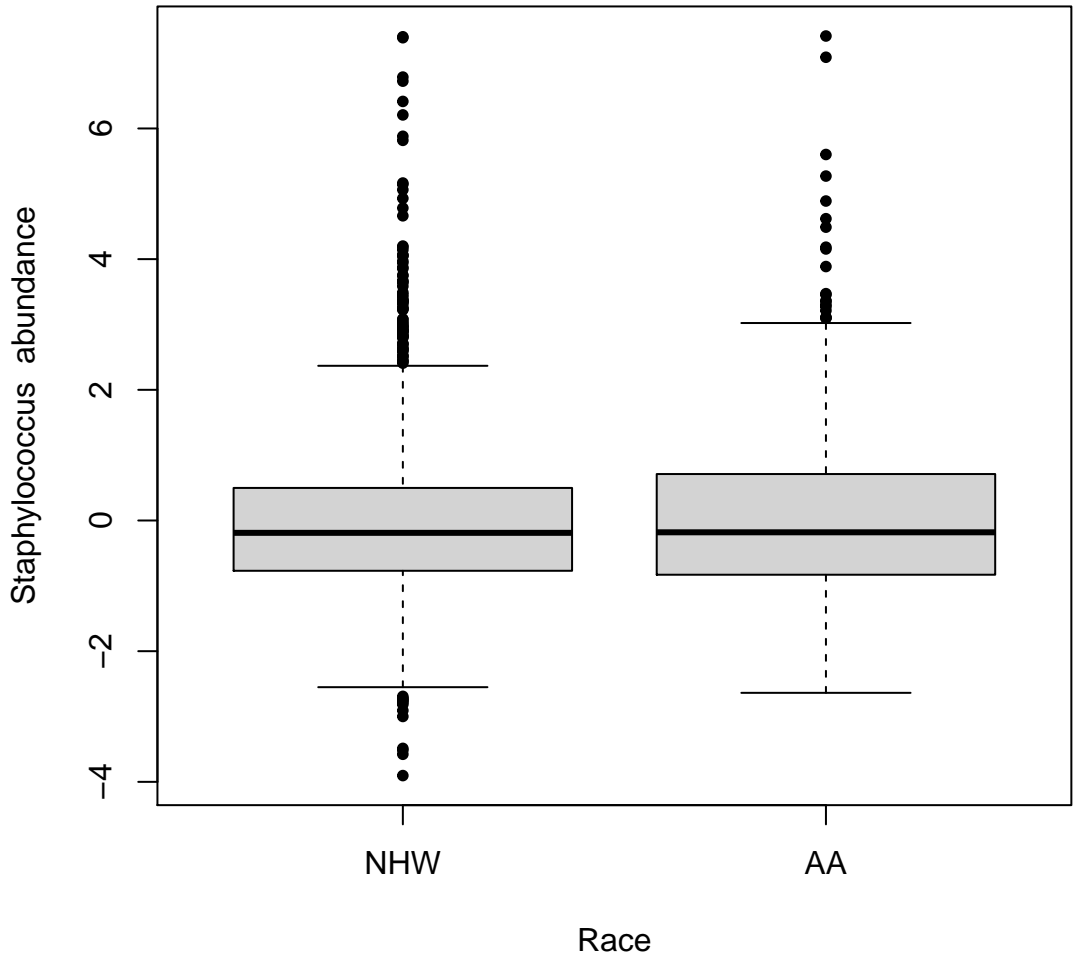

# Box plot of model residuals

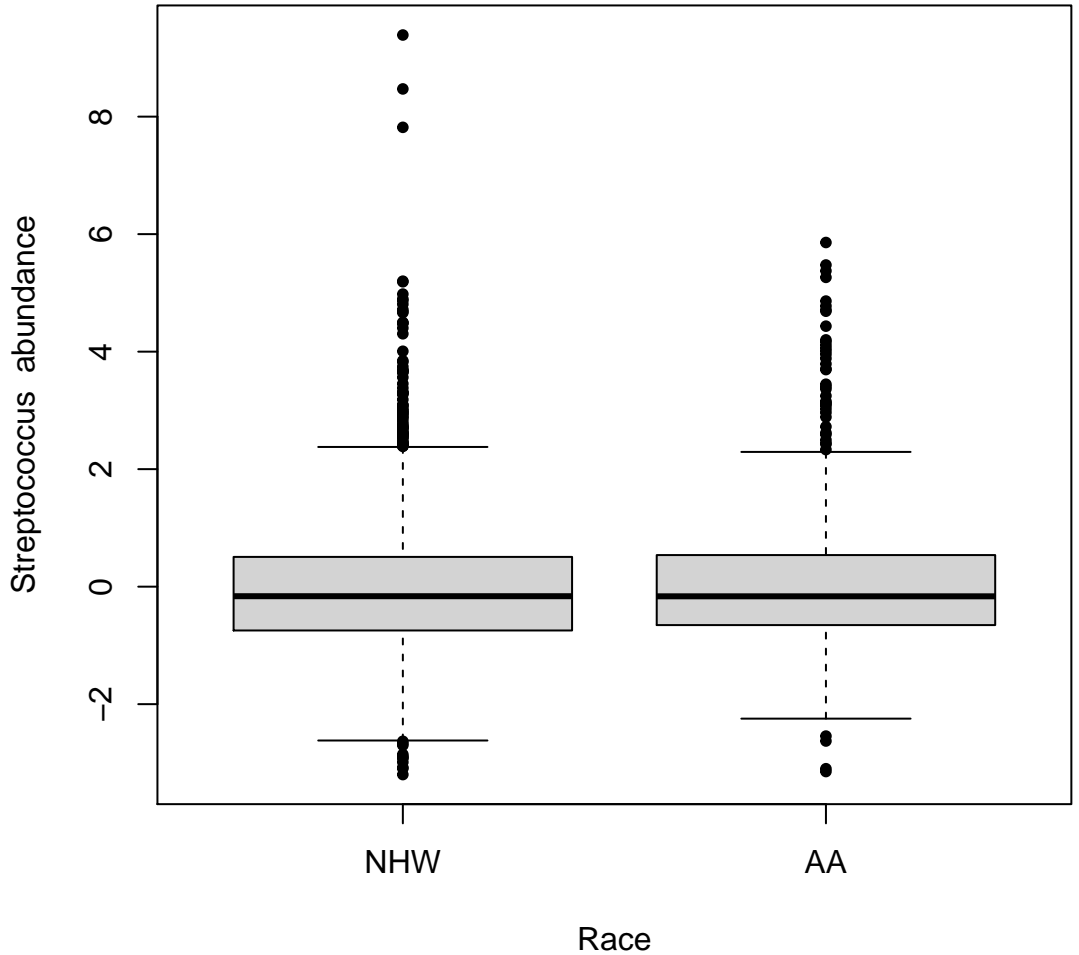

# Box plot of model residuals

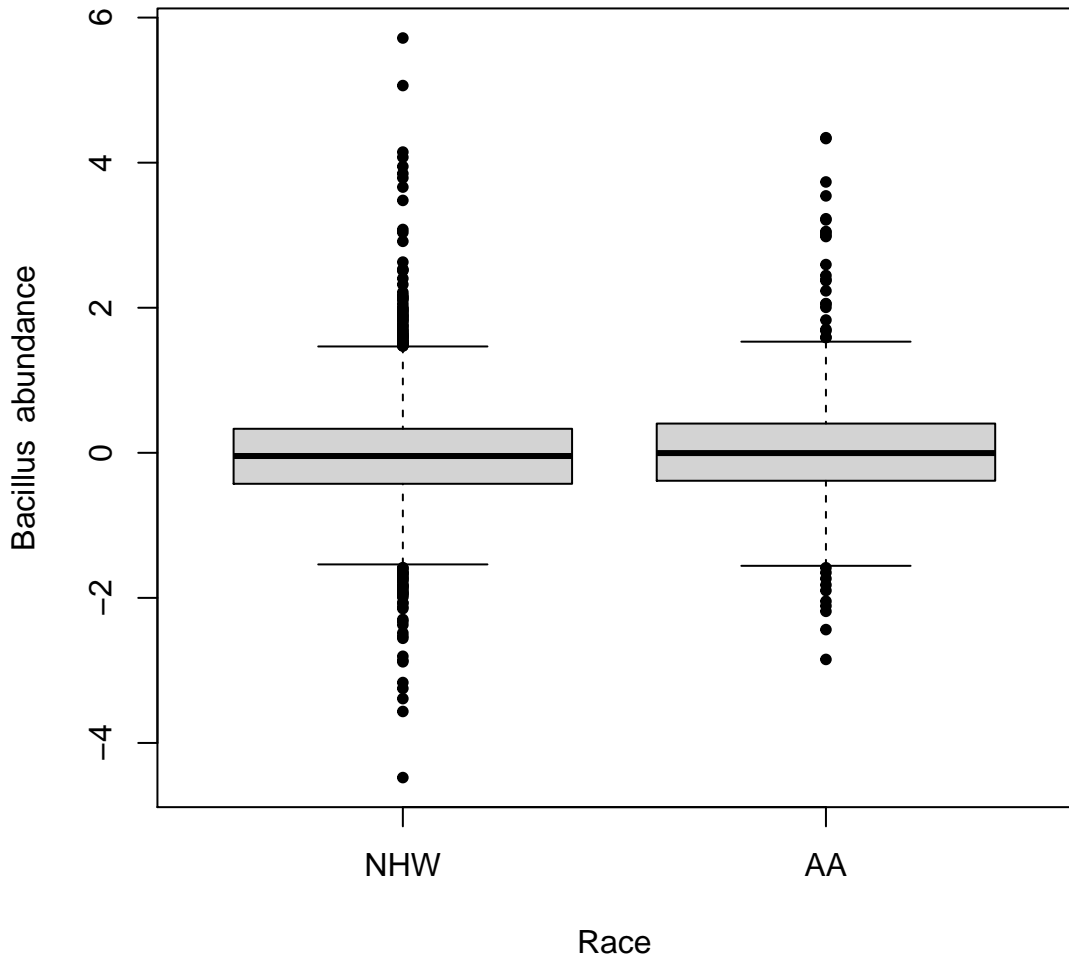

# Box plot of model residuals

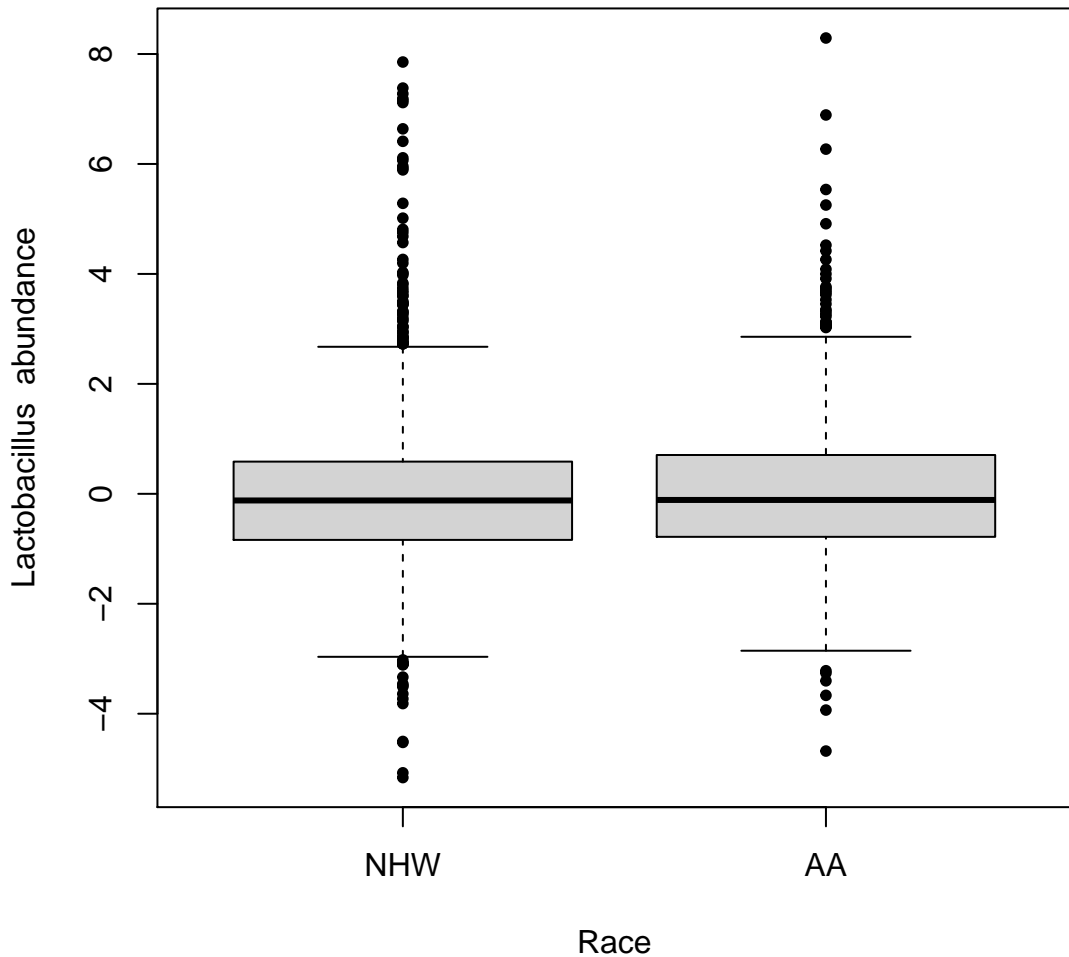



# Box plot of model residuals

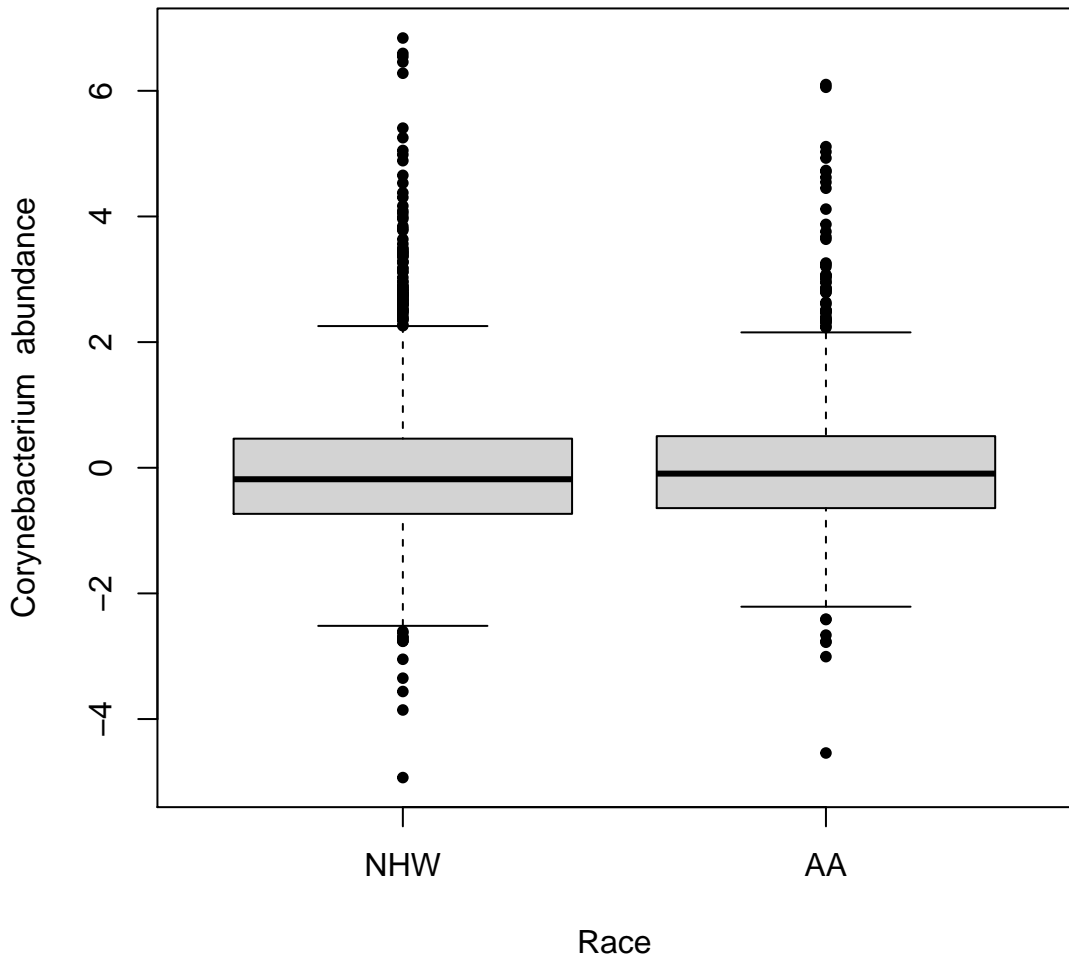

# Box plot of model residuals

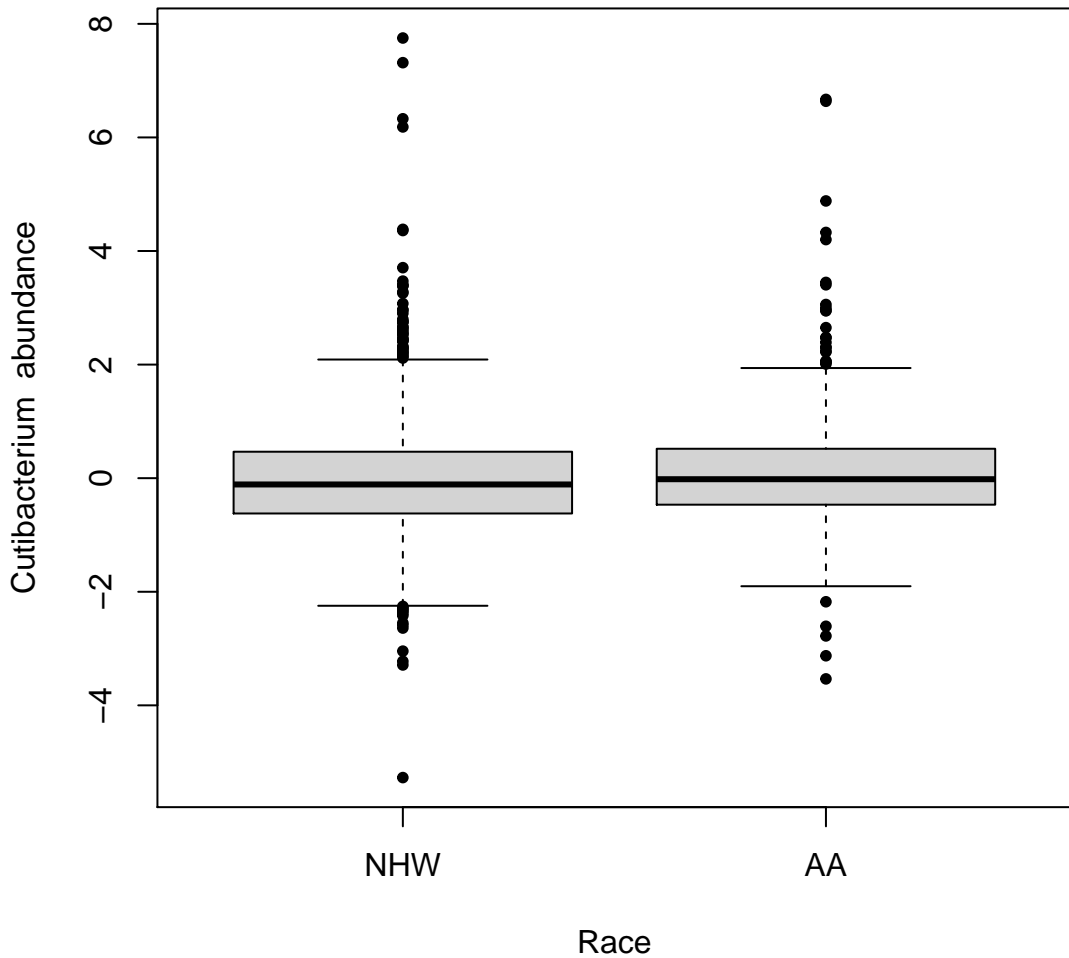

Supplement: 41598_2021_99238_MOESM2_ESM.pdf [file 41598_2021_99238_MOESM2_ESM.pdf]
